# Supplementary material
Source: publisher figshare collection journal article supplement (https://acs.figshare.com/ndownloader/files/10695880)
Supplement: Supplementary file 1 [file 10695880]

 
data_shelxl
 
_audit_creation_method            'SHELXL-2014/7'
_shelx_SHELXL_version_number      '2014/7'
_chemical_name_systematic         ?
_chemical_name_common             ?
_chemical_melting_point           ?
_chemical_formula_moiety          ?
_chemical_formula_sum
 'C4 H11 Br3 Cd Cl N' 
_chemical_formula_weight          460.72

loop_
 _atom_type_symbol
 _atom_type_description
 _atom_type_scat_dispersion_real
 _atom_type_scat_dispersion_imag
 _atom_type_scat_source
 'C'  'C'   0.0033   0.0016
 'International Tables Vol C Tables 4.2.6.8 and 6.1.1.4'
 'H'  'H'   0.0000   0.0000
 'International Tables Vol C Tables 4.2.6.8 and 6.1.1.4'
 'N'  'N'   0.0061   0.0033
 'International Tables Vol C Tables 4.2.6.8 and 6.1.1.4'
 'Cl'  'Cl'   0.1484   0.1585
 'International Tables Vol C Tables 4.2.6.8 and 6.1.1.4'
 'Br'  'Br'  -0.2901   2.4595
 'International Tables Vol C Tables 4.2.6.8 and 6.1.1.4'
 'Cd'  'Cd'  -0.8075   1.2024
 'International Tables Vol C Tables 4.2.6.8 and 6.1.1.4'
 
_space_group_crystal_system       hexagonal
_space_group_IT_number            186
_space_group_name_H-M_alt         'P 63 m c'
_space_group_name_Hall            'P 6c -2c'
 
_shelx_space_group_comment
;
The symmetry employed for this shelxl refinement is uniquely defined
by the following loop, which should always be used as a source of
symmetry information in preference to the above space-group names.
They are only intended as comments.
;
 
loop_
 _space_group_symop_operation_xyz
 'x, y, z'
 '-y, x-y, z'
 '-x+y, -x, z'
 '-x, -y, z+1/2'
 'y, -x+y, z+1/2'
 'x-y, x, z+1/2'
 '-y, -x, z'
 '-x+y, y, z'
 'x, x-y, z'
 'y, x, z+1/2'
 'x-y, -y, z+1/2'
 '-x, -x+y, z+1/2'
 
_cell_length_a                    9.402(2)
_cell_length_b                    9.402(2)
_cell_length_c                    6.977(7)
_cell_angle_alpha                 90
_cell_angle_beta                  90
_cell_angle_gamma                 120
_cell_volume                      534.1(6)
_cell_formula_units_Z             2
_cell_measurement_temperature     93(2)
_cell_measurement_reflns_used           1454
_cell_measurement_theta_min             2.5007
_cell_measurement_theta_max             27.3891
 
_exptl_crystal_description        BLOCK
_exptl_crystal_colour             COLORLESS
_exptl_crystal_density_meas       ?
_exptl_crystal_density_method     ?
_exptl_crystal_density_diffrn     2.865          
_exptl_crystal_F_000              424
_exptl_transmission_factor_min    ?
_exptl_transmission_factor_max    ?
_exptl_crystal_size_max           0.20
_exptl_crystal_size_mid           0.15
_exptl_crystal_size_min           0.12
_exptl_absorpt_coefficient_mu     13.454
_shelx_estimated_absorpt_T_min    ?
_shelx_estimated_absorpt_T_max    ?
_exptl_absorpt_correction_type          'Multi-scan'
_exptl_absorpt_correction_T_max         1.0000
_exptl_absorpt_correction_T_min         0.5610
_exptl_absorpt_process_details    ?
_exptl_absorpt_special_details    ?
_diffrn_ambient_temperature       93(2)
_diffrn_radiation_wavelength      0.71073
_diffrn_radiation_type            MoK\a
_diffrn_source                    ?
_diffrn_measurement_device_type   'Rigaku saturn 724'
_diffrn_measurement_method        ?
_diffrn_detector_area_resol_mean  ?
_diffrn_reflns_number             2285
_diffrn_reflns_av_unetI/netI      0.0358
_diffrn_reflns_av_R_equivalents   0.0481
_diffrn_reflns_limit_h_min        -12
_diffrn_reflns_limit_h_max        5
_diffrn_reflns_limit_k_min        -9
_diffrn_reflns_limit_k_max        12
_diffrn_reflns_limit_l_min        -7
_diffrn_reflns_limit_l_max        8
_diffrn_reflns_theta_min          3.846
_diffrn_reflns_theta_max          27.377
_diffrn_reflns_theta_full         25.242
_diffrn_measured_fraction_theta_max   0.950
_diffrn_measured_fraction_theta_full  0.962
_diffrn_reflns_Laue_measured_fraction_max    0.950
_diffrn_reflns_Laue_measured_fraction_full   0.962
_diffrn_reflns_point_group_measured_fraction_max   0.947
_diffrn_reflns_point_group_measured_fraction_full  0.961
_reflns_number_total              446
_reflns_number_gt                 387
_reflns_threshold_expression      'I > 2\s(I)'
_reflns_Friedel_coverage          0.833
_reflns_Friedel_fraction_max      0.945
_reflns_Friedel_fraction_full     0.960
 
_reflns_special_details
;
 Reflections were merged by SHELXL according to the crystal
 class for the calculation of statistics and refinement.
 
 _reflns_Friedel_fraction is defined as the number of unique
 Friedel pairs measured divided by the number that would be
 possible theoretically, ignoring centric projections and
 systematic absences.
;
 
_computing_data_collection        ?
_computing_cell_refinement        ?
_computing_data_reduction         ?
_computing_structure_solution     ?
_computing_structure_refinement 'SHELXL-2014/7 (Sheldrick, 2014)'
_computing_molecular_graphics     ?
_computing_publication_material   ?
_refine_special_details
;
 Refined as a 2-component inversion twin.
;
_refine_ls_structure_factor_coef  Fsqd
_refine_ls_matrix_type            full
_refine_ls_weighting_scheme       calc
_refine_ls_weighting_details
'w=1/[\s^2^(Fo^2^)+(0.0826P)^2^+3.6410P] where P=(Fo^2^+2Fc^2^)/3'
_atom_sites_solution_primary      ?
_atom_sites_solution_secondary    ?
_atom_sites_solution_hydrogens    .
_refine_ls_hydrogen_treatment     undef
_refine_ls_extinction_method      none
_refine_ls_extinction_coef        .
_refine_ls_abs_structure_details
;
 Refined as an inversion twin.
;
_refine_ls_abs_structure_Flack    0.44(10)
_chemical_absolute_configuration  ?
_refine_ls_number_reflns          446
_refine_ls_number_parameters      34
_refine_ls_number_restraints      31
_refine_ls_R_factor_all           0.0625
_refine_ls_R_factor_gt            0.0563
_refine_ls_wR_factor_ref          0.1527
_refine_ls_wR_factor_gt           0.1479
_refine_ls_goodness_of_fit_ref    1.111
_refine_ls_restrained_S_all       1.081
_refine_ls_shift/su_max           0.000
_refine_ls_shift/su_mean          0.000
 
loop_
 _atom_site_label
 _atom_site_type_symbol
 _atom_site_fract_x
 _atom_site_fract_y
 _atom_site_fract_z
 _atom_site_U_iso_or_equiv
 _atom_site_adp_type
 _atom_site_occupancy
 _atom_site_site_symmetry_order  
 _atom_site_calc_flag
 _atom_site_refinement_flags_posn
 _atom_site_refinement_flags_adp
 _atom_site_refinement_flags_occupancy
 _atom_site_disorder_assembly
 _atom_site_disorder_group
Cd1 Cd 1.0000 1.0000 0.577(3) 0.0309(7) Uani 1 6 d S T P . .
Br1 Br 0.7347(3) 0.86734(13) 0.834(3) 0.0473(8) Uani 1 2 d S T P . .
N1 N 0.3333 0.6667 1.2408(10) 0.062(14) Uani 1 6 d DS T P . .
C2 C 0.3930(16) 0.6070(16) 1.4042(16) 0.086(13) Uani 0.66667(14) 2 d DS TU P . .
C1 C 0.417(2) 0.583(2) 1.169(8) 0.085(13) Uani 0.66667(14) 2 d DS TU P . .
Cl1 Cl 0.2874(16) 0.575(3) 1.6126(2) 0.071(7) Uani 0.33332(14) 2 d DS TU P . .
 
loop_
 _atom_site_aniso_label
 _atom_site_aniso_U_11
 _atom_site_aniso_U_22
 _atom_site_aniso_U_33
 _atom_site_aniso_U_23
 _atom_site_aniso_U_13
 _atom_site_aniso_U_12
Cd1 0.0368(9) 0.0368(9) 0.0189(14) 0.000 0.000 0.0184(4)
Br1 0.0422(12) 0.0603(11) 0.0333(13) -0.0026(10) -0.005(2) 0.0211(6)
N1 0.047(14) 0.047(14) 0.09(4) 0.000 0.000 0.024(7)
C2 0.098(15) 0.098(15) 0.03(2) -0.019(10) 0.019(10) 0.028(18)
C1 0.098(15) 0.098(15) 0.03(2) -0.019(10) 0.019(10) 0.028(18)
Cl1 0.076(13) 0.072(15) 0.063(16) 0.031(12) 0.015(6) 0.036(8)
 
_geom_special_details
;
 All esds (except the esd in the dihedral angle between two l.s. planes)
 are estimated using the full covariance matrix.  The cell esds are taken
 into account individually in the estimation of esds in distances, angles
 and torsion angles; correlations between esds in cell parameters are only
 used when they are defined by crystal symmetry.  An approximate (isotropic)
 treatment of cell esds is used for estimating esds involving l.s. planes.
;
 
loop_
 _geom_bond_atom_site_label_1
 _geom_bond_atom_site_label_2
 _geom_bond_distance
 _geom_bond_site_symmetry_2
 _geom_bond_publ_flag
Cd1 Br1 2.747(4) 6_654 ?
Cd1 Br1 2.747(4) 5_564 ?
Cd1 Br1 2.747(4) 4_774 ?
Cd1 Br1 2.807(4) . ?
Cd1 Br1 2.807(4) 3_675 ?
Cd1 Br1 2.807(4) 2_765 ?
Br1 Cd1 2.747(4) 4_775 ?
N1 C1 1.45(3) 3_565 ?
N1 C1 1.45(3) 2_665 ?
N1 C1 1.45(3) . ?
N1 C2 1.50(3) . ?
N1 C2 1.50(3) 2_665 ?
N1 C2 1.50(3) 3_565 ?
C2 C2 1.68(5) 2_665 ?
C2 C2 1.68(5) 3_565 ?
C2 C1 1.69(5) . ?
C2 Cl1 1.7000(19) . ?
C2 Cl1 1.7000(19) 2_665 ?
C2 Cl1 2.25(2) 3_565 ?
Cl1 Cl1 1.30(5) 2_665 ?
Cl1 Cl1 1.30(5) 3_565 ?
Cl1 C2 1.7000(19) 3_565 ?
Cl1 C2 2.25(2) 2_665 ?
 
loop_
 _geom_angle_atom_site_label_1
 _geom_angle_atom_site_label_2
 _geom_angle_atom_site_label_3
 _geom_angle
 _geom_angle_site_symmetry_1
 _geom_angle_site_symmetry_3
 _geom_angle_publ_flag
Br1 Cd1 Br1 85.86(14) 6_654 5_564 ?
Br1 Cd1 Br1 85.86(14) 6_654 4_774 ?
Br1 Cd1 Br1 85.86(14) 5_564 4_774 ?
Br1 Cd1 Br1 95.26(6) 6_654 . ?
Br1 Cd1 Br1 95.26(6) 5_564 . ?
Br1 Cd1 Br1 178.46(16) 4_774 . ?
Br1 Cd1 Br1 178.47(16) 6_654 3_675 ?
Br1 Cd1 Br1 95.26(6) 5_564 3_675 ?
Br1 Cd1 Br1 95.26(6) 4_774 3_675 ?
Br1 Cd1 Br1 83.60(13) . 3_675 ?
Br1 Cd1 Br1 95.26(6) 6_654 2_765 ?
Br1 Cd1 Br1 178.47(16) 5_564 2_765 ?
Br1 Cd1 Br1 95.26(6) 4_774 2_765 ?
Br1 Cd1 Br1 83.60(13) . 2_765 ?
Br1 Cd1 Br1 83.60(13) 3_675 2_765 ?
Cd1 Br1 Cd1 77.82(8) 4_775 . ?
C1 N1 C1 109(3) 3_565 2_665 ?
C1 N1 C1 109(3) 3_565 . ?
C1 N1 C1 109(3) 2_665 . ?
C1 N1 C2 124.7(18) 3_565 . ?
C1 N1 C2 124.7(18) 2_665 . ?
C1 N1 C2 70(2) . . ?
C1 N1 C2 124.7(18) 3_565 2_665 ?
C1 N1 C2 70(2) 2_665 2_665 ?
C1 N1 C2 124.7(18) . 2_665 ?
C2 N1 C2 68.3(8) . 2_665 ?
C1 N1 C2 70(2) 3_565 3_565 ?
C1 N1 C2 124.7(18) 2_665 3_565 ?
C1 N1 C2 124.7(18) . 3_565 ?
C2 N1 C2 68.3(8) . 3_565 ?
C2 N1 C2 68.3(8) 2_665 3_565 ?
N1 C2 C2 55.8(4) . 2_665 ?
N1 C2 C2 55.8(4) . 3_565 ?
C2 C2 C2 60.000(18) 2_665 3_565 ?
N1 C2 C1 53.6(16) . . ?
C2 C2 C1 101.4(16) 2_665 . ?
C2 C2 C1 101.4(16) 3_565 . ?
N1 C2 Cl1 115.1(14) . . ?
C2 C2 Cl1 83.5(11) 2_665 . ?
C2 C2 Cl1 60.4(9) 3_565 . ?
C1 C2 Cl1 155.9(12) . . ?
N1 C2 Cl1 115.1(14) . 2_665 ?
C2 C2 Cl1 60.4(9) 2_665 2_665 ?
C2 C2 Cl1 83.5(11) 3_565 2_665 ?
C1 C2 Cl1 155.9(12) . 2_665 ?
Cl1 C2 Cl1 44.8(17) . 2_665 ?
N1 C2 Cl1 89.8(13) . 3_565 ?
C2 C2 Cl1 48.6(6) 2_665 3_565 ?
C2 C2 Cl1 48.6(6) 3_565 3_565 ?
C1 C2 Cl1 143(2) . 3_565 ?
Cl1 C2 Cl1 34.9(12) . 3_565 ?
Cl1 C2 Cl1 34.9(12) 2_665 3_565 ?
N1 C1 C2 56.4(16) . . ?
Cl1 Cl1 Cl1 59.999(1) 2_665 3_565 ?
Cl1 Cl1 C2 96.5(11) 2_665 3_565 ?
Cl1 Cl1 C2 67.6(8) 3_565 3_565 ?
Cl1 Cl1 C2 67.6(8) 2_665 . ?
Cl1 Cl1 C2 96.5(11) 3_565 . ?
C2 Cl1 C2 59.3(18) 3_565 . ?
Cl1 Cl1 C2 48.6(6) 2_665 2_665 ?
Cl1 Cl1 C2 48.6(6) 3_565 2_665 ?
C2 Cl1 C2 47.9(13) 3_565 2_665 ?
C2 Cl1 C2 47.9(13) . 2_665 ?
 
_refine_diff_density_max    1.152
_refine_diff_density_min   -1.116
_refine_diff_density_rms    0.222

_shelx_res_file
;

    shelxl.res created by SHELXL-2014/7


TITL shelxl in P6(3)mc
CELL 0.71073   9.4016   9.4016   6.9774  90.000  90.000 120.000
ZERR   2   0.0024   0.0024   0.0072   0.000   0.000   0.000
LATT -1
SYMM -Y, X-Y, Z
SYMM -X+Y, -X, Z
SYMM -X, -Y, 0.5+Z
SYMM Y, -X+Y, 0.5+Z
SYMM X-Y, X, 0.5+Z
SYMM -Y, -X, Z
SYMM -X+Y, Y, Z
SYMM X, X-Y, Z
SYMM Y, X, 0.5+Z
SYMM X-Y, -Y, 0.5+Z
SYMM -X, -X+Y, 0.5+Z
SFAC C H N CL BR CD
UNIT 8 22 2 2 6 2

L.S. 34
BOND
ACTA
TEMP -180
FMAP 2
PLAN 20
DFIX 1.5 N1 C1 N1 C2
DFIX 1.7 0.001 C2 CL1
DFIX 2.7 0.001 CL1 N1

SUMP 0.33333 0 1 2
SUMP 0.66667 0 1 3
ISOR C1 C2 CL1
SIMU 0.001 C1 C2
TWIN
WGHT    0.082600    3.641000
BASF   0.44212
FVAR       5.93627   0.33332   0.66667
CD1   6    1.000000    1.000000    0.576804    10.16667    0.03684    0.03684 =
         0.01895    0.00000    0.00000    0.01842
BR1   5    0.734672    0.867336    0.833655    10.50000    0.04222    0.06032 =
         0.03334   -0.00259   -0.00518    0.02111
N1    3    0.333333    0.666667    1.240817    10.16667    0.04716    0.04716 =
         0.09125    0.00000    0.00000    0.02358
C2    1    0.392956    0.607044    1.404223    30.50000    0.09831    0.09831 =
         0.03125   -0.01892    0.01892    0.02765
C1    1    0.416546    0.583454    1.168538    30.50000    0.09819    0.09819 =
         0.03103   -0.01889    0.01889    0.02782
CL1   4    0.287351    0.574702    1.612592    20.50000    0.07648    0.07184 =
         0.06266    0.03087    0.01543    0.03592
HKLF 4

REM  shelxl in P6(3)mc
REM R1 =  0.0563 for     387 Fo > 4sig(Fo)  and  0.0625 for all     446 data
REM     34 parameters refined using     31 restraints

END

WGHT      0.0788      4.2405

REM Highest difference peak  1.152,  deepest hole -1.116,  1-sigma level  0.222
Q1    1   0.3333  0.6667  1.3406  10.16667  0.05    0.99
Q2    1   0.8779  0.9389  0.8415  10.50000  0.05    0.70
Q3    1   0.3733  0.4905  1.2694  11.00000  0.05    0.70
Q4    1   0.5930  0.7965  0.8528  10.50000  0.05    0.69
Q5    1   0.3826  0.6174  1.1730  10.50000  0.05    0.66
Q6    1   0.4230  0.5770  1.5505  10.50000  0.05    0.63
Q7    1   0.3988  0.5389  1.2425  11.00000  0.05    0.63
Q8    1   0.8659  1.1341  0.8288  10.50000  0.05    0.63
Q9    1   0.3588  0.6412  1.0210  10.50000  0.05    0.61
Q10   1   0.4636  0.5364  1.3308  10.50000  0.05    0.57
Q11   1   0.3821  0.6179  1.4855  10.50000  0.05    0.55
Q12   1   0.4332  0.5668  1.4116  10.50000  0.05    0.54
Q13   1   0.3729  0.4911  1.3910  11.00000  0.05    0.53
Q14   1   0.2530  0.6265  1.8314  10.50000  0.05    0.51
Q15   1   0.9172  0.8344  0.6723  10.50000  0.05    0.50
Q16   1   0.6615  0.7238  0.9382  11.00000  0.05    0.50
Q17   1   1.0816  1.1631  0.4912  10.50000  0.05    0.48
Q18   1   0.2993  0.4400  1.1506  11.00000  0.05    0.47
Q19   1   0.9571  0.9141  0.7534  10.50000  0.05    0.44
Q20   1   0.8380  0.9190  0.9910  10.50000  0.05    0.44
;
_shelx_res_checksum    1250

_shelx_hkl_file
;
   0   0   1  805.83  254.29   1 0.94826-0.94826 0.31334-0.31334 0.05096 0.05096
   0   0   1  397.74  233.68   1-0.30935 0.30935 0.94958-0.94958 0.05085 0.05085
   0   0  -1  438.00  253.12   1-0.23312 0.23312 0.97111-0.97111-0.05085-0.05085
   0   0  -2202091.6 4089.97   1 0.79552-0.79552 0.59728-0.59728-0.10191-0.10191
   0   0   2198218.1 3975.79   1 0.97293-0.97293 0.20737-0.20737 0.10193 0.10193
   0   0  -2201363.0 4451.40   1-0.19330 0.19330 0.97585-0.97585-0.10171-0.10171
   0   0  -3  266.26  521.47   1 0.71787-0.71787 0.67918-0.67918-0.15286-0.15286
   0   0   3  126.74  359.02   1 0.98365-0.98365 0.09507-0.09507 0.15290 0.15290
   0   0  -4997634.918204.54   1 0.62483-0.62483 0.75370-0.75370-0.20374-0.20374
   0   0   4999998.3 6204.53   1 0.97869-0.97869-0.02434 0.02434 0.20387 0.20387
   0   0  -5  372.59  553.16   1 0.51269-0.51269 0.81993-0.81993-0.25468-0.25468
   0   0  -643947.33 1897.44   1 0.37576-0.37576 0.87487-0.87487-0.30561-0.30561
  -1   1  -6 8757.30 1381.94   1 0.52658-0.57027 0.81287-0.73720-0.24887-0.36236
   1   0  -522242.78 1424.06   1-0.73067 0.81816 0.56181-0.56181-0.38792-0.12238
   0  -1  -522531.68 1169.22   1-0.00256-0.04119 0.91710-0.99289-0.39863-0.11165
  -1   1  -520512.16 1492.84   1 0.62475-0.66844 0.75376-0.67809-0.20378-0.30557
   1   0  -524276.37 1329.20   1 0.74819-0.66090 0.64979-0.64979-0.13409-0.37546
   0   1   521435.45  998.53   1 0.98387-0.94023 0.05658 0.01898 0.16968 0.33998
   1   0  -4421217.9 8634.83   1-0.76569 0.85312 0.52082-0.52082-0.37743-0.03038
   0  -1  -4428751.4 8651.53   1 0.04923-0.09299 0.91970-0.99549-0.38950-0.01872
  -1   1  -4405784.1 8725.62   1 0.70490-0.74855 0.69089-0.61530-0.16052-0.24712
   0   1   4402878.5 7809.67   1 0.95061-0.90698 0.30547-0.22989 0.05485 0.35288
   1   0  -326648.35 1614.52   1-0.75447 0.84190 0.53435-0.53435-0.38109 0.07522
   0  -1  -326129.39 1122.41   1 0.01691-0.06067 0.91838-0.99416-0.39533 0.08915
  -1   1  -322044.23 1536.82   1 0.76949-0.81314 0.62725-0.55166-0.12008-0.18564
   0   1   324360.55 1063.18   1 0.80604-0.76239 0.58431-0.50872-0.09419 0.39993
   1  -1   324242.87 1433.85   1 0.96694-0.92331 0.23980-0.31537 0.08664 0.21915
   1   0  -325871.13 1174.13   1 0.97659-0.88932 0.18282-0.18282 0.11333-0.41914
   0   1   329985.10 2851.41   1-0.24123 0.28479 0.96963-0.89418-0.04031 0.34544
   0  -1  -321542.19 2235.21   1 0.06691-0.11051 0.91372-0.98925-0.40078 0.09575
   1   0  -2 8085.46 1358.50   1-0.66167 0.74916 0.63137-0.63137-0.40440 0.20028
   0  -1  -2 6471.52 1106.76   1-0.15677 0.11302 0.89424-0.97002-0.41922 0.21510
   0   1   2 9865.24  629.80   1 0.42359-0.37990 0.85849-0.78283-0.28904 0.49279
  -1   1  -2 7448.53  948.66   1 0.81823-0.86188 0.56856-0.49297-0.08494-0.11888
  -1   0   211860.52 2781.29   1-0.27404 0.18692 0.96171-0.96171 0.00299 0.20042
   1   0  -2 5370.26 2902.22   1-0.13221 0.21933 0.97529-0.97529-0.17699-0.02642
   0   1   212310.13 2556.38   1-0.09700 0.14056 0.97089-0.89544-0.21896 0.42239
   0  -1  -2 6333.22 1772.77   1 0.13770-0.18130 0.87018-0.94571-0.47308 0.26973
  -1   0   1 1660.43  667.91   1-0.58915 0.50166 0.69240-0.69240-0.41650 0.51856
   0  -1  -1 2879.86  841.38   1-0.51033 0.46658 0.74769-0.82346-0.42486 0.32280
   1   0  -1 2721.51  754.60   1-0.39815 0.48563 0.81038-0.81038-0.42983 0.32777
   0   1   1 1401.64  502.99   1-0.28136 0.32511 0.85865-0.78286-0.42843 0.53048
  -1   1  -1 1836.93  462.77   1 0.84792-0.89156 0.52661-0.45102-0.06083-0.04107
   1  -1   1  898.35  373.33   1 0.91187-0.86823 0.41045-0.48604 0.00228 0.09962
  -1   0   1 1731.66  773.10   1-0.20476 0.11764 0.97491-0.97491-0.08722 0.18893
   1   0  -1 2730.74 1129.95   1-0.12034 0.20746 0.97413-0.97413-0.19125 0.08954
   0   1  -1 1803.59  433.79   1-0.92110 0.96482 0.25614-0.18042-0.29318 0.19122
  -1   0  -1 2951.66 1066.93   1 0.28586-0.37324 0.89833-0.89833-0.33358 0.23171
   1   0   1 1926.56  398.55   1 0.43518-0.34781 0.85409-0.85409-0.28484 0.38671
  -1   1   1 1257.48  232.45   1 0.62421-0.66789 0.75413-0.67846-0.20405 0.30592
   1  -1  -1 2483.38  442.68   1 0.91679-0.87315 0.39927-0.47486 0.00811-0.11002
   0   1  -1 2633.27  488.50   1 0.96408-0.92045-0.11387 0.18945 0.23993-0.34186
  -1   1   1 1596.78  605.51   1 0.15106-0.19466 0.86065-0.78512-0.48627 0.58794
  -1   0  -2 7670.22  847.99   1 0.40673-0.49411 0.86459-0.86459-0.29502 0.09128
   1   0   2 9027.70  755.76   1 0.68413-0.59685 0.70869-0.70869-0.17236 0.37619
   0   1  -2 6894.71  783.93   1 0.98198-0.93834 0.12953-0.05396 0.13758-0.34145
  -1   0  -2 8932.62 1020.08   1-0.26742 0.18030 0.96356-0.96356-0.00583-0.19758
  -1   1   211917.01 2980.19   1-0.06843 0.02487 0.96522-0.88977-0.25229 0.45571
   1  -1  -2 7197.49 2341.79   1 0.09739-0.05379 0.89640-0.97192-0.43241 0.22906
  -1   0  -323326.61 1376.83   1 0.42769-0.51506 0.85696-0.85696-0.28757-0.01804
   1   0   324963.06 1416.37   1 0.83370-0.74642 0.54740-0.54740-0.07268 0.37842
   0   1  -323172.08 1396.98   1 0.94669-0.90306 0.31846-0.24288 0.04843-0.35423
  -1   1   328606.39 1826.77   1-0.19172 0.14816 0.97595-0.90050-0.10369 0.40882
  -1   0  -326212.76 1340.81   1-0.18494 0.09782 0.97632-0.97632-0.11219-0.19293
   1  -1  -4406733.8 7283.75   1-0.68150 0.72525 0.61267-0.68843-0.40022-0.00801
  -1   0  -4416108.4 8615.99   1 0.39731-0.48469 0.86784-0.86784-0.29830-0.10918
   1   0   4385969.6 8181.02   1 0.92284-0.83555 0.38486-0.38486 0.01557 0.39207
  -1   1   4437275.010866.96   1-0.27552 0.23196 0.96127-0.88583 0.00497 0.40186
   1  -1  -524283.27  630.00   1-0.59417 0.63791 0.68852-0.76428-0.41581-0.09449
  -1   0  -524257.18 1574.52   1 0.33325-0.42062 0.88711-0.88711-0.31933-0.19002
   0   1  -521187.41 1498.08   1 0.79108-0.74743 0.60261-0.52702-0.10510-0.40445
  -1   0  -6 7095.09 3299.02   1 0.24047-0.32785 0.90680-0.90680-0.34623-0.26499
   0   1  -6 8381.95 1267.89   1 0.67873-0.63509 0.71313-0.63754-0.17536-0.43610
  -1  -1  -681763.71 2815.47   1-0.10763-0.02362 0.90400-0.97979-0.41374-0.19860
  -1   2  -6113903.7 4233.75   1 0.71345-0.71345 0.68323-0.53205-0.15550-0.45596
  -1  -1  -5 3997.63 1649.81   1-0.03650-0.09476 0.91402-0.98981-0.40401-0.10628
  -2   1   5 4005.95 1698.00   1-0.31280 0.18212 0.94818-0.87273 0.05560 0.45294
  -1  -1  -453999.93 2371.68   1-0.00866-0.12260 0.91663-0.99241-0.39963-0.00859
   2  -1  -448197.09 1542.91   1 0.03144 0.09982 0.91910-0.99488-0.39276-0.01546
   1   1   444924.45 2023.01   1 0.75484-0.62391 0.64293-0.56734-0.12979 0.53744
  -1   2  -443403.36 2311.98   1 0.86448-0.86448 0.50053-0.34935-0.04622-0.36141
  -2   1   458276.92 3477.85   1-0.25029 0.11961 0.96775-0.89230-0.02846 0.43530
  -1  -1  -3 4404.00 1288.49   1-0.03186-0.09939 0.91451-0.99029-0.40330 0.09712
   2  -1  -3 2603.39  649.63   1 0.08204 0.04921 0.92003-0.99581-0.38315 0.07698
   1   1   3 2554.62  631.05   1 0.54321-0.41215 0.80403-0.72836-0.24174 0.54736
  -1   2  -3 2401.80  668.15   1 0.91640-0.91640 0.40019-0.24901 0.00764-0.31337
  -2   1   3 3342.60 1689.56   1-0.17382 0.04313 0.97667-0.90122-0.12606 0.43119
  -1  -1  -3 1854.09  749.52   1 0.12596-0.25677 0.87821-0.95374-0.46137 0.15635
  -2   1   2482249.2 9017.12   1-0.46378 0.33255 0.77579-0.70003-0.42783 0.63195
  -1  -1  -2473481.2 9292.55   1-0.12091-0.01034 0.90160-0.97738-0.41532 0.21120
   2  -1  -2485082.0 8905.58   1 0.22652-0.09546 0.90897-0.98463-0.34993 0.14619
   1   1   2453503.3 8998.74   1 0.25557-0.12451 0.90422-0.82856-0.34213 0.54587
  -1   2  -2470292.9 9606.03   1 0.95377-0.95377 0.29439-0.14324 0.06030-0.26417
   1   1   2474698.1 8738.72   1-0.22991 0.36059 0.97165-0.89620-0.05501 0.25843
  -2   1   2485146.510137.92   1-0.07268-0.05799 0.96618-0.89074-0.24737 0.45079
   1   1   1  478.55  502.25   1-0.07863 0.20990 0.90867-0.83289-0.41002 0.51208
   2  -1  -1  711.23  373.25   1 0.39605-0.26499 0.86827-0.94393-0.29874 0.19686
  -1   2  -1  808.55  727.94   1 0.97622-0.97622 0.18553-0.03438 0.11208-0.21402
   1  -2   1  475.26  550.16   1 0.98223-0.98223 0.01613-0.16728 0.18696-0.08502
  -2   1   1  162.24  285.69   1 0.07743-0.20824 0.90798-0.83246-0.41178 0.51345
  -1  -1   0316273.5 6543.74   1-0.51677 0.38554 0.74355-0.81932-0.42434 0.42434
   1   1   0334386.3 6805.64   1-0.38421 0.51545 0.81701-0.74125-0.42994 0.42994
  -2   1   0326545.0 6578.41   1 0.41094-0.54200 0.86310-0.78743-0.29355 0.29355
   2  -1   0347407.5 6903.94   1 0.54956-0.41850 0.80054-0.87621-0.23897 0.23897
  -1   2   0327462.4 6545.40   1 0.98398-0.98398 0.07557 0.07557 0.16144-0.16144
   1  -2   0335684.9 6636.66   1 0.97148-0.97148-0.07557-0.07557 0.22473-0.22473
  -1  -1   1  778.54  721.23   1-0.74263 0.61149 0.54814-0.62386-0.38474 0.48670
   1   1  -1  730.10  460.65   1-0.59388 0.72511 0.68874-0.61297-0.41585 0.31379
  -2   1  -1  627.77  789.68   1 0.53223-0.66328 0.80992-0.73426-0.24647 0.14460
   2  -1   1  445.60  420.32   1 0.67680-0.54574 0.71468-0.79035-0.17652 0.27839
  -1  -1   2448844.6 9011.09   1-0.90158 0.77043 0.30235-0.37807-0.30939 0.51330
   1   1  -2479773.0 9462.36   1-0.70645 0.83769 0.58770-0.51194-0.39435 0.19022
  -1   2   2476423.6 8722.13   1-0.43607 0.43607 0.79108-0.63955-0.42897 0.63309
  -1   2   2460956.4 8342.54   1 0.96558-0.96558-0.10678 0.25793 0.23714-0.03327
   1   1  -3 3221.62 1411.64   1-0.75395 0.88509 0.53497-0.45925-0.38126 0.07539
  -2   1  -3  715.94  502.43   1 0.56066-0.69172 0.79427-0.71861-0.23405-0.07156
  -1   2   3 1320.37  174.50   1 0.77076-0.77076 0.62586-0.47468-0.11923 0.42496
   1   1  -3 1345.28  456.46   1 0.97535-0.84445-0.05076 0.12634 0.21470-0.52051
  -1   2   3 8362.86 2296.11   1-0.04082 0.04082 0.95798-0.80709-0.28388 0.58901
  -2   1  -447092.05 2307.14   1 0.52492-0.65598 0.81373-0.73806-0.24957-0.15791
   1   1  -448195.01 2099.09   1 0.97706-0.84616 0.17919-0.10361 0.11501-0.52275
  -1   2   444894.43 4082.57   1-0.16995 0.16995 0.97672-0.82582-0.13086 0.53770
   1   1  -5 4733.43 1070.71   1 0.92387-0.79295 0.38231-0.30672 0.01688-0.52644
  -1   2   5 5527.71 2312.04   1-0.26469 0.26469 0.96428-0.81338-0.00946 0.51801
  -2   1  -695985.86 3612.75   1 0.39096-0.52202 0.86997-0.79430-0.30048-0.31075
   1   1  -6107187.5 3660.30   1 0.82639-0.69547 0.55757-0.48198-0.07855-0.53291
  -2   2  -6147244.3 5065.37   1 0.58735-0.67472 0.77833-0.62699-0.22185-0.38938
   0  -2  -5106580.4 2553.39   1-0.49210 0.40461 0.75907-0.91060-0.42618-0.08411
  -2   2  -593059.24 3182.31   1 0.66430-0.75167 0.72463-0.57329-0.18331-0.32604
   2   0  -5114596.2 2537.93   1 0.93912-0.76458 0.34158-0.34158 0.03687-0.54655
   2   0  -4 6793.74 2263.89   1-0.43704 0.61202 0.79056-0.79056-0.42894 0.02069
   0   2   4 7184.52  866.27   1 0.69328-0.60599 0.70099-0.54981-0.16721 0.57486
  -2   2  -4 7631.46 1476.00   1 0.72631-0.81360 0.67128-0.52010-0.14776-0.25988
   2   0  -4 8933.97  882.12   1 0.98316-0.80862 0.03341-0.03341 0.17962-0.58736
   0   2   4 6813.23 2343.78   1-0.21477 0.30189 0.97382-0.82292-0.07446 0.48130
  -2   0   3285855.8 6139.47   1-0.89922 0.72436 0.30750-0.30750-0.31117 0.61703
   0  -2  -3300679.7 6312.06   1-0.51501 0.42752 0.74469-0.89622-0.42448 0.11830
   2   0  -3308169.7 6432.20   1-0.39679 0.57176 0.81104-0.81104-0.42984 0.12366
   0   2   3291189.6 5961.69   1 0.30669-0.21932 0.89370-0.74237-0.32745 0.63307
  -2   2  -3301716.1 7225.55   1 0.77469-0.86198 0.62149-0.47031-0.11655-0.18918
  -2   0   3306538.3 7682.11   1-0.29636 0.12211 0.95450-0.95450 0.03308 0.27204
   0   2   3300738.0 6855.58   1-0.06518 0.15230 0.96446-0.81356-0.25603 0.56116
  -2   0   2529264.710273.94   1-0.67507 0.50009 0.61884-0.61884-0.40162 0.60575
   0  -2  -2564634.510664.50   1-0.61446 0.52697 0.67232-0.82386-0.41281 0.20868
   2   0  -2559624.710938.73   1-0.29307 0.46805 0.85479-0.85479-0.42828 0.22416
   0   2   2527958.010146.85   1-0.15749 0.24500 0.89408-0.74251-0.41929 0.62341
  -2   0   2543019.511407.53   1-0.24586 0.07162 0.96869-0.96869-0.03426 0.23768
   0  -2  -1574697.010890.86   1-0.73975 0.65232 0.55142-0.70286-0.38560 0.28364
  -2   0   1543840.010564.00   1-0.36804 0.19306 0.82442-0.82442-0.42995 0.53201
   2   0  -1549290.010595.33   1-0.12521 0.30022 0.90078-0.90078-0.41581 0.31376
  -2   2  -1533389.610618.42   1 0.82570-0.91298 0.55853-0.40735-0.07910-0.02280
   2  -2   1571593.011289.96   1 0.91669-0.82941 0.39950-0.55068 0.00799 0.09391
  -2   0   1577425.811244.08   1-0.18341 0.00917 0.97638-0.97638-0.11411 0.21582
   2   0  -1524987.310646.48   1-0.04568 0.21992 0.95938-0.95938-0.27836 0.17665
   0  -2   0 4054.20 1202.62   1-0.85482 0.76739 0.39257-0.54401-0.33934 0.33934
   0   2   0 3645.91  998.57   1-0.75322 0.84065 0.53583-0.38439-0.38149 0.38149
  -2   0   0 3386.68 1418.24   1-0.08750-0.08750 0.90733-0.90733-0.41120 0.41120
   2   0   0 4253.29 1401.05   1 0.08750 0.08750 0.91998-0.91998-0.38205 0.38205
  -2   2   0 2884.57  751.46   1 0.81579-0.90307 0.57178-0.42060-0.08682 0.08682
   2  -2   0 3233.67  713.69   1 0.90635-0.81907 0.42249-0.57367-0.00403 0.00403
  -2   0   0 3352.79 1103.09   1-0.08712-0.08712 0.96914-0.96914-0.23056 0.23056
   2   0   0 3160.03  967.77   1 0.08720 0.08720 0.90242-0.90242-0.42192 0.42192
   0  -2   1531453.910503.78   1-0.93545 0.84802 0.21696-0.36840-0.27900 0.38096
   0   2  -1516380.610126.23   1-0.85187 0.93931 0.39757-0.24613-0.34093 0.23897
  -2   0  -1559861.510974.73   1 0.10359-0.27860 0.91968-0.91968-0.37874 0.27668
   2   0   1543835.310662.38   1 0.30777-0.13303 0.89345-0.89345-0.32713 0.42900
   2  -2  -1584613.610859.04   1 0.92177-0.83449 0.38745-0.53863 0.01423-0.11614
  -2   0  -2541221.910766.32   1 0.20721-0.38223 0.91170-0.91170-0.35476 0.15065
   0   2  -2543974.310880.43   1 0.97665-0.88938-0.04126 0.19241 0.21082-0.41469
  -2   2   2546232.611547.50   1 0.10536-0.19257 0.89151-0.74047-0.44055 0.64390
  -2   0  -3306104.2 6939.88   1 0.24757-0.42231 0.90562-0.90562-0.34432 0.03870
   0   2  -3306605.7 7011.37   1 0.98226-0.89500 0.12524 0.02591 0.13950-0.44531
  -2   0  -3300822.7 6028.87   1-0.20738 0.03314 0.97465-0.97465-0.08388-0.22124
  -2   0  -4 8557.19 2448.87   1 0.24319-0.41794 0.90635-0.90635-0.34550-0.06198
   0   2  -4 7380.26 1164.63   1 0.95770-0.87043 0.27973-0.12858 0.06745-0.47519
  -2   2   4 8344.10 4301.43   1-0.15128 0.06416 0.97644-0.82554-0.15382 0.56067
  -2   0  -5106839.5 4602.39   1 0.20476-0.37978 0.91201-0.91201-0.35538-0.15490
   0   2  -5111242.1 3529.99   1 0.90632-0.81904 0.42255-0.27137-0.00406-0.50549
  -2   2   5112495.0 4659.53   1-0.23798 0.15086 0.97024-0.81934-0.04453 0.55308
  -2   0  -6157168.5 6112.32   1 0.13929-0.31431 0.91812-0.91812-0.37099-0.24135
   0   2  -6152151.2 5117.91   1 0.83012-0.74284 0.55242-0.40124-0.07557-0.53589
  -2   2   6163093.8 7147.75   1-0.30948 0.22236 0.94953-0.79863 0.05103 0.55922
  -1   3  -717811.68 2225.29   1 0.73962-0.69598 0.65839-0.43162-0.13953-0.57385
  -2  -1  -6113949.4 4974.43   1-0.12697-0.09179 0.90044-0.97623-0.41602-0.19632
  -1   3  -6121258.7 5273.39   1 0.82228-0.77863 0.56317-0.33640-0.08179-0.52967
  -3   2   696599.41 6030.45   1-0.29311 0.11887 0.95564-0.80474 0.02867 0.58159
  -2  -1  -568125.49 3203.98   1-0.07671-0.14205 0.90895-0.98474-0.40976-0.10052
  -1   3  -566561.09 3190.30   1 0.88626-0.84262 0.46247-0.23571-0.02538-0.48417
  -3   2   572052.11 3875.96   1-0.22640 0.05216 0.97221-0.82131-0.05953 0.56808
  -2  -1  -423631.07 2121.51   1-0.05903-0.15973 0.91137-0.98715-0.40732-0.00091
  -1   3  -425508.43 3530.87   1 0.93344-0.88980 0.35748-0.13071 0.02956-0.43721
  -3   2   427240.52 7790.79   1-0.14863-0.02560 0.97633-0.82544-0.15706 0.56390
  -3   2   377481.96 2088.93   1-0.52159 0.34662 0.74041-0.58887-0.42393 0.73011
  -2  -1  -375205.94 3026.10   1-0.07787-0.14089 0.90878-0.98457-0.40992 0.10375
   3  -2  -380285.69 2019.20   1 0.74841-0.57384 0.64956-0.80074-0.13395-0.17178
  -1   3  -376683.42 3192.38   1 0.96499-0.92136 0.24901-0.02228 0.08225-0.38805
  -3   2   379677.06 3629.92   1-0.05513-0.11910 0.96195-0.81105-0.26757 0.57271
  -2  -1  -2393000.6 8697.56   1-0.13936-0.07940 0.89797-0.97375-0.41739 0.21328
  -3   2   2393963.2 7839.00   1 0.07645-0.25147 0.92004-0.76847-0.38427 0.58838
   3  -2  -2391199.0 7608.01   1 0.68422-0.50965 0.70862-0.85980-0.17231-0.03150
  -1   3  -2390751.1 8713.24   1 0.98120-0.93756 0.13990 0.08682 0.13291-0.33678
  -3   2   2328341.8 7830.09   1 0.06168-0.23610 0.91648-0.76543-0.39528 0.59863
  -2  -1  -1171074.7 4540.88   1-0.24850 0.02973 0.86959-0.94537-0.42667 0.32462
  -3   2   1140097.7 3586.69   1 0.39526-0.57000 0.86853-0.71720-0.29901 0.40088
   3  -2  -1170724.4 4038.91   1 0.69234-0.51777 0.70180-0.85298-0.16774 0.06583
  -1   3  -1172818.4 4614.84   1 0.98311-0.93948 0.03225 0.19447 0.18012-0.28205
   2   1   1160263.1 3182.91   1-0.07597 0.29399 0.96709-0.89156-0.24281 0.34448
  -1   3   010271.13 2740.41   1-0.90613 0.94985 0.29216-0.06501-0.30587 0.30587
  -2  -1   011210.28 2425.02   1-0.40247 0.18375 0.80827-0.88404-0.42977 0.42977
  -3   2   012429.63 1302.95   1 0.54335-0.71809 0.80396-0.65262-0.24168 0.24168
   3  -2   013598.93 1266.12   1 0.73057-0.55601 0.66722-0.81840-0.14515 0.14515
  -1   3   012080.53 1143.64   1 0.97248-0.92885-0.06959 0.29632 0.22232-0.22232
   2   1   010145.00 1688.34   1-0.21534 0.43315 0.97374-0.89830-0.07373 0.07373
  -1   3   1166011.8 4116.99   1-0.81267 0.85639 0.45848-0.23133-0.35964 0.46159
  -3   2  -1144588.7 4157.50   1 0.60562-0.78037 0.76666-0.61532-0.21317 0.11129
   1  -3  -2377093.1 7547.95   1-0.93348 0.88977 0.22267-0.44983-0.28109 0.07718
  -2  -1   2380382.9 8377.63   1-0.75662 0.53804 0.53180-0.60751-0.38041 0.58432
  -1   3   2370205.7 7593.76   1-0.58375 0.62750 0.69653-0.46922-0.41722 0.62134
  -3   2  -2353471.3 8158.68   1 0.62197-0.79672 0.75568-0.60434-0.20516 0.00142
   1  -3  -367167.92 2445.28   1-0.92616 0.88245 0.24292-0.47008-0.28844-0.01742
  -2  -1   369845.10 3622.20   1-0.89162 0.67305 0.32361-0.39932-0.31666 0.62252
  -1   3   376436.75 2170.68   1-0.11152 0.15527 0.90332-0.67596-0.41421 0.72038
  -3   2  -367916.87 3261.11   1 0.61017-0.78491 0.76366-0.61233-0.21097-0.09464
  -1   3   376398.66 3013.48   1 0.10308-0.05947 0.89293-0.66636-0.43822 0.74325
  -1   3   423202.33  995.24   1 0.56404-0.52036 0.79232-0.56532-0.23253 0.64002
  -3   2  -420528.51 1945.51   1 0.57817-0.75292 0.78395-0.63262-0.22610-0.18138
   2   1  -420858.09 1568.66   1 0.96834-0.75017-0.09294 0.16852 0.23166-0.63940
  -1   3   424700.86 4714.92   1-0.06107 0.10463 0.96346-0.73711-0.26077 0.66761
  -3   2  -569309.64 3423.43   1 0.52939-0.70414 0.81141-0.66008-0.24768-0.26168
   2   1  -567902.03 2606.34   1 0.98130-0.76313 0.13865-0.06307 0.13348-0.64315
  -1   3   572121.42 4055.30   1-0.18495 0.22851 0.97632-0.74997-0.11218 0.62074
  -3   2  -698209.22 4070.98   1 0.46482-0.63956 0.84202-0.69069-0.27374-0.33749
  -1   3   6112118.6 5095.51   1-0.28141 0.32497 0.95950-0.73315 0.01286 0.59739
  -3   2  -713306.33 1646.76   1 0.38375-0.55849 0.87233-0.72099-0.30293-0.41017
  -2   3  -716553.44 2129.00   1 0.63917-0.68286 0.74353-0.51653-0.19649-0.51661
  -2   3  -6123391.8 5161.40   1 0.72197-0.76561 0.67537-0.44860-0.15040-0.46106
  -1  -2  -570242.48 7174.50   1-0.36034 0.18537 0.82784-0.97937-0.42991-0.08038
  -2   3  -569192.89 3926.56   1 0.78989-0.83353 0.60401-0.37724-0.10595-0.40360
  -3   1   576735.72 5207.16   1-0.29917 0.08137 0.95348-0.87803 0.03692 0.47163
  -1  -2  -423024.01 4066.72   1-0.34810 0.17313 0.83312-0.98466-0.42978 0.02154
   3  -1  -422364.29 1521.31   1 0.12256 0.09620 0.91901-0.99479-0.37469-0.03353
  -2   3  -420192.57 1825.45   1 0.84444-0.88808 0.53182-0.30505-0.06378-0.34385
  -3   1   424094.29 4613.76   1-0.24127 0.02346 0.96962-0.89417-0.04026 0.44710
  -3   1   371529.79 2356.12   1-0.68490 0.46618 0.60936-0.53359-0.39946 0.70565
  -1  -2  -376420.92 3232.95   1-0.37847 0.20350 0.81968-0.97121-0.42996 0.12378
   3  -1  -374610.04 2303.43   1 0.13405 0.08471 0.91843-0.99421-0.37216 0.06599
  -2   3  -372566.85 3306.85   1 0.88698-0.93062 0.46113-0.23436-0.02465-0.28107
  -3   1   369211.94 3786.42   1-0.17388-0.04392 0.97667-0.90122-0.12598 0.43112
   1   2   377079.32 2301.68   1-0.14675 0.32099 0.97625-0.82535-0.15935 0.46449
  -1  -2  -2410580.2 9662.11   1-0.45063 0.27565 0.78318-0.93471-0.42842 0.22430
  -3   1   2384542.4 8026.38   1-0.32680 0.10808 0.84192-0.76615-0.42938 0.63350
   3  -1  -2398508.1 7997.51   1 0.20144 0.01732 0.91242-0.98821-0.35622 0.15210
  -2   3  -2390759.1 8820.87   1 0.91855-0.96219 0.39516-0.16840 0.01024-0.21407
  -3   1   2405565.0 9644.12   1-0.09150-0.12629 0.96995-0.89450-0.22542 0.42885
  -1  -2  -1177712.1 4743.37   1-0.55757 0.38259 0.71580-0.86734-0.42039 0.31833
   3  -1  -1174009.7 4318.62   1 0.30271-0.08428 0.89462-0.97029-0.32864 0.22677
  -2   3  -1171795.0 4682.83   1 0.94001-0.98366 0.33889-0.11212 0.03894-0.14085
  -3   1   1163603.3 4346.45   1 0.01697-0.23499 0.93756-0.86204-0.34738 0.44905
  -1  -2   014690.05 3115.76   1-0.68269 0.50771 0.61151-0.76305-0.39996 0.39996
  -3   1   012412.41 1361.95   1 0.19387-0.41264 0.91332-0.83754-0.35811 0.35811
   3  -1   013083.73 1053.06   1 0.42015-0.20172 0.85977-0.93543-0.29028 0.29028
  -2   3   012751.37 1222.33   1 0.95198-0.99561 0.30077-0.07404 0.05717-0.05717
   2  -3   011966.92 1055.63   1 0.98399-0.94036 0.07180-0.29853 0.16309-0.16309
  -3   1   013582.86 1734.22   1 0.17087-0.38888 0.84570-0.77018-0.50554 0.50554
  -1  -2   1169357.7 4621.12   1-0.80327 0.62841 0.47177-0.62321-0.36355 0.46551
  -3   1  -1166590.7 4532.98   1 0.31449-0.53292 0.89185-0.81618-0.32510 0.22323
  -2   3   1168362.1 4040.14   1 0.95293-0.99656 0.29742-0.07069 0.05881 0.04312
   2  -3  -1174372.0 4029.33   1 0.97561-0.93198-0.04890-0.17782 0.21394-0.31588
  -2   3   2390657.5 7696.52   1-0.89293 0.84922 0.32089-0.09374-0.31574 0.51965
  -3   1  -2368627.6 8283.55   1 0.37225-0.59068 0.87596-0.80029-0.30678 0.10304
  -2   3   2402362.7 7805.98   1 0.93056-0.97420 0.36523-0.13846 0.02563 0.17819
  -3   1  -371507.34 3214.89   1 0.38763-0.60606 0.87107-0.79540-0.30162-0.00399
  -2   3   378112.32 1780.76   1 0.75198-0.79562 0.64590-0.41913-0.13165 0.43739
   1   2  -371378.57 2837.76   1 0.96099-0.78646-0.12766 0.27881 0.24531-0.55112
  -2   3   373145.26 3568.20   1 0.08481-0.12841 0.90380-0.67723-0.41944 0.72446
  -3   1  -424989.90 2226.20   1 0.37288-0.59131 0.87576-0.80009-0.30657-0.10091
   1   2  -424104.67 1831.08   1 0.98379-0.80925 0.05263 0.09851 0.17139-0.57913
  -2   3   429543.05 6363.88   1-0.05170 0.00814 0.96104-0.73470-0.27150 0.67834
  -3   1  -560303.06 2974.65   1 0.33462-0.55306 0.88674-0.81107-0.31890-0.19045
   1   2  -571590.35 3028.88   1 0.96932-0.79478 0.22776-0.07660 0.09235-0.60203
  -2   3   571671.06 4689.26   1-0.16094 0.11738 0.97669-0.75034-0.14198 0.65053
  -3   1  -6106985.1 4261.04   1 0.27586-0.49429 0.90038-0.82471-0.33645-0.27478
   1   2  -6117243.8 4517.30   1 0.91877-0.74421 0.39463-0.24345 0.01052-0.62199
  -2   3   6131196.4 6331.99   1-0.25053 0.20697 0.96769-0.74135-0.02814 0.63840
  -3   3  -742920.16 3197.74   1 0.53447-0.66553 0.80873-0.58173-0.24551-0.46759
  -3   3  -6144292.2 5681.51   1 0.61220-0.74326 0.76230-0.53530-0.20997-0.40125
   0  -3  -5116453.4 2770.11   1-0.72441 0.59318 0.56867-0.79597-0.38965-0.12064
  -3   3  -5104962.1 4021.21   1 0.67574-0.80680 0.71554-0.48854-0.17710-0.33225
   3   0  -5109821.9 2745.07   1 0.98281-0.72100 0.02604-0.02604 0.18276-0.69244
   0   3   5104019.5 3487.34   1-0.23309 0.36377 0.97112-0.74477-0.05089 0.55944
  -3   0   4 5825.11 1834.92   1-0.91389 0.65160 0.27401-0.27401-0.29952 0.70734
   0  -3  -4 7816.93 2252.46   1-0.69758 0.56635 0.59677-0.82408-0.39652-0.01171
   0   3   4 4550.17  661.73   1 0.34563-0.21458 0.88376-0.65675-0.31543 0.72292
  -3   3  -4 6765.96 1668.16   1 0.72631-0.85724 0.67128-0.44452-0.14776-0.25988
   0   3   4 7722.23 1965.76   1-0.09419 0.22488 0.97042-0.74407-0.22226 0.62910
  -3   0   3245079.9 6141.80   1-0.75404 0.49175 0.53486-0.53486-0.38123 0.68709
   0  -3  -3239677.2 5647.18   1-0.71145 0.58022 0.58250-0.80980-0.39308 0.08690
   0   3   3221142.2 5299.52   1-0.02651 0.15777 0.91504-0.68769-0.40247 0.70865
  -3   3  -3250536.8 6876.05   1 0.76467-0.89560 0.63250-0.40573-0.12332-0.18241
  -3   0   3250950.0 7115.67   1-0.28621 0.02485 0.95796-0.95796 0.01933 0.28579
   0   3   3243241.7 5802.75   1 0.10739 0.02341 0.89025-0.66368-0.44262 0.74764
   0  -3  -2529020.710867.42   1-0.75421 0.62306 0.53466-0.76181-0.38117 0.17726
  -3   0   2526574.111008.41   1-0.53905 0.27659 0.72873-0.72873-0.42233 0.62645
  -3   0   2557087.412155.33   1-0.24122-0.02013 0.96963-0.96963-0.04032 0.24374
   0  -3  -1289854.5 6647.11   1-0.81387 0.68272 0.45676-0.68391-0.35913 0.25717
  -3   0   1285871.6 6759.51   1-0.31795 0.05548 0.84542-0.84542-0.42914 0.53120
  -3   0   1293335.1 6815.60   1-0.19112-0.07024 0.97599-0.97599-0.10445 0.20616
   0  -3   016151.75 2677.91   1-0.87608 0.74493 0.35437-0.58152-0.32695 0.32695
  -3   0   017432.44 1718.31   1-0.13126-0.13126 0.89960-0.89960-0.41650 0.41650
  -3   3   017628.18 1472.91   1 0.78806-0.91899 0.60617-0.37940-0.10724 0.10724
  -3   0   017138.29 1236.30   1-0.13068-0.13068 0.97516-0.97516-0.17884 0.17884
   3   0   015301.49 1706.42   1 0.13081 0.13081 0.87494-0.87494-0.46622 0.46622
   0  -3   1274382.2 6702.43   1-0.92938 0.79823 0.23421-0.46136-0.28529 0.38724
  -3   0  -1283399.3 6745.53   1 0.00347-0.26600 0.91754-0.91754-0.39762 0.29556
   3  -3  -1275340.9 6152.44   1 0.93563-0.80471 0.35145-0.57821 0.03262-0.13453
  -3   3   3235418.2 4626.63   1 0.07865-0.20992 0.92004-0.69269-0.38383 0.69000
  -3   0  -3248646.0 7164.70   1 0.12625-0.38877 0.91883-0.91883-0.37389 0.06771
   0   3  -3252185.6 6591.70   1 0.98312-0.85222 0.03254 0.19418 0.17999-0.48580
  -3   0  -3241822.3 4721.51   1-0.20016-0.06120 0.97533-0.97533-0.09305-0.21207
  -3   3   3238277.8 7534.96   1 0.05864-0.18945 0.91806-0.69149-0.39207 0.69709
  -3   0  -4 7191.17 3944.21   1 0.13108-0.39361 0.91859-0.91859-0.37282-0.03540
   0   3  -4 5740.70 1509.72   1 0.97837-0.84747 0.16854 0.05818 0.11990-0.52764
  -3   0  -4 4907.78 1671.28   1-0.08552-0.17583 0.96884-0.96884-0.23242-0.17441
  -3   3   4 7546.55 4891.61   1-0.05641-0.07427 0.96228-0.73594-0.26611 0.67295
  -3   0  -5113321.6 4429.32   1 0.10741-0.36994 0.91957-0.91957-0.37793-0.13235
   0   3  -5118869.3 4258.38   1 0.95166-0.82076 0.30187-0.07513 0.05663-0.56630
  -3   3   5109388.7 4630.20   1-0.15248 0.02180 0.97649-0.75014-0.15236 0.66091
  -3   0  -6144775.2 6154.16   1 0.05887-0.32139 0.91990-0.91990-0.38768-0.22466
   0   3  -6147917.1 5597.02   1 0.90217-0.77124 0.43128-0.20451-0.00868-0.60278
  -3   3   6147718.4 6528.04   1-0.23439 0.10371 0.97089-0.74454-0.04920 0.65946
  -3   3   743273.19 4268.60   1-0.30546 0.17478 0.95111-0.72476 0.04551 0.66645
  -1   4  -7 2817.12 1294.26   1 0.81818-0.73089 0.56864-0.26628-0.08498-0.62839
  -4   3   7 2302.12 1265.00   1-0.29512 0.07732 0.95494-0.72859 0.03140 0.68056
  -3  -1  -623208.23 4585.83   1-0.15755-0.14872 0.89406-0.96985-0.41930-0.19304
  -1   4  -629653.55 2717.26   1 0.88278-0.79550 0.46888-0.16652-0.02885-0.58261
  -4   3   619841.45 2567.05   1-0.22899 0.01118 0.97180-0.74545-0.05619 0.66645
  -3  -1  -5 6885.58 2343.47   1-0.11915-0.18712 0.90193-0.97771-0.41511-0.09517
  -1   4  -5 5983.79 1668.42   1 0.93002-0.84274 0.36665-0.06429 0.02490-0.53446
  -4   3   5 4647.34 1922.31   1-0.15472-0.06308 0.97656-0.75021-0.14962 0.65817
  -4   3   485238.14 1142.92   1-0.78128 0.56256 0.50138-0.27408-0.37175 0.77999
  -3  -1  -493443.70 4018.21   1-0.10694-0.19933 0.90413-0.97991-0.41365 0.00542
  -1   4  -493328.21 3994.38   1 0.96183-0.87457 0.26297 0.03933 0.07555-0.48330
   4  -3  -482101.64  994.20   1 0.98387-0.76570 0.05670-0.28343 0.16963-0.57737
  -4   3   499961.79 5985.97   1-0.07026-0.14753 0.96564-0.73930-0.25017 0.65701
  -3  -1  -321312.33 2473.71   1-0.12310-0.18317 0.90118-0.97697-0.41557 0.10940
  -4   3   317652.43 1147.54   1-0.06753-0.15124 0.91025-0.68289-0.40851 0.71468
   4  -3  -317748.06 1061.88   1 0.88620-0.66799 0.46258-0.68935-0.02544-0.28029
  -1   4  -318346.98 2147.63   1 0.97925-0.89198 0.16066 0.14164 0.12350-0.42930
  -4   3   317615.47 4181.32   1 0.02750-0.24552 0.93300-0.70643-0.35880 0.66382
  -3  -1  -283914.10 3958.61   1-0.17070-0.13557 0.89104-0.96682-0.42059 0.21647
  -4   3   288419.21 3024.01   1 0.30091-0.51934 0.89503-0.66803-0.32917 0.53292
  -1   4  -284842.72 3628.95   1 0.98394-0.89667 0.06146 0.24084 0.16757-0.37144
  -4   3   292911.83 4015.66   1 0.13913-0.35715 0.86918-0.64261-0.47450 0.67785
  -3  -1  -129247.95 2478.16   1-0.25215-0.05412 0.86843-0.94421-0.42689 0.32483
  -4   3   127932.15 1790.55   1 0.48954-0.70797 0.83102-0.60402-0.26407 0.36595
  -1   4  -127322.04 1917.92   1 0.97786-0.89059-0.03159 0.33390 0.20685-0.30879
   3   1   126012.97 1082.83   1 0.10474 0.20047 0.89190-0.81637-0.43992 0.54160
  -3  -1   0247631.9 6445.19   1-0.36662 0.06041 0.82506-0.90082-0.42995 0.42995
  -1   4   0249074.5 6225.29   1 0.96394-0.87668-0.11451 0.41682 0.24018-0.24018
   3   1   0228295.4 5187.80   1-0.07753 0.38245 0.96723-0.89178-0.24174 0.24174
  -3  -1   127534.21 3516.29   1-0.50675 0.20054 0.74996-0.82573-0.42514 0.52720
  -4   3  -127902.68 2295.94   1 0.62613-0.84456 0.75280-0.52580-0.20309 0.10122
   1  -4  -285614.14 3206.62   1-0.93211 0.84468 0.22659-0.52946-0.28252 0.07861
  -3  -1   279582.17 3455.08   1-0.65773 0.35152 0.63498-0.71075-0.40519 0.60931
  -4   3  -282043.17 3699.66   1 0.63675-0.85519 0.74527-0.51827-0.19772-0.00601
   1  -4  -319030.68 1527.60   1-0.92755 0.84012 0.23920-0.54207-0.28710-0.01876
  -3  -1   318823.49 2476.23   1-0.79872 0.49271 0.47804-0.55376-0.36538 0.67124
  -1   4   311016.42 3871.78   1-0.31972 0.40721 0.84472-0.54166-0.42919 0.73537
  -4   3  -315891.21 1955.73   1 0.62588-0.84431 0.75297-0.52597-0.20322-0.10239
  -3  -1   486044.89 3279.33   1-0.90913 0.60313 0.28526-0.36097-0.30346 0.71128
  -1   4   477586.52 2022.22   1 0.10274-0.01523 0.91970-0.61656-0.37892 0.78715
  -4   3  -492187.79 4504.81   1 0.59843-0.81686 0.77132-0.54432-0.21661-0.19087
  -1   4   496793.20 3607.10   1 0.04017 0.04702 0.92718-0.62509-0.37243 0.77913
  -4   3  -5 4272.90 1575.57   1 0.55667-0.77510 0.79655-0.56955-0.23583-0.27353
   3   1  -5 3618.48  926.82   1 0.97293-0.66749-0.06679 0.14237 0.22119-0.73087
  -1   4   5 5303.44 2891.20   1-0.10671 0.19383 0.97239-0.67060-0.20749 0.71604
  -4   3  -627562.48 2854.24   1 0.50127-0.71970 0.82550-0.59850-0.25935-0.35187
  -1   4   623872.80 7199.66   1-0.22364 0.31076 0.97262-0.67083-0.06309 0.67336
  -2   4  -7 1927.35 1240.58   1 0.73753-0.73753 0.66045-0.35809-0.14083-0.57254
  -2  -2  -6 4889.15 2011.39   1-0.36341 0.10094 0.82648-0.97802-0.42993-0.18242
  -2   4  -6 5862.28 1747.91   1 0.80796-0.80796 0.58188-0.27952-0.09276-0.51871
  -4   2   6 3438.31 1948.75   1-0.28678 0.02541 0.95778-0.80688 0.02010 0.59015
  -2  -2  -5  559.56  689.48   1-0.32328 0.06082 0.84332-0.99485-0.42929-0.08101
  -2   4  -5 1478.07 1475.46   1 0.86381-0.86381 0.50162-0.19926-0.04683-0.46272
  -4   2   5  310.00 1270.78   1-0.22556-0.03579 0.97234-0.82144-0.06061 0.56916
  -4   2   4327561.6 4086.15   1-0.78084 0.51854 0.50178-0.35034-0.37215 0.77997
  -2  -2  -4323113.4 6985.85   1-0.31410 0.05164 0.84691-0.99844-0.42903 0.02079
   4  -2  -4325732.3 3287.64   1 0.60101-0.33889 0.76966-0.92100-0.21538-0.19210
  -2   4  -4317776.8 6837.91   1 0.90689-0.90689 0.42134-0.11899-0.00343-0.40421
  -4   2   4324911.6 7436.01   1-0.15652-0.10484 0.97661-0.82571-0.14742 0.55426
  -4   2   3  645.07  689.64   1-0.38313 0.12067 0.81752-0.66598-0.42995 0.73613
  -2  -2  -3  905.17  681.70   1-0.33628 0.07382 0.83807-0.98960-0.42958 0.12340
   4  -2  -3  793.95  539.86   1 0.53336-0.27125 0.80932-0.96066-0.24598-0.05963
  -2   4  -3  449.20 1012.03   1 0.93860-0.93860 0.34303-0.04067 0.03686-0.34260
  -4   2   3  968.95  934.22   1-0.07697-0.18438 0.96711-0.81622-0.24239 0.54752
  -2  -2  -2 1875.07 1004.06   1-0.39010 0.12764 0.81424-0.96577-0.42991 0.22579
  -4   2   2 4449.39 1402.00   1-0.04171-0.22080 0.91345-0.76188-0.40479 0.60891
  -2   4  -2 1263.46  677.93   1 0.96041-0.96041 0.26891 0.03338 0.07269-0.27656
  -4   2   2 1897.69  799.39   1 0.01739-0.27901 0.93739-0.78634-0.34784 0.55118
  -2  -2  -1  964.69  608.22   1-0.47336 0.21090 0.77026-0.92180-0.42733 0.32527
  -4   2   1  284.65  503.03   1 0.19321-0.45574 0.91340-0.76183-0.35827 0.46033
  -2   4  -1  488.71  923.78   1 0.97358-0.97358 0.20334 0.09896 0.10381-0.20575
  -4   2   1  549.76  804.01   1 0.13023-0.39185 0.87533-0.72428-0.46565 0.56732
  -2  -2   0662854.313686.19   1-0.57913 0.31666 0.70002-0.85155-0.41782 0.41782
  -4   2   0627304.112909.38   1 0.33687-0.59899 0.88614-0.73481-0.31820 0.31820
  -2   4   0629084.512808.57   1 0.98021-0.98021 0.15115 0.15115 0.12782-0.12782
  -2  -2   1  653.26  871.63   1-0.69518 0.43271 0.59919-0.75073-0.39709 0.49915
  -2   4   1  424.83  589.50   1 0.98255-0.98255 0.12060 0.18170 0.14158-0.03964
  -2  -2   2  963.01  817.19   1-0.80603 0.54374 0.46792-0.61935-0.36242 0.56633
  -2   4   2  814.61  407.73   1-0.80942 0.80942 0.46313-0.16026-0.36102 0.56493
  -4   2  -2 1424.32  818.46   1 0.45191-0.71403 0.84742-0.69609-0.27863 0.07489
  -2   4   2  616.82  362.98   1 0.98221-0.98221 0.12606 0.17624 0.13913 0.06473
  -2   4   3  860.66  522.72   1-0.53193 0.53193 0.73355-0.43048-0.42301 0.72919
  -4   2  -3  233.35  958.93   1 0.45746-0.71958 0.84513-0.69379-0.27654-0.02907
  -2   4   3  499.43  505.62   1 0.97433-0.97433 0.19854 0.10376 0.10605 0.19975
  -4   2  -4288880.6 6204.45   1 0.44033-0.70245 0.85208-0.70074-0.28295-0.12453
  -4   2  -5  976.22 1080.39   1 0.40466-0.66678 0.86531-0.71398-0.29575-0.21360
   2   2  -5  636.23  524.38   1 0.98362-0.72181 0.04577 0.10537 0.17434-0.68401
  -2   4   5  788.97 1232.87   1-0.08654 0.08654 0.96903-0.66724-0.23124 0.73979
  -4   2  -6 6325.72 1949.45   1 0.35231-0.61443 0.88188-0.73054-0.31329-0.29793
   2   2  -6 4189.04 1118.43   1 0.96883-0.70702 0.23035-0.07920 0.09112-0.70274
  -2   4   6 4050.08 2073.19   1-0.19238 0.19238 0.97591-0.67411-0.10286 0.71313
  -4   2  -7  -84.07  635.00   1 0.28353-0.54565 0.89882-0.74748-0.33425-0.37885
  -2   4   7  719.97  704.88   1-0.28171 0.28171 0.95940-0.65761 0.01326 0.69870
  -3   4  -7 2316.57 1318.78   1 0.64720-0.73457 0.73765-0.43498-0.19235-0.52075
  -3   4  -628738.76 2743.17   1 0.71746-0.80475 0.67955-0.37719-0.15310-0.45836
  -1  -3  -5 5074.97 2011.03   1-0.57663 0.35791 0.70189-0.92919-0.41813-0.09216
  -3   4  -5 6148.85 1423.63   1 0.77514-0.86242 0.62100-0.31864-0.11625-0.39330
   4  -1  -5 4835.72  765.26   1 0.96247-0.65703-0.12121 0.04563 0.24280-0.75248
  -4   1   5 6468.31 3412.73   1-0.29578-0.00914 0.95470-0.87925 0.03229 0.47625
  -4   1   496585.62 2973.10   1-0.80213 0.49612 0.47336-0.39764-0.36402 0.77184
  -1  -3  -490660.80 4474.85   1-0.56415 0.34543 0.71107-0.93837-0.41964 0.01140
  -3   4  -491612.40 3991.00   1 0.82135-0.90863 0.56442-0.26206-0.08252-0.32512
  -4   1   4102208.2 4619.16   1-0.24340-0.06152 0.96920-0.89375-0.03748 0.44432
   1   3   486381.99 2387.16   1-0.17444 0.39224 0.97666-0.75031-0.12529 0.53213
  -1  -3  -317919.47 3110.91   1-0.58239 0.36367 0.69756-0.92486-0.41739 0.11121
  -4   1   316805.31 1875.46   1-0.55888 0.25267 0.71487-0.63910-0.42024 0.72642
  -3   4  -317490.49 2102.35   1 0.85713-0.94442 0.51237-0.21001-0.05282-0.25290
  -4   1   319117.47 2076.76   1-0.18504-0.11988 0.97631-0.90086-0.11207 0.41720
   1   3   318468.52 1700.43   1 0.08206 0.13594 0.90537-0.67880-0.41659 0.72162
  -1  -3  -280780.89 4942.47   1-0.62713 0.40841 0.66179-0.88909-0.41075 0.20663
  -4   1   282701.14 3203.45   1-0.30601-0.00019 0.85000-0.77423-0.42877 0.63289
  -3   4  -280463.27 3454.04   1 0.88315-0.97043 0.46821-0.16585-0.02849-0.17533
  -4   1   252668.60 3391.83   1-0.11807-0.18684 0.97387-0.89842-0.19396 0.39738
  -1  -3  -129276.77 2819.36   1-0.69181 0.47309 0.60255-0.82986-0.39788 0.29582
  -3   4  -127374.24 2095.70   1 0.89952-0.98680 0.43672-0.13436-0.01157-0.09034
  -4   1   130658.87 2801.06   1-0.03778-0.26714 0.95708-0.88163-0.28732 0.38903
  -1  -3   0268619.6 6987.95   1-0.76695 0.54838 0.51926-0.74641-0.37700 0.37700
  -4   1   0242742.7 6595.36   1 0.06512-0.37140 0.91999-0.84420-0.38648 0.38648
  -3   4   0241911.7 6162.85   1 0.90514-0.99242 0.42507-0.12271-0.00539 0.00539
  -4   1   0255420.7 6040.17   1 0.06445-0.36968 0.91503-0.83950-0.39819 0.39819
  -1  -3   124574.20 4185.17   1-0.84221 0.62363 0.41352-0.64067-0.34594 0.44790
  -4   1  -123767.81 2994.07   1 0.16849-0.47477 0.91592-0.84014-0.36426 0.26220
  -3   4   129417.47 1853.24   1 0.89548-0.98276 0.44481-0.14245-0.01588 0.11779
  -1  -3   277840.83 3399.60   1-0.90741 0.68883 0.28923-0.51639-0.30485 0.50876
  -4   1  -291589.03 4111.13   1 0.22733-0.53361 0.90890-0.83312-0.34957 0.14545
  -3   4   278057.09 2564.39   1 0.85465-0.94193 0.51628-0.21392-0.05501 0.25884
   3  -4  -271274.10 2255.54   1 0.96340-0.87613-0.11701-0.18529 0.24116-0.44503
  -3   4   315435.57 1929.57   1-0.82803 0.74060 0.43576-0.13289-0.35280 0.65867
  -4   1  -316442.57 2457.96   1 0.25186-0.55766 0.90488-0.82921-0.34315 0.03753
  -3   4   317947.39 1092.35   1 0.71625-0.80354 0.68066-0.37830-0.15383 0.45956
   1   3  -316296.76 1710.50   1 0.95516-0.73699-0.15133 0.37806 0.25446-0.56026
  -3   4   320418.48 4737.28   1 0.15525-0.24245 0.85757-0.55547-0.49037 0.79539
  -4   1  -488835.47 3640.03   1 0.24868-0.55449 0.90543-0.82976-0.34401-0.06347
   1   3  -487799.25 3613.65   1 0.98055-0.76238-0.00579 0.23252 0.19616-0.60390
  -3   4   496627.74 4117.11   1 0.02962-0.11682 0.93206-0.62996-0.36108 0.76778
  -4   1  -5 4115.89 2280.07   1 0.22215-0.52843 0.90966-0.83388-0.35093-0.15936
   1   3  -5 4573.92 1269.25   1 0.98094-0.76277 0.14296 0.08376 0.13153-0.64121
  -3   4   5 5562.59 1814.91   1-0.08148-0.00564 0.96804-0.66625-0.23715 0.74570
  -4   1  -620942.46 7914.38   1 0.17633-0.48261 0.91519-0.83940-0.36239-0.24995
   1   3  -628617.90 2764.00   1 0.95461-0.73644 0.29134-0.06461 0.06179-0.67340
  -3   4   621531.96 8774.39   1-0.17689 0.08977 0.97660-0.67481-0.12224 0.73250
  -4   1  -7 1731.27  803.53   1 0.11139-0.41767 0.91945-0.84366-0.37709-0.33731
  -3   4   7 3755.72 3440.43   1-0.25991 0.17279 0.96550-0.66370-0.01578 0.72776
  -4   4  -7 4072.98 1939.68   1 0.55161-0.72635 0.79940-0.49673-0.23807-0.47503
  -4   4  -681305.61 4086.74   1 0.61841-0.79316 0.75811-0.45544-0.20693-0.40430
   0  -4  -5 9879.55 2783.27   1-0.82408 0.64921 0.44173-0.74460-0.35462-0.15515
  -4   4  -5 7638.62 1726.63   1 0.67273-0.84748 0.71796-0.41529-0.17875-0.33061
  -4   0   416750.77 4042.40   1-0.82544 0.47572 0.43968-0.43968-0.35399 0.76181
   0  -4  -423766.78 4459.66   1-0.79971 0.62484 0.47669-0.77956-0.36499-0.04282
  -4   4  -421388.99 2743.95   1 0.71545-0.89002 0.68140-0.37904-0.15430-0.25333
   0   4   417067.68 5935.40   1 0.02044 0.15396 0.93609-0.63400-0.35115 0.75784
   0  -4  -337124.06 5428.44   1-0.80148 0.62661 0.47426-0.77713-0.36428 0.05841
  -4   0   332774.68 3816.19   1-0.66258 0.31263 0.63053-0.63053-0.40422 0.71040
  -4   4  -336028.11 3154.29   1 0.74697-0.92153 0.65103-0.34867-0.13487-0.17086
  -4   0   335597.29 3182.60   1-0.28836-0.06012 0.95726-0.95726 0.02223 0.28289
   0  -4  -2302761.5 8634.25   1-0.82281 0.64795 0.44363-0.74650-0.35519 0.15128
  -4   0   2298565.4 7780.29   1-0.48341 0.13346 0.76432-0.76432-0.42674 0.63086
  -4   4  -2287918.4 7931.37   1 0.76651-0.94108 0.63051-0.32815-0.12209-0.08173
  -4   0   2265702.7 7351.92   1-0.25025-0.09822 0.96775-0.96775-0.02851 0.23193
   0  -4  -123525.16 3199.93   1-0.85666 0.68180 0.38941-0.69228-0.33833 0.23638
  -4   4  -122418.78 2215.07   1 0.77196-0.94653 0.62453-0.32217-0.11841 0.01650
  -4   0   124394.07 2086.52   1-0.21189-0.13659 0.97416-0.97416-0.07814 0.17985
   0  -4   0 8836.44 2667.69   1-0.89564 0.72078 0.31518-0.61805-0.31379 0.31379
  -4   0   0 8819.21 3735.76   1-0.17501-0.17501 0.89001-0.89001-0.42100 0.42100
  -4   4   0 7206.66 1402.03   1 0.75825-0.93282 0.63935-0.33699-0.12756 0.12756
  -4   0   0 7871.43 2875.29   1-0.17424-0.17424 0.97666-0.97666-0.12554 0.12554
   0  -4   122744.96 2051.62   1-0.93280 0.75794 0.22461-0.52748-0.28180 0.38376
  -4   0  -119990.25 3100.88   1-0.07066-0.27937 0.90981-0.90981-0.40894 0.30688
  -4   4   124809.77 1958.26   1 0.71357-0.88814 0.68311-0.38075-0.15542 0.25733
  -4   0  -123883.27 1536.28   1-0.14027-0.20821 0.97588-0.97588-0.16724 0.06553
  -4   0  -2277503.7 7357.12   1-0.00211-0.34791 0.91714-0.91714-0.39855 0.19444
  -4   4   2282609.1 6554.27   1 0.60908-0.78383 0.76438-0.46171-0.21149 0.41524
   0   4  -2275759.3 7350.73   1 0.96240-0.78786-0.12153 0.42384 0.24292-0.44679
  -4   0  -332279.35 2982.21   1 0.03419-0.38423 0.91921-0.91921-0.39227 0.08609
  -4   4   334301.20 1637.07   1 0.36347-0.53822 0.87862-0.57595-0.30967 0.61529
   4  -4  -335816.56 1522.09   1 0.98284-0.80830 0.02658-0.32889 0.18253-0.48833
   0   4  -329433.59 2461.04   1 0.98020-0.80566-0.00964 0.31195 0.19777-0.50357
  -4   4   328575.22 5684.42   1 0.11897-0.29339 0.88283-0.58074-0.45435 0.75937
  -4   0  -421782.81 6040.52   1 0.04262-0.39266 0.91951-0.91951-0.39073-0.01749
   0   4  -420647.42 2432.06   1 0.98321-0.80867 0.10761 0.19469 0.14736-0.55510
  -4   4   418407.83 6334.22   1 0.01085-0.18527 0.94010-0.63801-0.34070 0.74740
  -4   0  -511072.66 3394.73   1 0.02681-0.37685 0.91889-0.91889-0.39359-0.11669
   0   4  -510595.37 2370.75   1 0.96938-0.79484 0.22745 0.07485 0.09249-0.60217
  -4   4   5 9373.08 5818.66   1-0.08666-0.08757 0.96906-0.66726-0.23110 0.73965
  -4   0  -686145.15 4351.60   1-0.01088-0.33914 0.91645-0.91645-0.39999-0.21235
   0   4  -688297.51 4407.68   1 0.93677-0.76220 0.34825-0.04589 0.03423-0.64570
  -4   4   684749.88 4939.62   1-0.17254-0.00169 0.97669-0.67489-0.12764 0.73790
   0   4  -7 4892.96 1719.45   1 0.88376-0.70919 0.46710-0.16474-0.02788-0.68549
  -4   4   7 4897.19 2511.15   1-0.24910 0.07486 0.96801-0.66621-0.03002 0.74199
  -5   4   8 7036.52 3995.29   1-0.31088 0.04951 0.94897-0.64717 0.05295 0.76073
  -1   5  -7 7154.17 1825.29   1 0.86525-0.73433 0.49925-0.12130-0.04552-0.66786
  -5   4   7 8482.88 5336.73   1-0.24669-0.01467 0.96852-0.66672-0.03318 0.74515
  -4  -1  -632488.60 4114.74   1-0.19346-0.20032 0.88540-0.96118-0.42264-0.18970
  -1   5  -635198.27 3567.69   1 0.91614-0.78521 0.40078-0.02283 0.00733-0.61880
  -5   4   633155.88 6758.51   1-0.17643-0.08492 0.97661-0.67482-0.12281 0.73307
  -4  -1  -527564.67 5587.98   1-0.16264-0.23114 0.89291-0.96870-0.41981-0.09047
  -1   5  -530584.54 3225.30   1 0.95163-0.82072 0.30198 0.07590 0.05657-0.56625
  -5   4   524974.20 6576.13   1-0.09919-0.16216 0.97125-0.66945-0.21637 0.72493
  -5   4   443703.14 1537.78   1-0.31444 0.05192 0.84645-0.54331-0.42968 0.83791
  -4  -1  -455007.35 4981.79   1-0.15373-0.24005 0.89491-0.97070-0.41891 0.01068
  -1   5  -450644.14 3459.62   1 0.97325-0.84235 0.20542 0.17246 0.10284-0.51058
  -5   4   449317.26 3568.66   1-0.01332-0.24829 0.94931-0.64722-0.31403 0.72072
  -4  -1  -340705.05 8112.72   1-0.16800-0.22578 0.89167-0.96746-0.42033 0.11416
  -5   4   331936.52 3004.19   1 0.14344-0.40597 0.91786-0.61472-0.37006 0.67623
  -1   5  -334883.20 2925.18   1 0.98299-0.85208 0.11237 0.26550 0.14524-0.45105
  -5   4   335504.88 5093.43   1 0.08019-0.34181 0.90644-0.60434-0.41465 0.71967
  -4  -1  -277255.35 6078.67   1-0.20712-0.18666 0.88176-0.95755-0.42377 0.21965
  -5   4   288510.74 3481.07   1 0.38651-0.64863 0.87143-0.56876-0.30200 0.50574
  -1   5  -285422.01 4124.92   1 0.98275-0.85185 0.02501 0.35287 0.18320-0.38707
  -5   4   287723.50 4866.06   1 0.18157-0.44319 0.83723-0.53514-0.51582 0.71916
  -4  -1  -187435.83 5100.99   1-0.27248-0.12121 0.86204-0.93781-0.42735 0.32529
  -5   4   195987.00 3895.21   1 0.51938-0.78150 0.81656-0.51389-0.25189 0.35376
  -1   5  -195058.87 4118.60   1 0.97488-0.84398-0.05406 0.43195 0.21604-0.31798
  -4  -1   0109009.1 7591.76   1-0.36321-0.03048 0.82657-0.90234-0.42993 0.42993
  -1   5   097533.14 3935.35   1 0.96235-0.83144-0.12175 0.49963 0.24301-0.24301
  -4  -1   193903.42 4617.46   1-0.47604 0.08234 0.76869-0.84446-0.42718 0.52924
  -5   4  -196316.67 4468.35   1 0.62435-0.88647 0.75403-0.45136-0.20398 0.10210
  -4  -1   282397.25 5244.49   1-0.60312 0.20942 0.68147-0.75723-0.41452 0.61865
  -5   4  -276526.45 3917.21   1 0.63339-0.89551 0.74768-0.44502-0.19944-0.00430
  -4  -1   332856.94 7451.88   1-0.73214 0.33870 0.55996-0.63568-0.38780 0.69367
  -5   4  -338372.31 3483.83   1 0.62443-0.88655 0.75397-0.45131-0.20394-0.10167
  -4  -1   453518.89 3115.44   1-0.84834 0.45490 0.40347-0.47919-0.34279 0.75061
  -5   4  -452254.58 3959.62   1 0.60102-0.86314 0.76966-0.46699-0.21538-0.19210
  -1   5   442978.76 8337.79   1 0.12201 0.00879 0.88084-0.50322-0.45741 0.86410
  -4  -1   527506.96 2347.38   1-0.93615 0.54271 0.21492-0.29064-0.27825 0.78802
  -5   4  -532034.36 3448.73   1 0.56483-0.82695 0.79186-0.48919-0.23218-0.27718
  -1   5   528319.24 4990.91   1-0.03458 0.16539 0.95633-0.57872-0.29020 0.79857
  -5   4  -631543.61 3011.56   1 0.51642-0.77854 0.81806-0.51539-0.25313-0.35810
  -5   4  -7 7888.75 1928.09   1 0.45544-0.71756 0.84597-0.54330-0.27730-0.43579
  -2   5  -7 1015.70 2209.95   1 0.80226-0.75862 0.58903-0.21108-0.09699-0.61638
  -5   3   7 1121.41 1664.18   1-0.29266-0.01226 0.95580-0.72945 0.02805 0.68391
  -3  -2  -6 5762.93 1729.28   1-0.35153 0.00158 0.83166-0.98319-0.42983-0.18253
  -2   5  -6 5594.56 1806.19   1 0.86079-0.81714 0.50654-0.12859-0.04956-0.56190
  -5   3   6 7956.39 3351.71   1-0.23166-0.07326 0.97136-0.74501-0.05274 0.66300
  -3  -2  -5 1762.65  811.72   1-0.31976-0.03019 0.84471-0.99624-0.42919-0.08110
  -2   5  -5  669.14 1266.12   1 0.90567-0.86203 0.42394-0.04599-0.00480-0.50475
  -5   3   5 1045.98 1283.50   1-0.16466-0.14025 0.97673-0.75038-0.13739 0.64594
  -5   3   4384456.2 5200.15   1-0.52732 0.22111 0.73663-0.50933-0.42343 0.83167
  -3  -2  -4410722.010221.36   1-0.31246-0.03748 0.84754-0.99908-0.42898 0.02074
  -2   5  -4413565.512055.36   1 0.93867-0.89503 0.34282 0.03512 0.03697-0.44461
  -5   3   4451978.313684.92   1-0.09045-0.21447 0.96976-0.74341-0.22666 0.63350
  -3  -2  -3 4012.10 1845.46   1-0.32999-0.01995 0.84063-0.99217-0.42945 0.12327
  -5   3   3 2231.27  914.88   1-0.14190-0.16437 0.89744-0.67009-0.41767 0.72384
  -2   5  -3 2372.50 1119.74   1 0.96143-0.91780 0.26466 0.11321 0.07474-0.38054
  -5   3   3 3758.47 2384.56   1-0.00698-0.29823 0.94702-0.72045-0.32106 0.62609
  -3  -2  -228981.69 6142.63   1-0.37261 0.02266 0.82236-0.97389-0.42997 0.22584
  -5   3   225253.39 4752.32   1 0.12748-0.43376 0.91877-0.69142-0.37362 0.57773
  -2   5  -223559.54 2269.53   1 0.97523-0.93159 0.19256 0.18532 0.10883-0.31270
  -5   3   223907.32 2420.84   1 0.08585-0.39107 0.90321-0.67664-0.42052 0.62387
  -3  -2  -1 1657.45  774.19   1-0.43937 0.08942 0.78931-0.94085-0.42886 0.32680
  -5   3   1 1464.95  877.85   1 0.30063-0.60643 0.89510-0.66810-0.32926 0.43113
  -2   5  -1 1916.72  876.16   1 0.98202-0.93838 0.12899 0.24889 0.13782-0.23976
   3   2   1 1340.86  437.78   1-0.15902 0.50750 0.97666-0.82576-0.14434 0.24605
  -3  -2   0704768.917174.93   1-0.52688 0.17693 0.73692-0.88846-0.42347 0.42347
  -3  -2   1 2056.99 1082.49   1-0.62847 0.27852 0.66067-0.81220-0.41053 0.51259
  -5   3  -1 1601.72  899.85   1 0.46294-0.76874 0.84282-0.61582-0.27446 0.17258
  -2   5   1 1941.71  823.03   1 0.98358-0.93994 0.04445 0.33343 0.17490-0.07297
  -3  -2   231819.35 6443.40   1-0.73429 0.38456 0.55758-0.70901-0.38719 0.59110
  -5   3  -220815.50 2233.84   1 0.48845-0.79426 0.83153-0.60452-0.26451 0.06076
  -2   5   225657.56 1996.08   1 0.98330-0.93967 0.03677 0.34110 0.17819 0.02567
  -3  -2   3 3197.87 1720.23   1-0.83314 0.48341 0.42789-0.57933-0.35039 0.65626
  -5   3  -3 2419.26  982.52   1 0.49033-0.79614 0.83066-0.60366-0.26376-0.04185
  -2   5   3 1747.95  538.22   1 0.98399-0.94035 0.06839 0.30949 0.16457 0.14123
  -3  -2   4376284.2 7524.24   1-0.91371 0.56399 0.27443-0.42587-0.29967 0.70749
  -5   3  -4374633.2 8190.13   1 0.47371-0.77952 0.83816-0.61116-0.27030-0.13718
  -2   5   4377218.5 7688.39   1 0.11706-0.07346 0.88408-0.50646-0.45242 0.85912
  -5   3  -5  190.34 1382.87   1 0.44143-0.74724 0.85164-0.62464-0.28254-0.22681
   3   2  -5  -75.91  892.77   1 0.96663-0.61756-0.10164 0.25279 0.23511-0.74478
  -2   5   5  708.74 1097.03   1-0.01823 0.06184 0.95103-0.57341-0.30855 0.81692
  -5   3  -6 5429.90 1513.88   1 0.39479-0.70060 0.86869-0.64169-0.29917-0.31206
   3   2  -6 3789.20 1103.16   1 0.98390-0.63483 0.08333 0.06781 0.15805-0.76966
  -2   5   6 5480.17 2947.45   1-0.13797 0.18153 0.97573-0.59848-0.17003 0.78029
  -5   3  -7   86.45  739.52   1 0.33393-0.63974 0.88692-0.65992-0.31912-0.39398
  -2   5   7  926.94  975.81   1-0.23997 0.28353 0.96987-0.59262-0.04195 0.75392
  -3   5  -7  675.66 1151.27   1 0.72702-0.77067 0.67061-0.29266-0.14733-0.56605
  -3   5  -6 6164.22 2113.75   1 0.78911-0.83275 0.60493-0.22698-0.10650-0.50496
  -5   2   6 5024.05 2377.99   1-0.28819-0.06029 0.95732-0.80642 0.02200 0.58825
  -2  -3  -5  883.58  791.47   1-0.50983 0.20362 0.74801-0.97531-0.42490-0.08539
  -3   5  -5 1917.46 2014.77   1 0.83903-0.88267 0.53977-0.16182-0.06831-0.44124
  -5   2   5  671.63  865.95   1-0.23261-0.11587 0.97120-0.82030-0.05151 0.56006
  -5   2   4373866.0 5964.96   1-0.64081 0.29086 0.65006-0.49852-0.40837 0.81661
  -2  -3  -4393958.6 8713.47   1-0.50145 0.19524 0.75330-0.98060-0.42553 0.01729
  -3   5  -4388744.1 8201.02   1 0.87832-0.92196 0.47691-0.09896-0.03322-0.37441
  -5   2   4388243.7 8766.94   1-0.17170-0.17677 0.97670-0.82580-0.12868 0.53552
  -2  -3  -3 3594.12 1566.65   1-0.51778 0.21157 0.74290-0.97020-0.42426 0.11807
  -5   2   3 2310.66 1142.33   1-0.35917 0.00922 0.82835-0.67682-0.42990 0.73608
  -3   5  -3 1809.49  976.16   1 0.90822-0.95186 0.41847-0.04052-0.00191-0.30381
  -5   2   3 1910.67 1363.19   1-0.10404-0.24443 0.97200-0.82111-0.21064 0.51578
   2   3   3 1929.08  674.06   1-0.04547 0.35069 0.95954-0.73297-0.27786 0.58289
  -2  -3  -226067.20 5871.38   1-0.55691 0.25070 0.71627-0.94357-0.42046 0.21634
  -5   2   220800.30 4415.91   1-0.11881-0.23121 0.90199-0.75042-0.41507 0.61919
  -3   5  -229261.31 8052.18   1 0.92984-0.97348 0.36712 0.01082 0.02466-0.22848
  -5   2   226345.86 7053.72   1-0.02726-0.32156 0.95403-0.80298-0.29845 0.50180
  -2  -3  -1 3158.89 1391.24   1-0.61542 0.30921 0.67153-0.89884-0.41265 0.31059
  -5   2   1 2638.65 1510.69   1 0.06282-0.41286 0.91996-0.76839-0.38693 0.48898
  -3   5  -1 1589.28  825.23   1 0.94413-0.98778 0.32643 0.05151 0.04517-0.14708
  -5   2   1 5533.45 2305.07   1 0.06039-0.40921 0.91715-0.76611-0.39391 0.49559
  -2  -3   0659453.114634.73   1-0.68774 0.38153 0.60658-0.83388-0.39882 0.39882
  -5   2   0702585.815213.19   1 0.18793-0.53797 0.91399-0.76242-0.35957 0.35957
  -5   2   0595083.513320.52   1 0.16202-0.51085 0.85249-0.70145-0.49698 0.49698
  -2  -3   1 2478.97 1396.34   1-0.76617 0.46016 0.52023-0.74738-0.37727 0.47922
  -5   2  -1 1091.29  952.31   1 0.26706-0.61655 0.90210-0.75077-0.33894 0.23706
  -3   5   1 1125.95  549.29   1 0.95231-0.99595 0.29959 0.07828 0.05774 0.04418
  -2  -3   225014.84 6845.86   1-0.84241 0.53640 0.41318-0.64034-0.34584 0.54975
  -5   2  -223697.19 2646.05   1 0.31005-0.65954 0.89291-0.74158-0.32644 0.12270
  -3   5   227807.49 1834.94   1 0.94215-0.98579 0.33252 0.04542 0.04213 0.16168
  -2  -3   3 2928.65 1765.98   1-0.90803 0.60202 0.28781-0.51496-0.30435 0.61022
  -3   5   3 2087.58  814.73   1-0.75226 0.70855 0.53696-0.15837-0.38179 0.68765
  -5   2  -3 2298.71 1378.88   1 0.32529-0.67478 0.88916-0.73783-0.32180 0.01618
  -3   5   3 2704.47  808.44   1 0.90592-0.94956 0.42342-0.04547-0.00452 0.31026
  -5   2  -4363757.3 7853.34   1 0.31838-0.66787 0.89090-0.73956-0.32392-0.08356
  -3   5   4359414.5 3585.13   1 0.76438-0.80802 0.63281-0.25486-0.12351 0.53116
   2   3  -4362717.9 7347.86   1 0.95617-0.65073-0.14744 0.37417 0.25297-0.66071
  -3   5   4356508.9 7596.90   1 0.10238-0.14598 0.89336-0.51574-0.43751 0.84421
  -5   2  -5 1011.79 1041.83   1 0.29285-0.64235 0.89683-0.74549-0.33154-0.17781
   2   3  -5  850.89  744.36   1 0.98128-0.67584 0.00285 0.22387 0.19254-0.70222
  -3   5   5  732.77 1099.46   1-0.01609-0.02751 0.95028-0.57267-0.31095 0.81932
  -5   2  -6 4122.44 1608.10   1 0.25063-0.60012 0.90509-0.75376-0.34348-0.26774
   2   3  -6 4918.12 1470.39   1 0.97938-0.67394 0.15937 0.06735 0.12409-0.73570
  -3   5   6 6961.31 2645.18   1-0.12316 0.07960 0.97443-0.59719-0.18787 0.79813
  -5   2  -7 1062.64  839.66   1 0.19106-0.54109 0.91364-0.76207-0.35880-0.35559
  -3   5   7 1038.78  798.53   1-0.21681 0.17325 0.97356-0.59631-0.07185 0.78382
  -4   5  -7 9523.13 2413.33   1 0.64336-0.77442 0.74048-0.36214-0.19434-0.51876
  -4   5  -635581.62 3863.31   1 0.70496-0.83588 0.69084-0.31289-0.16048-0.45098
  -1  -4  -526541.32 6041.51   1-0.71098 0.44852 0.58300-0.88606-0.39320-0.11709
  -4   5  -528806.96 3260.16   1 0.75541-0.88633 0.64233-0.26438-0.12942-0.38013
  -5   1   529356.57 9065.40   1-0.30012-0.09191 0.95313-0.87768 0.03821 0.47034
  -5   1   446767.08 4572.62   1-0.71131 0.31761 0.58265-0.50688-0.39312 0.80136
  -1  -4  -446731.39 8892.66   1-0.69672 0.43425 0.59764-0.90071-0.39672-0.01151
  -4   5  -455775.30 3712.20   1 0.79558-0.92651 0.59721-0.21926-0.10187-0.30577
  -5   1   453382.51 6605.44   1-0.25347-0.13857 0.96703-0.89158-0.02428 0.43112
   1   4   449335.55 2080.77   1-0.03709 0.29871 0.95709-0.65500-0.28737 0.69407
  -1  -4  -333586.34 2487.98   1-0.70484 0.44238 0.58937-0.89244-0.39475 0.08857
  -5   1   333018.56 5470.34   1-0.50968 0.11598 0.74810-0.67234-0.42491 0.73109
  -4   5  -336622.66 3169.06   1 0.82620-0.95712 0.55784-0.17989-0.07870-0.22702
  -5   1   334407.08 2765.89   1-0.20350-0.18853 0.97503-0.89958-0.08881 0.39394
  -1  -4  -276735.53 6573.86   1-0.73128 0.46899 0.56092-0.86379-0.38805 0.18414
  -5   1   279406.69 3603.94   1-0.31674-0.07695 0.84589-0.77012-0.42911 0.63323
  -4   5  -278748.45 4200.25   1 0.84752-0.97845 0.52721-0.14926-0.06117-0.14264
  -5   1   283431.39 4553.95   1-0.14925-0.24278 0.97636-0.90091-0.15630 0.35972
  -1  -4  -195098.49 5692.11   1-0.77213 0.50984 0.51283-0.81570-0.37523 0.27328
  -5   1   185592.91 3734.70   1-0.15375-0.24003 0.89491-0.81912-0.41891 0.52097
  -4   5  -186161.32 3831.09   1 0.85911-0.99004 0.50922-0.13127-0.05106-0.05084
  -5   1   194777.71 5805.53   1-0.08910-0.30293 0.96951-0.89406-0.22824 0.32995
  -1  -4   0104817.3 5528.99   1-0.82114 0.55885 0.44612-0.74899-0.35594 0.35594
  -5   1   0111201.1 5174.47   1-0.02811-0.36567 0.91488-0.83910-0.40272 0.40272
  -5   1   0102900.3 3563.90   1-0.02032-0.37211 0.95173-0.87621-0.30623 0.30623
  -1  -4   186330.95 8566.41   1-0.87197 0.60968 0.36206-0.66493-0.32948 0.43143
  -5   1  -196119.85 5287.51   1 0.06004-0.45383 0.91992-0.84414-0.38746 0.28540
  -4   5   183558.50 3291.69   1 0.84238-0.97331 0.53487-0.15692-0.06551 0.16743
  -5   1  -189041.86 4514.46   1 0.06223-0.45466 0.91620-0.84067-0.39585 0.29418
  -1  -4   278245.95 4099.13   1-0.91847 0.65618 0.26278-0.56565-0.29554 0.49945
  -5   1  -279569.57 4560.89   1 0.11491-0.50870 0.91932-0.84354-0.37634 0.17222
  -4   5   281435.49 3152.94   1 0.79564-0.92656 0.59714-0.21919-0.10182 0.30565
  -5   1  -284518.00 3190.57   1 0.16729-0.55972 0.84847-0.77295-0.50209 0.29874
  -4   5   333324.04 2329.82   1-0.92298 0.79183 0.25130 0.12728-0.29145 0.59731
  -5   1  -334936.92 2795.02   1 0.14151-0.53530 0.91798-0.84220-0.37049 0.06432
  -4   5   333963.16 1593.28   1 0.67991-0.81084 0.71217-0.33422-0.17471 0.48044
   1   4  -331355.52 2485.24   1 0.95528-0.69347-0.15087 0.45318 0.25428-0.56009
  -5   1  -449489.77 4472.91   1 0.14428-0.53807 0.91780-0.84202-0.36987-0.03835
  -4   5   441334.43 1116.07   1 0.31992-0.45097 0.89052-0.51218-0.32345 0.73094
   1   4  -451539.67 3342.89   1 0.97809-0.71628-0.02964 0.33195 0.20605-0.61379
  -4   5   446053.81 5645.17   1 0.08098-0.21179 0.90599-0.52837-0.41547 0.82216
  -5   1  -528619.82 4929.66   1 0.12645-0.52024 0.91882-0.84304-0.37384-0.13644
   1   4  -528523.66 3151.25   1 0.98357-0.72176 0.09798 0.20431 0.15161-0.66129
  -4   5   523963.48 5037.68   1-0.02359-0.10721 0.95283-0.57521-0.30257 0.81094
  -5   1  -633911.15 4976.36   1 0.09005-0.48384 0.91995-0.84417-0.38153-0.23081
   1   4  -630507.35 2669.27   1 0.96902-0.70721 0.22934 0.07296 0.09160-0.70321
  -4   5   630751.03 8464.66   1-0.11968-0.01099 0.97406-0.59681-0.19204 0.80230
  -5   1  -7 6801.16 2194.08   1 0.03581-0.42960 0.91927-0.84349-0.39197-0.32242
  -4   5   7 7316.12 4033.93   1-0.20547 0.07478 0.97484-0.59760-0.08632 0.79829
  -4   5   8 6680.85 3778.05   1-0.28278 0.15210 0.95906-0.58182 0.01471 0.79896
  -5   5  -741583.75 3889.78   1 0.55434-0.77277 0.79787-0.41953-0.23686-0.47624
  -5   5  -688360.26 5395.20   1 0.61324-0.83167 0.76161-0.38327-0.20947-0.40176
  -5   0   565209.46 5938.51   1-0.88799 0.45084 0.33104-0.33104-0.31917 0.82894
   0  -5  -572867.90 2719.22   1-0.87848 0.65990 0.34979-0.72838-0.32543-0.18433
  -5   5  -574418.20 4771.70   1 0.66083-0.87926 0.72733-0.34899-0.18517-0.32418
   0  -5  -4  743.41  954.68   1-0.85807 0.63949 0.38698-0.76557-0.33755-0.07026
  -5   0   4  923.74 1038.23   1-0.76204 0.32488 0.52527-0.52527-0.37864 0.78646
  -5   5  -4 1101.41 1305.00   1 0.69780-0.91601 0.69711-0.31916-0.16463-0.24301
   0   5   4  171.71  418.27   1 0.11157 0.10644 0.88761-0.50999-0.44686 0.85356
   0  -5  -3154777.6 4796.67   1-0.85527 0.63669 0.39180-0.77039-0.33909 0.03323
  -5   0   3149821.0 4839.29   1-0.61478 0.17734 0.67206-0.67206-0.41276 0.71894
  -5   5  -3165982.3 6546.14   1 0.72425-0.94246 0.67323-0.29528-0.14901-0.15671
   0  -5  -2263099.4 6598.48   1-0.86645 0.64787 0.37217-0.75076-0.33278 0.12887
  -5   0   2279578.7 6930.15   1-0.46593 0.02849 0.77457-0.77457-0.42772 0.63184
  -5   5  -2291036.4 7362.93   1 0.73946-0.95767 0.65855-0.28060-0.13963-0.06419
   0  -5  -1171020.510401.32   1-0.88738 0.66880 0.33227-0.71086-0.31958 0.21763
  -5   0   1172527.1 5858.37   1-0.33082-0.10661 0.84030-0.84030-0.42947 0.53153
  -5   5  -1194957.2 6802.41   1 0.74151-0.95972 0.65651-0.27856-0.13833 0.03642
  -5   0   1165316.9 6121.49   1-0.23959-0.19601 0.96994-0.96994-0.04245 0.14416
   0  -5   0 1664.13 1081.66   1-0.91348 0.69490 0.27500-0.65359-0.29987 0.29987
  -5   0   0 2769.53 1256.82   1-0.21877-0.21877 0.87851-0.87851-0.42466 0.42466
  -5   5   0 1941.70 1235.07   1 0.72630-0.94451 0.67129-0.29335-0.14777 0.14777
  -5   0   0 2131.08 1029.35   1-0.21780-0.21780 0.97343-0.97343-0.07059 0.07059
   0  -5   1171783.8 5951.59   1-0.94012 0.72155 0.20292-0.58150-0.27382 0.37578
  -5   0  -1168443.5 7343.16   1-0.13346-0.30407 0.89916-0.89916-0.41675 0.31469
  -5   5   1170699.1 5262.66   1 0.68534-0.90355 0.70768-0.32973-0.17168 0.27360
  -5   0  -1155327.5 4437.71   1-0.21123-0.22437 0.97423-0.97423-0.07898-0.02272
  -5   0  -3160543.2 6403.92   1-0.04255-0.39499 0.91336-0.91336-0.40491 0.09874
  -5   5   3143179.0 3406.29   1 0.43081-0.64924 0.85577-0.47744-0.28643 0.59205
   0   5  -3147242.3 5343.14   1 0.97869-0.76051-0.02438 0.40227 0.20388-0.50969
  -5   5   3152828.2 5483.74   1 0.15377-0.37179 0.85865-0.48104-0.48893 0.79395
  -5   0  -4  429.73 1224.95   1-0.03279-0.40474 0.91441-0.91441-0.40344-0.00478
   0   5  -4  461.08 1398.36   1 0.98397-0.76580 0.07723 0.30065 0.16072-0.56846
  -5   5   4 1021.98  967.84   1 0.05468-0.27270 0.92008-0.54246-0.38788 0.79458
  -5   0  -579687.89 4810.24   1-0.04386-0.39367 0.91321-0.91321-0.40511-0.10517
   0   5  -574251.45 4484.16   1 0.97643-0.75825 0.18401 0.19386 0.11278-0.62246
  -5   5   568458.66 5278.21   1-0.03890-0.17889 0.95742-0.58017-0.28604 0.79459
  -5   0  -680386.74 4665.74   1-0.07425-0.36328 0.90931-0.90931-0.40943-0.20291
   0   5  -680133.14 4650.36   1 0.95387-0.73570 0.29403 0.08385 0.06047-0.67208
  -5   5   680119.13 5096.77   1-0.12449-0.09331 0.97457-0.59733-0.18628 0.79654
   0   5  -734599.53 3719.81   1 0.91378-0.69557 0.40618-0.02823 0.00451-0.71790
  -5   5   729081.67 9271.35   1-0.20296-0.01483 0.97508-0.59784-0.08950 0.80147
  -1   6  -7 1524.76 1440.00   1 0.89333-0.71876 0.44903 0.00450-0.01814-0.69523
  -6   5   7 1648.93 1729.25   1-0.20730-0.09762 0.97466-0.59741-0.08399 0.79596
  -5  -1  -650445.43 8532.54   1-0.23233-0.24896 0.87455-0.95034-0.42563-0.18671
  -1   6  -646775.56 5367.25   1 0.93447-0.75991 0.35467 0.09886 0.03099-0.64246
  -5  -1  -5 7432.81 3070.13   1-0.20672-0.27457 0.88187-0.95766-0.42374-0.08654
  -1   6  -5 7844.46 2267.03   1 0.96208-0.78754 0.26193 0.19152 0.07606-0.58573
  -6   5   5 7764.14 3260.47   1-0.05851-0.24640 0.96282-0.58558-0.26370 0.77225
  -5  -1  -4 9828.73 3884.71   1-0.19994-0.28135 0.88370-0.95948-0.42319 0.01496
  -1   6  -4 8661.32 2219.68   1 0.97782-0.80328 0.17317 0.28028 0.11777-0.52551
  -6   5   410197.20 3067.87   1 0.02467-0.32990 0.93425-0.55664-0.35574 0.76244
  -5  -1  -318132.70 3978.11   1-0.21273-0.26855 0.88021-0.95600-0.42421 0.11803
  -6   5   320230.37 2380.51   1 0.23588-0.54168 0.90753-0.52920-0.34746 0.65308
  -1   6  -318857.25 2714.50   1 0.98379-0.80925 0.08953 0.36393 0.15534-0.46114
  -6   5   319426.39 6486.17   1 0.11206-0.41728 0.88730-0.50968-0.44736 0.75239
  -5  -1  -2178252.5 6915.88   1-0.24605-0.23524 0.87036-0.94614-0.42652 0.22241
  -6   5   2195894.8 5060.71   1 0.41630-0.72210 0.86117-0.48284-0.29165 0.49540
  -1   6  -2190723.2 6088.67   1 0.98201-0.80748 0.01284 0.44061 0.18834-0.39221
  -5  -1  -127154.18 3343.30   1-0.30063-0.18054 0.85201-0.92778-0.42857 0.32651
  -6   5   119662.98 1998.22   1 0.52142-0.82722 0.81553-0.43719-0.25104 0.35291
  -1   6  -122478.21 2665.22   1 0.97478-0.80024-0.05478 0.50824 0.21633-0.31827
  -5  -1   0 8874.17 3434.42   1-0.37581-0.10536 0.82090-0.89667-0.42997 0.42997
  -6   5   0 9634.36 2066.95   1 0.58090-0.88671 0.78229-0.40396-0.22484 0.22484
  -1   6   0 7572.45 1402.71   1 0.96470-0.79016-0.11099 0.56445 0.23879-0.23879
  -5  -1   125662.40 7056.22   1-0.46968-0.01150 0.77240-0.84817-0.42752 0.52959
  -6   5  -122496.28 2669.62   1 0.61067-0.91647 0.76333-0.38499-0.21072 0.10885
  -1   6   122558.20 2361.93   1 0.95472-0.78018-0.15304 0.60650 0.25511-0.15318
  -5  -1   2202167.9 6247.56   1-0.57758 0.09639 0.70118-0.77695-0.41801 0.62213
  -6   5  -2190829.5 6179.85   1 0.61959-0.92540 0.75731-0.37897-0.20634 0.00260
  -6   5  -320022.64 3008.14   1 0.61268-0.91848 0.76198-0.38365-0.20974-0.09587
  -5  -1   411628.64 4500.51   1-0.80242 0.32155 0.47296-0.54867-0.36390 0.77172
  -6   5  -4 8025.32 2263.54   1 0.59267-0.89847 0.77499-0.39666-0.21935-0.18813
  -1   6   4 9347.85 1666.78   1 0.95465-0.78011-0.15329 0.60675 0.25521 0.15252
  -5  -1   5 6642.22 2968.98   1-0.89718 0.41631 0.31190-0.38762-0.31267 0.82245
  -6   5  -5 8020.62 2551.84   1 0.56095-0.86675 0.79411-0.41577-0.23392-0.27543
  -1   6   5 7125.71 2370.23   1 0.02416 0.15024 0.93448-0.48134-0.35518 0.86355
  -6   5  -653339.38 3926.01   1 0.51798-0.82378 0.81727-0.43894-0.25248-0.35875
  -6   5  -7 3177.04 1895.76   1 0.46352-0.76933 0.84257-0.46424-0.27423-0.43887
  -2   6  -7 1232.87 1536.29   1 0.84385-0.75657 0.53269-0.07916-0.06428-0.64909
  -6   4   7 1569.57 1188.83   1-0.25086-0.09762 0.96762-0.66582-0.02771 0.73969
  -4  -2  -611576.70 4820.44   1-0.35878-0.07865 0.82852-0.98006-0.42990-0.18245
  -2   6  -616038.86 2790.15   1 0.89271-0.80542 0.45023 0.00330-0.01878-0.59268
  -6   4   617299.66 9001.75   1-0.18662-0.16186 0.97624-0.67444-0.11010 0.72036
  -4  -2  -5 1301.21 1182.91   1-0.33242-0.10501 0.83964-0.99118-0.42950-0.08079
  -2   6  -5 1071.33 1256.84   1 0.92906-0.84178 0.36916 0.08437 0.02362-0.53318
  -6   4   5 2065.62 1527.20   1-0.11722-0.23125 0.97377-0.67197-0.19498 0.70353
  -4  -2  -459093.55 4325.06   1-0.32644-0.11099 0.84206-0.99359-0.42937 0.02113
  -6   4   443313.67 3100.69   1-0.30977-0.04017 0.84858-0.54551-0.42889 0.83713
  -2   6  -464474.09 4971.37   1 0.95482-0.86755 0.29058 0.16287 0.06216-0.46990
  -6   4   462793.96 4956.81   1-0.04212-0.30635 0.95837-0.65657-0.28240 0.68924
  -4  -2  -3 1876.53 1736.96   1-0.34101-0.09642 0.83611-0.98764-0.42967 0.12349
  -6   4   3 1509.21 1107.21   1 0.00744-0.35747 0.91780-0.61466-0.39695 0.70313
  -2   6  -3 1885.27 2220.47   1 0.97129-0.88402 0.21701 0.23644 0.09741-0.40322
  -6   4   3 1374.58  932.61   1 0.03955-0.38838 0.92748-0.62538-0.37176 0.67679
  -4  -2  -239606.31 5119.04   1-0.37625-0.06118 0.82070-0.97223-0.42997 0.22585
  -6   4   240010.86 5734.83   1 0.21722-0.56725 0.91036-0.60722-0.35220 0.55632
  -2   6  -240472.37 2845.80   1 0.98031-0.89305 0.15000 0.30346 0.12835-0.33222
  -6   4   242609.66 6096.78   1 0.12649-0.47531 0.87786-0.57576-0.46190 0.66525
  -4  -2  -1 9188.23 4363.29   1-0.43161-0.00582 0.79345-0.94498-0.42911 0.32705
  -6   4   1 7570.13 1620.34   1 0.35183-0.70132 0.88202-0.57935-0.31345 0.41532
  -2   6  -1 8197.77 2039.77   1 0.98373-0.89647 0.09194 0.36151 0.15428-0.25621
   4   2   1 3844.26 1018.31   1 0.00913 0.42690 0.94080-0.78976-0.33881 0.44049
  -4  -2   0125272.6 5304.59   1-0.50512 0.06768 0.75100-0.90253-0.42526 0.42526
  -6   4   0117990.1 4821.88   1 0.43419-0.78368 0.85447-0.55180-0.28520 0.28520
  -2   6   0117171.1 4774.63   1 0.98362-0.89635 0.04583 0.40763 0.17431-0.17431
  -4  -2   1 9391.11 4802.09   1-0.59280 0.15536 0.68957-0.84111-0.41600 0.51806
  -6   4  -1 6879.92 1857.64   1 0.48058-0.83007 0.83511-0.53244-0.26762 0.16575
  -2   6   1 7443.12 1426.36   1 0.98219-0.89492 0.01547 0.43799 0.18724-0.08530
  -4  -2   242106.48 6428.89   1-0.68848 0.25104 0.60585-0.75738-0.39865 0.60277
  -6   4  -239433.30 3581.64   1 0.50105-0.85054 0.82560-0.52294-0.25944 0.05570
  -2   6   241405.91 2582.94   1 0.98153-0.89426 0.00610 0.44735 0.19118 0.01268
  -4  -2   3 2144.66 1345.74   1-0.78388 0.34672 0.49784-0.64928-0.37104 0.67691
  -6   4  -3 2441.84 2259.90   1 0.50184-0.85133 0.82523-0.52256-0.25912-0.04648
  -2   6   3 1339.72  896.14   1 0.98279-0.89552 0.02577 0.42768 0.18287 0.12292
  -4  -2   452552.30 5383.87   1-0.87009 0.43294 0.36554-0.51697-0.33062 0.73844
  -6   4  -456998.89 3963.06   1 0.48669-0.83618 0.83234-0.52967-0.26521-0.14227
  -2   6   456247.33 2574.89   1 0.98379-0.89652 0.08936 0.36409 0.15541 0.25232
  -2   6   463450.4110341.76   1 0.17594-0.08874 0.84172-0.38858-0.51043 0.91712
  -4  -2   5 2146.58 1272.85   1-0.93760 0.50045 0.21059-0.36202-0.27666 0.78643
  -6   4  -5 2492.17 2020.64   1 0.45772-0.80721 0.84502-0.54235-0.27644-0.23291
  -2   6   5 1656.61 1062.70   1 0.03812 0.04907 0.92815-0.47501-0.37023 0.87860
  -6   4  -612685.20 2306.06   1 0.41592-0.76542 0.86131-0.55864-0.29178-0.31944
  -2   6   613907.32 6193.76   1-0.08998 0.17710 0.96967-0.51698-0.22720 0.83747
  -6   4  -7  623.90  951.71   1 0.36139-0.71088 0.87924-0.57657-0.31036-0.40274
  -3   6  -7  548.74 1592.31   1 0.78235-0.78235 0.61280-0.15926-0.11126-0.60211
  -6   3   7 1277.10  862.92   1-0.29646-0.09558 0.95446-0.72811 0.03321 0.67875
  -3  -3  -6  645.28  988.81   1-0.50970 0.11600 0.74809-0.97540-0.42491-0.18744
  -3   6  -6 1444.07 1822.62   1 0.83625-0.83625 0.54377-0.09023-0.07060-0.54086
  -6   3   6 1300.80 1404.94   1-0.24056-0.15148 0.96975-0.74341-0.04118 0.65145
  -3  -3  -5  680.39  772.12   1-0.48176 0.08807 0.76531-0.99261-0.42684-0.08345
  -3   6  -5 1001.21 1376.45   1 0.87875-0.87875 0.47615-0.02261-0.03281-0.47674
  -6   3   5 1763.97 1785.58   1-0.18037-0.21167 0.97650-0.75015-0.11791 0.62646
  -3  -3  -4182391.2 7321.19   1-0.47520 0.08151 0.76919-0.99649-0.42722 0.01898
  -6   3   4164251.3 5354.16   1-0.47220 0.07851 0.77094-0.54364-0.42739 0.83563
  -3   6  -4192445.0 7991.50   1 0.91139-0.91139 0.41152 0.04201 0.00172-0.40937
  -6   3   4187355.3 8089.66   1-0.11521-0.27682 0.97353-0.74718-0.19737 0.60421
  -3  -3  -3  547.19 1159.77   1-0.48919 0.09550 0.76084-0.98814-0.42637 0.12019
  -6   3   3  -72.17  588.53   1-0.20050-0.19328 0.88355-0.65619-0.42323 0.72941
  -3   6  -3  374.62 1587.03   1 0.93554-0.93554 0.35171 0.10181 0.03248-0.33822
  -6   3   3  533.51 1038.42   1-0.04430-0.34774 0.95899-0.73264-0.27993 0.58506
  -3  -3  -2 1760.17 1001.56   1-0.52269 0.12899 0.73969-0.96699-0.42384 0.21972
  -6   3   2 1297.80 1101.89   1 0.00889-0.40268 0.91790-0.69054-0.39670 0.60082
  -3   6  -2 1691.62 1381.10   1 0.95256-0.95256 0.29871 0.15474 0.05818-0.26205
   3   3   2  591.46  271.21   1-0.20150 0.59354 0.97521-0.74887-0.09135 0.29477
  -6   3   2 1503.36  733.80   1 0.03351-0.42594 0.93029-0.70372-0.36528 0.56863
  -3  -3  -1  531.71  747.52   1-0.57370 0.18000 0.70407-0.93137-0.41850 0.31644
  -6   3   1  827.15  982.01   1 0.15853-0.55232 0.91677-0.68941-0.36660 0.46866
  -3   6  -1 -157.28 1052.11   1 0.96346-0.96346 0.25593 0.19752 0.07894-0.18087
   3   3   1  204.18  224.78   1-0.28301 0.67506 0.95899-0.73264 0.01502 0.08668
  -6   3   1  601.31 1222.85   1 0.11789-0.51032 0.88354-0.65697-0.45325 0.55493
  -3  -3   0396633.510453.81   1-0.63879 0.24509 0.65182-0.87912-0.40874 0.40874
  -6   3   0410094.610599.03   1 0.25952-0.65270 0.90351-0.67651-0.34104 0.34104
  -3   6   0393130.2 9918.33   1 0.96952-0.96952 0.22673 0.22673 0.09284-0.09284
  -3  -3   1  262.67 1084.81   1-0.71275 0.31931 0.58091-0.80807-0.39307 0.49503
  -6   3  -1  507.82 1254.42   1 0.32213-0.71531 0.88996-0.66296-0.32277 0.22090
  -3   6   1  747.27 1243.17   1 0.97143-0.97143 0.21620 0.23725 0.09780 0.00413
  -3  -3   2  295.62 1093.88   1-0.78951 0.39607 0.49045-0.71760-0.36895 0.57285
  -6   3  -2 1523.76 1729.06   1 0.35552-0.74870 0.88096-0.65395-0.31226 0.10851
  -3   6   2  572.03  604.33   1 0.96852-0.96852 0.23192 0.22153 0.09038 0.11348
  -3  -3   3  627.45  933.25   1-0.86173 0.46829 0.38058-0.60773-0.33550 0.64136
  -6   3  -3 1529.16 1856.03   1 0.36600-0.75918 0.87786-0.65086-0.30884 0.00323
  -3   6   3  -71.77  469.66   1 0.95589-0.95589 0.28661 0.16684 0.06410 0.24170
  -3  -3   4156815.2 6570.05   1-0.92236 0.52892 0.25290-0.48005-0.29202 0.69984
  -6   3  -4170465.3 6957.45   1 0.35781-0.75099 0.88029-0.65329-0.31152-0.09596
  -3   6   4167397.8 4799.17   1 0.91401-0.91401 0.40566 0.04787 0.00479 0.40285
  -3   6   4168082.5 6616.57   1 0.16041-0.16041 0.85371-0.40057-0.49541 0.90211
  -6   3  -5 1012.01 1900.38   1 0.33361-0.72679 0.88701-0.66001-0.31922-0.19013
   3   3  -5  256.37 1385.08   1 0.96500-0.57229-0.10957 0.33630 0.23823-0.74791
  -3   6   5  707.70 1061.56   1 0.03875-0.03875 0.92785-0.47471-0.37091 0.87928
  -6   3  -6  896.84 1376.10   1 0.29483-0.68801 0.89639-0.66939-0.33097-0.28026
   3   3  -6  729.60  957.58   1 0.98361-0.59090 0.04541 0.18131 0.17449-0.78610
  -3   6   6 1242.97 1412.55   1-0.07547 0.07547 0.96679-0.51410-0.24413 0.85440
  -6   3  -7 -210.95  848.19   1 0.24189-0.63506 0.90657-0.67956-0.34585-0.36725
  -3   6   7  117.60  664.56   1-0.17786 0.17786 0.97658-0.52388-0.12103 0.83301
  -4   6  -7  980.91 1697.75   1 0.71064-0.79792 0.68577-0.23223-0.15716-0.55621
  -4   6  -611785.62 2644.57   1 0.76662-0.85390 0.63039-0.17685-0.12201-0.48945
  -6   2   614678.47 6915.26   1-0.29566-0.13994 0.95475-0.80385 0.03213 0.57813
  -2  -4  -5 1895.23 1033.57   1-0.64411 0.29416 0.64717-0.95024-0.40777-0.10252
  -4   6  -5 1962.18 1355.34   1 0.81192-0.89921 0.57681-0.12327-0.08977-0.41978
  -6   2   5 3266.62 1860.70   1-0.24560-0.18999 0.96875-0.81785-0.03460 0.54315
  -2  -4  -453991.46 5006.10   1-0.63438 0.28443 0.65562-0.95869-0.40951 0.00127
  -6   2   452960.64 4084.92   1-0.58351 0.14607 0.69671-0.54517-0.41725 0.82549
  -4   6  -458139.86 4021.06   1 0.84782-0.93510 0.52677-0.07323-0.06092-0.34672
  -6   2   462501.9810645.31   1-0.19217-0.24343 0.97592-0.82502-0.10312 0.50996
  -2  -4  -3  773.04  803.22   1-0.64394 0.29399 0.64732-0.95038-0.40780 0.10162
  -6   2   3 2429.06 1101.85   1-0.36737-0.07007 0.82472-0.67319-0.42995 0.73613
  -4   6  -3  560.10 1552.72   1 0.87526-0.96255 0.48228-0.02874-0.03616-0.26956
  -6   2   3 2041.00 1267.32   1-0.13473-0.30087 0.97549-0.82459-0.17394 0.47908
  -2  -4  -246349.13 8709.04   1-0.67055 0.32060 0.62312-0.92618-0.40258 0.19846
  -6   2   238505.56 4001.57   1-0.18155-0.25598 0.88841-0.73684-0.42160 0.62571
  -4   6  -241313.48 3371.54   1 0.89497-0.98225 0.44582 0.00771-0.01642-0.18739
  -6   2   248044.05 3935.27   1-0.07242-0.36318 0.96613-0.81523-0.24767 0.45109
  -2  -4  -1 9506.20 1849.84   1-0.71090 0.36118 0.58285-0.88572-0.39355 0.29159
  -6   2   110132.46 3083.20   1-0.03438-0.40316 0.91425-0.76268-0.40368 0.50574
  -4   6  -1 6800.81 1871.23   1 0.90726-0.99455 0.42054 0.03299-0.00301-0.09890
  -6   2   1 7032.33 3092.72   1-0.00399-0.43203 0.94591-0.79487-0.32437 0.42605
  -2  -4   0112424.9 6228.58   1-0.76149 0.41176 0.52594-0.82881-0.37882 0.37882
  -6   2   0125451.4 6688.91   1 0.07368-0.51123 0.92004-0.76847-0.38481 0.38481
  -4   6   0116283.9 4770.06   1 0.91179-0.99907 0.41064 0.04289 0.00218-0.00218
  -6   2   0123753.1 6842.00   1 0.07149-0.50752 0.91126-0.76021-0.40557 0.40557
  -2  -4   1 8470.25 2984.03   1-0.81692 0.46719 0.45233-0.75521-0.35781 0.45976
  -6   2  -110517.15 3485.37   1 0.14707-0.58461 0.91762-0.76605-0.36924 0.26718
  -4   6   1 6829.37 1409.04   1 0.90661-0.99390 0.42193 0.03160-0.00374 0.10565
  -6   2  -1 9415.59 3303.93   1 0.15537-0.59141 0.85747-0.70642-0.49050 0.38882
  -2  -4   233944.93 4699.34   1-0.87168 0.52196 0.36260-0.66547-0.32965 0.53356
  -6   2  -241780.08 3382.44   1 0.19122-0.62876 0.91362-0.76205-0.35877 0.15465
  -4   6   244143.48 2659.87   1 0.88597-0.97326 0.46301-0.00947-0.02567 0.22949
  -2  -4   3 2616.38 1414.52   1-0.92032 0.57060 0.25811-0.56098-0.29388 0.59975
  -6   2  -3 2391.51 1370.30   1 0.21106-0.64861 0.91119-0.75962-0.35378 0.04761
  -4   6   3 1618.69  814.36   1 0.83346-0.92074 0.54774-0.09420-0.07288 0.37861
  -6   2  -459006.28 5014.40   1 0.21044-0.64799 0.91128-0.75971-0.35394-0.05428
   2   4  -456805.42 4244.38   1 0.95787-0.60879-0.14069 0.44300 0.25037-0.65811
  -4   6   454713.94 4942.90   1 0.13861-0.22581 0.86955-0.41641-0.47398 0.88068
  -6   2  -5 2495.95 1732.85   1 0.19204-0.62959 0.91353-0.76196-0.35856-0.15172
   2   4  -5 3671.29 1842.75   1 0.97986-0.63078-0.01318 0.31549 0.19924-0.70892
  -4   6   5 2439.61 1232.98   1 0.03023-0.11744 0.93178-0.47864-0.36174 0.87011
  -6   2  -613855.92 4204.70   1 0.15749-0.59503 0.91685-0.76528-0.36684-0.24550
   2   4  -611831.13 1970.59   1 0.98246-0.63339 0.12205 0.18025 0.14093-0.75254
  -4   6   614372.01 7306.68   1-0.07236-0.01475 0.96611-0.51342-0.24774 0.85800
  -6   2  -7  804.71  914.38   1 0.10739-0.54493 0.91957-0.76800-0.37794-0.33646
  -4   6   7  827.17  881.34   1-0.16573 0.07860 0.97673-0.52404-0.13608 0.84805
  -5   6  -7 2027.45 1598.28   1 0.63153-0.80627 0.74900-0.29500-0.20038-0.51272
  -5   6  -657087.75 4741.76   1 0.68677-0.86133 0.70650-0.25296-0.17089-0.44057
  -1  -5  -5 8728.78 2889.99   1-0.79667 0.49066 0.48085-0.85943-0.36619-0.14358
  -5   6  -5 6349.77 1931.22   1 0.73180-0.90636 0.66604-0.21250-0.14440-0.36515
  -6   1   5 8415.83 3333.93   1-0.31041-0.16874 0.94915-0.87371 0.05231 0.45623
  -1  -5  -4 9943.82 2864.65   1-0.78222 0.47621 0.49999-0.87858-0.37165-0.03616
  -6   1   4 9662.27 2734.38   1-0.66338 0.18219 0.62980-0.55403-0.40406 0.81230
  -5   6  -410131.36 2351.02   1 0.76731-0.94188 0.62964-0.17610-0.12155-0.28608
  -6   1   410424.96 3908.44   1-0.26936-0.20980 0.96303-0.88758-0.00325 0.41009
  -1  -5  -322891.39 5118.64   1-0.78442 0.47841 0.49713-0.87572-0.37084 0.06498
  -6   1   318157.75 2890.56   1-0.49583 0.01464 0.75678-0.68102-0.42593 0.73211
  -5   6  -318490.10 2687.06   1 0.79377-0.96834 0.59939-0.14585-0.10317-0.20256
  -6   1   320363.52 7804.07   1-0.22701-0.25214 0.97211-0.89666-0.05874 0.36387
  -1  -5  -2188020.3 5804.96   1-0.80052 0.49451 0.47558-0.85417-0.36466 0.16075
  -6   1   2186170.2 5672.08   1-0.34042-0.14075 0.83635-0.76059-0.42966 0.63378
  -5   6  -2198095.0 6606.78   1 0.81117-0.98574 0.57778-0.12424-0.09034-0.11348
  -6   1   2182543.7 5327.67   1-0.18340-0.29575 0.97639-0.90094-0.11412 0.31754
  -1  -5  -121139.50 2774.03   1-0.82719 0.52118 0.43703-0.81562-0.35319 0.25123
  -6   1   122225.37 3770.74   1-0.20853-0.27275 0.88138-0.80559-0.42388 0.52594
  -5   6  -122567.28 2801.28   1 0.81871-0.99328 0.56793-0.11439-0.08457-0.01734
  -6   1   119194.51 1851.56   1-0.13860-0.34056 0.97577-0.90032-0.16926 0.27097
  -1  -5   0 9973.03 3136.11   1-0.86057 0.55456 0.38262-0.76121-0.33616 0.33616
  -6   1   0 9547.79 3533.32   1-0.10417-0.37712 0.90460-0.82882-0.41331 0.41331
  -5   6   0 7944.33 1930.30   1 0.81427-0.98883 0.57377-0.12023-0.08798 0.08798
  -6   1   0 9954.63 3264.15   1-0.09276-0.38640 0.97017-0.89472-0.22395 0.22395
  -1  -5   124120.19 5876.68   1-0.89643 0.59042 0.31352-0.69211-0.31323 0.41518
  -6   1  -122024.37 7361.96   1-0.02798-0.45331 0.91490-0.83911-0.40270 0.30064
  -5   6   121622.78 2204.63   1 0.79298-0.96754 0.60034-0.14680-0.10374 0.20565
  -6   1  -122020.87 1901.36   1-0.04628-0.43288 0.95955-0.88410-0.27767 0.17596
  -1  -5   2190345.0 6096.22   1-0.93048 0.62447 0.23115-0.60974-0.28418 0.48809
  -6   1  -2184883.7 6215.04   1 0.02203-0.50333 0.91865-0.84287-0.39443 0.19032
  -5   6   2169317.4 4574.66   1 0.74403-0.91860 0.65399-0.20045-0.13674 0.34056
  -6   1  -318085.94 8065.30   1 0.04866-0.52996 0.91969-0.84390-0.38961 0.08344
  -5   6   316747.39 1624.71   1 0.64145-0.81620 0.74187-0.28787-0.19532 0.50093
   1   5  -318833.17 2741.36   1 0.95871-0.65327-0.13726 0.51514 0.24904-0.55484
  -6   1  -315846.17 1178.68   1 0.03994-0.51958 0.92729-0.85177-0.37219 0.06716
  -6   1  -4 9279.16 3007.61   1 0.05461-0.53590 0.91982-0.84404-0.38849-0.01973
   1   5  -4 7501.08 2250.14   1 0.97760-0.67216-0.03369 0.41157 0.20772-0.61546
  -5   6   4 7203.16 1994.62   1 0.11206-0.28648 0.88729-0.43415-0.44737 0.85406
  -6   1  -5 7130.17 3687.54   1 0.04203-0.52333 0.91949-0.84371-0.39084-0.11944
   1   5  -5 8668.60 2127.93   1 0.98397-0.67852 0.07743 0.30045 0.16064-0.67031
  -5   6   5 5735.58 1913.98   1 0.01500-0.18942 0.93839-0.48525-0.34523 0.85360
  -6   1  -650010.6411931.09   1 0.01237-0.49367 0.91811-0.84233-0.39611-0.21623
   1   5  -646168.49 4303.18   1 0.97499-0.66955 0.19418 0.18369 0.10807-0.71969
  -5   6   646459.4216032.89   1-0.07754-0.09669 0.96723-0.51454-0.24173 0.85199
  -6   1  -7 1576.39 1032.81   1-0.03378-0.44751 0.91431-0.83852-0.40359-0.31081
   1   5  -7 1665.77 1301.22   1 0.94782-0.64238 0.31481 0.06306 0.05023-0.76378
  -5   6   7 2008.27 1182.69   1-0.16283-0.01140 0.97671-0.52402-0.13965 0.85162
  -6   6  -7 4116.51 2119.99   1 0.54730-0.80942 0.80179-0.34779-0.23995-0.47314
  -6   6  -631099.39 4024.57   1 0.60022-0.86234 0.77017-0.31617-0.21576-0.39546
  -6   0   5 9722.51 2735.15   1-0.84485 0.32027 0.40922-0.40922-0.34460 0.85437
  -6   6  -513171.78 2750.85   1 0.64265-0.90477 0.74099-0.28699-0.19470-0.31465
   0  -6  -419240.45 6297.90   1-0.89677 0.63448 0.31279-0.76709-0.31298-0.09483
  -6   0   419317.42 6785.37   1-0.72405 0.19947 0.56884-0.56884-0.39006 0.79788
  -6   6  -419237.19 3051.54   1 0.67511-0.93723 0.71604-0.26204-0.17744-0.23004
   0   6   415302.61 6563.76   1 0.17649 0.08512 0.84128-0.38814-0.51096 0.91765
   0  -6  -313853.85 2636.71   1-0.89230 0.63000 0.32221-0.77651-0.31618 0.01032
  -6   0   315025.03 5151.66   1-0.59428 0.06935 0.68843-0.68843-0.41579 0.72197
  -6   6  -314177.21 2749.62   1 0.69769-0.95954 0.69720-0.24366-0.16469-0.14104
  -6   0   313526.81 5118.71   1-0.31566-0.20706 0.94700-0.94700 0.05954 0.24558
   0  -6  -258066.63 5184.79   1-0.89810 0.63581 0.30992-0.76423-0.31200 0.10809
  -6   0   259978.54 7855.75   1-0.46842-0.05650 0.77313-0.77313-0.42759 0.63171
  -6   6  -265035.80 5030.58   1 0.70946-0.97131 0.68683-0.23329-0.15785-0.04597
  -6   0   250144.64 3308.28   1-0.29093-0.23179 0.95639-0.95639 0.02571 0.17770
   0  -6  -131663.02 6436.92   1-0.91154 0.64924 0.27962-0.73393-0.30149 0.19954
  -6   0   129495.47 5919.40   1-0.35596-0.16896 0.82975-0.82975-0.42987 0.53193
  -6   6  -128950.42 3014.36   1 0.70877-0.97062 0.68745-0.23391-0.15826 0.05635
  -6   0   129234.06 3584.80   1-0.27137-0.25135 0.96247-0.96247-0.00057 0.10228
   0  -6   027302.16 3107.64   1-0.92953 0.66723 0.23379-0.68810-0.28514 0.28514
  -6   0   028272.37 4007.97   1-0.26252-0.26252 0.86506-0.86506-0.42748 0.42748
  -6   6   027687.41 2740.12   1 0.69214-0.95399 0.70196-0.24842-0.16785 0.16785
  -6   0   029659.93 6911.23   1-0.26136-0.26136 0.96514-0.96514-0.01387 0.01387
  -6   0  -127309.38 2936.06   1-0.19034-0.33470 0.88620-0.88620-0.42238 0.32032
  -6   6   127139.92 2617.63   1 0.65277-0.91489 0.73348-0.27948-0.18943 0.29131
   0   6  -132710.24 2956.92   1 0.94872-0.68691-0.17477 0.62823 0.26338-0.36532
  -6   0  -126465.51 1695.78   1-0.27106-0.25165 0.96255-0.96255-0.00098-0.10072
  -6   0  -259363.47 4836.95   1-0.13991-0.38513 0.89785-0.89785-0.41745 0.21334
  -6   6   262973.44 3232.03   1 0.57847-0.84058 0.78377-0.32977-0.22597 0.42971
   0   6  -263135.99 4211.13   1 0.96623-0.70442-0.10365 0.55711 0.23590-0.43977
  -6   0  -314717.05 6904.09   1-0.11034-0.41471 0.90353-0.90353-0.41406 0.10789
  -6   6   314806.38 1795.27   1 0.44288-0.70500 0.85107-0.39706-0.28200 0.58762
   0   6  -312579.92 2641.21   1 0.97887-0.71706-0.02270 0.47616 0.20319-0.50899
  -6   6   316914.51 4430.62   1 0.17187-0.43349 0.84493-0.39179-0.50651 0.81153
  -6   0  -420534.87 6238.94   1-0.10025-0.42480 0.90527-0.90527-0.41282 0.00459
   0   6  -417284.65 2874.02   1 0.98398-0.72217 0.06631 0.38714 0.16547-0.57321
  -6   6   416755.24 4255.65   1 0.08182-0.34344 0.90551-0.45237-0.41634 0.82304
  -6   0  -512894.92 4915.42   1-0.10831-0.41674 0.90389-0.90389-0.41382-0.09646
   0   6  -511311.31 2567.71   1 0.97913-0.71733 0.16170 0.29175 0.12302-0.63270
  -6   6   511621.04 2781.40   1-0.00534-0.25628 0.94642-0.49328-0.32288 0.83126
  -6   0  -615728.01 6697.52   1-0.13355-0.39149 0.89915-0.89915-0.41676-0.19558
   0   6  -625052.64 3473.03   1 0.96209-0.70028 0.26190 0.19155 0.07607-0.68768
  -6   6   623374.48 7781.39   1-0.08904-0.17231 0.96950-0.51681-0.22831 0.83857
  -6   0  -7 2189.54  956.05   1-0.17564-0.34941 0.88986-0.88986-0.42105-0.29334
   0   6  -7 1247.52  847.67   1 0.93026-0.66841 0.36600 0.08752 0.02523-0.73861
  -6   6   7 2017.11 1024.46   1-0.16703-0.09433 0.97673-0.52404-0.13447 0.84645
  -1   7  -7 1331.99 1578.93   1 0.90978-0.69157 0.41508 0.11404-0.00013-0.71324
  -7   6   7  952.11  813.72   1-0.17683-0.17165 0.97661-0.52391-0.12232 0.83429
  -6  -1  -6 8924.10 3211.05   1-0.27304-0.29575 0.86152-0.93731-0.42803-0.18431
  -1   7  -610183.08 2887.29   1 0.94429-0.72609 0.32593 0.20319 0.04542-0.65689
  -7   6   6 7638.82 4325.77   1-0.10551-0.24297 0.97222-0.51952-0.20891 0.81917
  -6  -1  -5 4672.73 2419.49   1-0.25116-0.31763 0.86874-0.94453-0.42683-0.08345
  -1   7  -5 4198.83 2135.78   1 0.96695-0.74878 0.23975 0.28928 0.08667-0.59634
  -7   6   5 3992.08 2371.29   1-0.02973-0.31909 0.95482-0.50168-0.29567 0.80404
  -6  -1  -424718.55 5155.69   1-0.24581-0.32299 0.87043-0.94622-0.42651 0.01827
  -1   7  -425486.48 3411.01   1 0.97946-0.76129 0.15861 0.37042 0.12443-0.53217
  -7   6   428863.41 8124.98   1 0.04861-0.39744 0.92311-0.46997-0.38144 0.78813
  -6  -1  -3 5039.38 1923.45   1-0.25738-0.31142 0.86674-0.94253-0.42720 0.12102
  -7   6   3 4946.29 2494.74   1 0.27219-0.62169 0.90111-0.44711-0.33749 0.64311
  -1   7  -3 4491.21 1974.97   1 0.98390-0.76573 0.08346 0.44557 0.15800-0.46380
  -7   6   3 7159.71 3347.71   1 0.12935-0.47818 0.87592-0.42278-0.46477 0.76979
  -6  -1  -228470.21 4313.68   1-0.28658-0.28208 0.85713-0.93289-0.42801 0.22389
  -7   6   228308.92 2691.02   1 0.41895-0.76844 0.86021-0.40620-0.29071 0.49445
  -1   7  -223912.55 2672.35   1 0.98221-0.76404 0.01582 0.51321 0.18709-0.39096
  -6  -1  -111661.18 3978.40   1-0.33327-0.23539 0.83930-0.91507-0.42952 0.32746
  -1   7  -112631.45 2643.56   1 0.97647-0.75829-0.04263 0.57167 0.21138-0.31332
  -6  -1   038506.38 6685.18   1-0.39740-0.17126 0.81074-0.88651-0.42984 0.42984
  -7   6   045477.31 3704.43   1 0.56152-0.91101 0.79378-0.33977-0.23366 0.23366
  -1   7   044906.64 3596.24   1 0.96889-0.75071-0.09005 0.61909 0.23051-0.23051
  -6  -1   112244.10 4299.96   1-0.47749-0.09117 0.76784-0.84361-0.42709 0.52915
  -7   6  -111265.72 2384.17   1 0.58936-0.93885 0.77707-0.32307-0.22090 0.11903
  -1   7   111387.11 2317.84   1 0.96177-0.74359-0.12431 0.65335 0.24401-0.14207
  -6  -1   233341.92 9059.67   1-0.57049 0.00182 0.70644-0.78220-0.41889 0.62301
  -7   6  -228753.25 3514.30   1 0.59882-0.94831 0.77108-0.31707-0.21643 0.01269
  -1   7   227487.27 2938.01   1 0.95734-0.73917-0.14281 0.67185 0.25118-0.04731
  -6  -1   3 6477.44 3003.36   1-0.67139 0.10271 0.62233-0.69809-0.40241 0.70859
  -7   6  -3 6536.41 2645.00   1 0.59385-0.94334 0.77425-0.32024-0.21879-0.08682
  -1   7   3 5566.99 1825.71   1 0.95754-0.73937-0.14201 0.67105 0.25087 0.05492
  -6  -1   428437.7110023.75   1-0.77283 0.20453 0.51196-0.58767-0.37499 0.78281
  -7   6  -428787.53 3907.51   1 0.57673-0.92622 0.78482-0.33082-0.22677-0.18071
  -1   7   432484.19 2927.15   1 0.96353-0.74536-0.11640 0.64544 0.24092 0.16681
  -6  -1   5 4540.69 2192.41   1-0.86615 0.29785 0.37271-0.44842-0.33295 0.84273
  -7   6  -5 5993.62 2320.82   1 0.54865-0.89814 0.80105-0.34704-0.23937-0.26999
  -7   6  -7  331.29 1239.11   1 0.46070-0.81019 0.84377-0.38977-0.27531-0.43779
  -2   7  -710223.86 2529.21   1 0.87015-0.73922 0.49107 0.03805-0.04099-0.67238
  -7   5   7 7965.73 4841.81   1-0.21709-0.17495 0.97352-0.59628-0.07150 0.78347
  -5  -2  -638374.1011071.53   1-0.37677-0.14815 0.82046-0.97199-0.42997-0.18239
  -2   7  -645680.75 4421.97   1 0.91168-0.78076 0.41087 0.11825 0.00206-0.61353
  -7   5   645647.9710339.46   1-0.15165-0.24039 0.97646-0.59921-0.15338 0.76364
  -5  -2  -522753.30 5138.45   1-0.35423-0.17068 0.83050-0.98203-0.42986-0.08044
  -2   7  -526152.42 3681.71   1 0.94190-0.81097 0.33327 0.19585 0.04176-0.55131
  -7   5   526175.87 9945.78   1-0.08222-0.30982 0.96819-0.59095-0.23628 0.74483
  -5  -2  -4 1436.54 1422.05   1-0.34919-0.17573 0.83266-0.98420-0.42980 0.02155
  -2   7  -4 1173.43 1996.26   1 0.96270-0.83180 0.25924 0.26978 0.07735-0.48509
  -7   5   4  641.75 1019.88   1-0.00822-0.38420 0.94748-0.56986-0.31969 0.72638
  -5  -2  -362291.50 9995.79   1-0.36167-0.16325 0.82725-0.97879-0.42992 0.12374
  -7   5   355660.32 5360.46   1 0.09039-0.48418 0.91995-0.54102-0.38146 0.68764
  -2   7  -358027.63 4272.92   1 0.97544-0.84454 0.19105 0.33798 0.10953-0.41533
  -7   5   352794.99 8785.12   1 0.06878-0.46121 0.91272-0.53510-0.40274 0.70777
  -5  -2  -2127267.7 6834.81   1-0.39168-0.13323 0.81349-0.96502-0.42989 0.22577
  -7   5   2137466.6 8035.33   1 0.26121-0.65439 0.90320-0.52486-0.34057 0.54431
  -2   7  -2131862.2 6411.10   1 0.98195-0.85104 0.12996 0.39906 0.13738-0.34125
  -7   5   2129129.913076.67   1 0.14859-0.54102 0.86244-0.48482-0.48384 0.68719
  -5  -2  -173299.94 5009.74   1-0.43881-0.08611 0.78962-0.94115-0.42888 0.32681
  -7   5   176472.04 4203.65   1 0.37170-0.76488 0.87613-0.49779-0.30696 0.40883
  -2   7  -182150.53 4662.47   1 0.98396-0.85306 0.07797 0.45106 0.16040-0.26233
  -5  -2   0 5166.32 2443.27   1-0.50174-0.02318 0.75312-0.90465-0.42551 0.42551
  -7   5   0 4040.03 1946.09   1 0.44103-0.83421 0.85180-0.47347-0.28269 0.28269
  -2   7   0 3660.05 1287.20   1 0.98333-0.85242 0.03740 0.49163 0.17792-0.17792
  -5  -2   165124.3510763.28   1-0.57787 0.05294 0.70096-0.85249-0.41797 0.52004
  -7   5  -170727.76 4424.16   1 0.48093-0.87410 0.83495-0.45662-0.26748 0.16561
  -2   7   169877.29 3621.35   1 0.98190-0.85099 0.01114 0.51789 0.18906-0.08712
  -5  -2   2126345.711886.39   1-0.66306 0.13813 0.63009-0.78163-0.40413 0.60825
  -7   5  -2127284.8 6750.76   1 0.49891-0.89209 0.82663-0.44829-0.26031 0.05657
  -2   7   2137037.4 5755.86   1 0.98129-0.85039 0.00301 0.52602 0.19248 0.01138
  -5  -2   362442.92 4335.03   1-0.75139 0.22680 0.53799-0.68942-0.38206 0.68793
  -7   5  -356924.87 4672.46   1 0.49973-0.89291 0.82623-0.44790-0.25998-0.04563
  -2   7   364653.63 3599.43   1 0.98238-0.85148 0.01853 0.51050 0.18594 0.11986
  -5  -2   4 1553.36 1273.40   1-0.83613 0.31154 0.42321-0.57465-0.34895 0.75677
  -7   5  -4 1436.21 1283.66   1 0.48632-0.87950 0.83251-0.45417-0.26535-0.14213
  -2   7   4 1962.98  986.52   1 0.98398-0.85308 0.06709 0.46194 0.16514 0.24260
  -5  -2   523304.73 5868.07   1-0.90911 0.38453 0.28531-0.43674-0.30348 0.81325
  -7   5  -525584.16 3371.88   1 0.46035-0.85353 0.84392-0.46558-0.27544-0.23391
  -2   7   519864.70 5687.05   1 0.08216 0.04864 0.90532-0.37665-0.41670 0.92507
  -7   5  -652556.10 5004.16   1 0.42261-0.81579 0.85886-0.48052-0.28940-0.32183
  -7   5  -712227.38 2771.02   1 0.37318-0.76635 0.87567-0.49733-0.30647-0.40663
  -3   7  -7 4540.42 1935.60   1 0.81968-0.77604 0.56664-0.03751-0.08381-0.62956
  -7   4   7 8523.41 3034.43   1-0.26030-0.17530 0.96540-0.66360-0.01527 0.72724
  -4  -3  -630902.12 9607.56   1-0.49877 0.01758 0.75497-0.98227-0.42572-0.18663
  -3   7  -632591.99 3732.17   1 0.86660-0.82296 0.49702 0.03210-0.04428-0.56718
  -7   4   637768.30 6688.95   1-0.20174-0.23386 0.97519-0.67340-0.09105 0.70131
  -4  -3  -510849.95 4532.31   1-0.47514-0.00603 0.76922-0.99652-0.42723-0.08307
  -3   7  -510799.23 2741.89   1 0.90293-0.85929 0.42969 0.09943-0.00784-0.50171
  -7   4   515135.23 5776.69   1-0.13948-0.29611 0.97583-0.67403-0.16819 0.67674
  -4  -3  -4 9413.55 3967.68   1-0.46961-0.01156 0.77244-0.99974-0.42753 0.01929
  -3   7  -4 9813.70 3947.96   1 0.93024-0.88660 0.36608 0.16304 0.02519-0.43284
  -7   4   410005.73 4765.72   1-0.07326-0.36234 0.96631-0.66452-0.24670 0.65354
  -4  -3  -323164.05 6763.12   1-0.48163 0.00044 0.76539-0.99269-0.42685 0.12067
  -7   4   324155.64 6235.22   1-0.09065-0.34688 0.90684-0.60370-0.41160 0.71778
  -3   7  -320689.03 3050.38   1 0.95002-0.90639 0.30748 0.22155 0.05386-0.35967
  -7   4   327370.6511691.10   1-0.00248-0.43355 0.94534-0.64325-0.32605 0.63107
  -4  -3  -2126124.610666.75   1-0.51049 0.02931 0.74759-0.97489-0.42485 0.22073
  -7   4   2130111.3 9360.54   1 0.08778-0.52532 0.91998-0.61684-0.38200 0.58611
  -3   7  -2144162.1 6308.84   1 0.96334-0.91970 0.25646 0.27257 0.07868-0.28255
  -7   4   2138688.0 8857.85   1 0.07182-0.50785 0.91107-0.60898-0.40592 0.60927
  -4  -3  -125331.69 6974.26   1-0.55490 0.07371 0.71770-0.94500-0.42068 0.31862
  -7   4   126038.13 4667.40   1 0.21302-0.65056 0.91093-0.60779-0.35328 0.45534
  -3   7  -124626.69 2943.40   1 0.97165-0.92802 0.21495 0.31408 0.09838-0.20032
  -7   4   127159.28 7175.91   1 0.14950-0.58554 0.86178-0.55968-0.48474 0.58642
  -4  -3   010343.97 3621.62   1-0.61259 0.13140 0.67385-0.90115-0.41310 0.41310
  -7   4   010021.87 2448.11   1 0.29737-0.73423 0.89583-0.59316-0.33022 0.33022
  -3   7   010584.02 2094.12   1 0.97618-0.93255 0.18580 0.34323 0.11196-0.11196
  -4  -3   125317.08 8570.16   1-0.68010 0.19892 0.61402-0.84132-0.40053 0.50259
  -7   4  -122053.84 2894.89   1 0.34961-0.78648 0.88264-0.57997-0.31416 0.21229
  -3   7   120653.52 2302.16   1 0.97787-0.93424 0.17275 0.35628 0.11797-0.01603
  -4  -3   2130652.1 6350.62   1-0.75262 0.27174 0.53654-0.76369-0.38168 0.58559
  -7   4  -2135576.3 6078.85   1 0.37729-0.81416 0.87438-0.57172-0.30510 0.10135
  -3   7   2133220.0 4543.45   1 0.97682-0.93319 0.18104 0.34799 0.11415 0.08971
  -4  -3   323389.01 9216.89   1-0.82483 0.34396 0.44060-0.66775-0.35427 0.66014
  -7   4  -326886.17 3671.00   1 0.38536-0.82223 0.87180-0.56914-0.30238-0.00322
  -3   7   328935.65 2450.24   1 0.97098-0.92734 0.21878 0.31025 0.09658 0.20922
  -4  -3   4 7607.89 3196.69   1-0.89038 0.40951 0.32617-0.55332-0.31752 0.72534
  -7   4  -4 9675.28 2074.79   1 0.37714-0.81400 0.87443-0.57176-0.30515-0.10233
  -7   4  -511323.28 3223.74   1 0.35468-0.79155 0.88120-0.57853-0.31253-0.19682
  -3   7   5 8864.28 4786.52   1 0.08272-0.03912 0.90500-0.37633-0.41728 0.92565
  -7   4  -635895.98 3602.40   1 0.31912-0.75599 0.89071-0.58804-0.32369-0.28753
  -3   7   630922.36 8077.83   1-0.03426 0.07786 0.95623-0.42757-0.29057 0.90062
  -7   4  -7 4535.37 2023.71   1 0.27077-0.70763 0.90139-0.59872-0.33789-0.37521
  -4   7  -7 5890.51 2417.09   1 0.75901-0.80265 0.63854-0.10942-0.12706-0.58631
  -7   3   7 5793.72 2788.94   1-0.30532-0.17383 0.95116-0.72481 0.04532 0.66664
  -4   7  -638455.38 4752.59   1 0.80920-0.85284 0.58030-0.05117-0.09182-0.51964
  -7   3   638453.9515024.17   1-0.25437-0.22479 0.96683-0.74048-0.02310 0.63336
  -3  -4  -510195.37 2667.30   1-0.60804 0.17060 0.67753-0.98060-0.41379-0.09650
  -4   7  -5 9571.09 2201.65   1 0.84938-0.89302 0.52439 0.00473-0.05958-0.44997
  -7   3   5 8794.31 4353.21   1-0.20050-0.27866 0.97530-0.74895-0.09262 0.60117
  -3  -4  -4 8330.27 5246.32   1-0.60054 0.16310 0.68351-0.98658-0.41490 0.00666
  -7   3   4 8700.99 2657.01   1-0.46401-0.01716 0.77566-0.54836-0.42781 0.83606
  -4   7  -4 8285.19 2197.60   1 0.88087-0.92451 0.47235 0.05676-0.03074-0.37690
  -7   3   411438.41 3123.83   1-0.14342-0.33573 0.97607-0.74972-0.16340 0.57025
  -3  -4  -328709.41 7060.19   1-0.60982 0.17238 0.67609-0.97916-0.41352 0.10734
  -7   3   321495.69 6536.99   1-0.25328-0.22801 0.86807-0.64071-0.42696 0.73313
  -4   7  -329173.30 4270.34   1 0.90473-0.94837 0.42593 0.10319-0.00585-0.29988
  -7   3   330401.87 9732.69   1-0.08281-0.39635 0.96831-0.74196-0.23559 0.54072
  -3  -4  -2123818.6 9916.18   1-0.63444 0.19700 0.65558-0.95864-0.40950 0.20538
  -7   3   2120472.2 4621.23   1-0.08281-0.39848 0.90805-0.68069-0.41058 0.61470
  -4   7  -2135354.8 5874.40   1 0.92188-0.96552 0.38719 0.14193 0.01437-0.21819
  -7   3   2139190.3 9588.53   1-0.01809-0.46153 0.95098-0.72441-0.30871 0.51206
  -3  -4  -124592.27 5834.25   1-0.67232 0.23488 0.62145-0.92451-0.40221 0.30015
  -7   3   124067.51 3726.67   1 0.04654-0.52784 0.91963-0.69227-0.39000 0.49206
  -4   7  -123567.56 5132.45   1 0.93300-0.97664 0.35870 0.17042 0.02894-0.13086
  -7   3   128483.45 8169.60   1 0.05031-0.52995 0.92227-0.69570-0.38324 0.48491
  -3  -4   010240.52 4422.53   1-0.72036 0.28321 0.57283-0.87570-0.39106 0.39106
  -7   3   012527.51 4287.25   1 0.13935-0.62065 0.91812-0.69076-0.37098 0.37098
  -4   7   0 8906.72 1673.71   1 0.93834-0.98199 0.34375 0.18537 0.03650-0.03650
  -7   3   011336.07 4091.65   1 0.12258-0.60221 0.88046-0.65389-0.45798 0.45798
  -3  -4   129839.09 8758.53   1-0.77524 0.33808 0.50892-0.81179-0.37415 0.47610
  -7   3  -124420.22 8041.18   1 0.20138-0.68268 0.91243-0.68507-0.35624 0.25418
  -4   7   125523.24 2978.64   1 0.93730-0.98094 0.34674 0.18238 0.03499 0.06691
  -3  -4   2115862.6 9599.88   1-0.83218 0.39503 0.42937-0.73224-0.35085 0.55476
  -7   3  -2110562.2 5570.22   1 0.23799-0.71929 0.90726-0.67990-0.34675 0.14263
  -4   7   2140000.4 4746.64   1 0.92721-0.97085 0.37393 0.15519 0.02118 0.18263
  -3  -4   321944.09 5085.33   1-0.88631 0.44915 0.33443-0.63730-0.32031 0.62617
  -7   3  -323533.50 3864.38   1 0.25404-0.73459 0.90449-0.67749-0.34255 0.03693
  -4   7   325950.13 2321.54   1 0.90029-0.94393 0.43515 0.09397-0.01073 0.31647
  -3  -4   4 7868.31 2175.62   1-0.93266 0.49550 0.22503-0.52790-0.28195 0.68977
  -7   3  -411277.08 3186.50   1 0.25179-0.73234 0.90489-0.67789-0.34317-0.06431
  -4   7   4 9047.49 3289.38   1 0.18334-0.22694 0.83580-0.30713-0.51751 0.92420
  -7   3  -512481.57 4365.69   1 0.23309-0.71439 0.90803-0.68067-0.34805-0.16223
   3   4  -5 9784.96 2156.62   1 0.96648-0.53014-0.10240 0.40471 0.23541-0.74509
  -4   7   5 8171.49 2866.45   1 0.07442-0.11802 0.90965-0.38099-0.40864 0.91701
  -7   3  -637217.18 9246.93   1 0.20064-0.68194 0.91252-0.68517-0.35642-0.25592
   3   4  -630093.09 2988.49   1 0.98306-0.54672 0.03116 0.27114 0.18058-0.79219
  -4   7   629963.58 2915.83   1-0.03092-0.01267 0.95520-0.42653-0.29433 0.90438
  -7   3  -7 6542.06 2328.08   1 0.15428-0.63558 0.91710-0.68974-0.36758-0.34681
  -4   7   7 4185.86 1990.78   1-0.13119 0.08762 0.97520-0.44705-0.17822 0.89020
  -5   7  -710089.69 2834.37   1 0.68964-0.82057 0.70408-0.17495-0.16927-0.54410
  -5   7  -652374.95 4895.39   1 0.74092-0.87184 0.65710-0.12797-0.13871-0.47275
  -7   2   648389.6318384.77   1-0.30795-0.21476 0.95014-0.79924 0.04893 0.56132
  -2  -5  -524031.46 6266.29   1-0.73996 0.34652 0.55118-0.92977-0.38554-0.12423
  -5   7  -525579.92 3769.73   1 0.78248-0.91340 0.61266-0.08353-0.11117-0.39838
  -7   2   525991.58 6688.75   1-0.26319-0.25953 0.96467-0.81377-0.01145 0.52000
  -2  -5  -4 1754.66  945.67   1-0.72928 0.33584 0.56313-0.94172-0.38861-0.01920
  -7   2   4 2276.95  837.14   1-0.56417 0.03925 0.71105-0.55952-0.41964 0.82788
  -5   7  -4 1652.70 2108.41   1 0.81534-0.94626 0.57237-0.04325-0.08716-0.32047
  -7   2   4 1941.21 1633.59   1-0.21657-0.30614 0.97359-0.82269-0.07216 0.47900
  -2  -5  -358683.06 8833.43   1-0.73374 0.34030 0.55818-0.93677-0.38735 0.08148
  -7   2   347391.82 7323.77   1-0.38922-0.13570 0.81466-0.66312-0.42991 0.73610
  -5   7  -357387.38 4429.56   1 0.84020-0.97112 0.53807-0.00894-0.06734-0.23839
  -7   2   356534.37 6719.73   1-0.16802-0.35470 0.97673-0.82583-0.13325 0.43838
  -2  -5  -2124989.4 6566.10   1-0.75138 0.35794 0.53800-0.91658-0.38206 0.17815
  -5   7  -2126625.1 6040.08   1 0.85742-0.98834 0.51192 0.01720-0.05257-0.15124
  -7   2   2133541.4 6550.93   1-0.11740-0.40531 0.97379-0.82289-0.19476 0.39818
  -2  -5  -172447.5313503.39   1-0.77973 0.38629 0.50319-0.88178-0.37255 0.27060
  -7   2   170361.68 4964.13   1-0.11427-0.41077 0.90282-0.75125-0.41454 0.51659
  -5   7  -165698.53 4036.88   1 0.86686-0.99779 0.49658 0.03254-0.04404-0.05786
  -7   2   171157.95 6329.30   1-0.06460-0.45811 0.96432-0.81343-0.25670 0.35841
  -2  -5   0 4727.83 2000.45   1-0.81576 0.42231 0.45403-0.83261-0.35831 0.35831
  -7   2   0 4677.98 2029.31   1-0.02007-0.50497 0.91565-0.76408-0.40146 0.40146
  -5   7   0 3637.72 1430.89   1 0.86756-0.99848 0.49542 0.03370-0.04340 0.04340
  -7   2   0 4229.99 1808.85   1-0.00974-0.51349 0.94803-0.79699-0.31800 0.31800
  -2  -5   162965.08 6779.55   1-0.85588 0.46244 0.39076-0.76935-0.33876 0.44072
  -7   2  -169211.91 6438.36   1 0.04695-0.57200 0.91964-0.76807-0.38993 0.28787
  -5   7   171881.41 3933.78   1 0.85685-0.98778 0.51281 0.01631-0.05307 0.15498
  -7   2  -164781.00 4187.20   1 0.04720-0.57044 0.92380-0.77275-0.37994 0.27826
  -2  -5   2116728.3 7678.61   1-0.89622 0.50278 0.31395-0.69254-0.31337 0.51728
  -7   2  -2126591.4 6687.23   1 0.08983-0.61488 0.91995-0.76838-0.38158 0.17746
  -5   7   2129979.5 5088.39   1 0.82854-0.95946 0.55463-0.02550-0.07684 0.28066
  -7   2  -2124034.3 4790.06   1 0.10571-0.62895 0.89130-0.74025-0.44091 0.23756
  -2  -5   357497.53 4596.07   1-0.93284 0.53940 0.22451-0.60310-0.28176 0.58763
  -7   2  -358332.10 8323.25   1 0.11161-0.63666 0.91944-0.76787-0.37704 0.07087
  -5   7   355874.92 3017.56   1 0.76779-0.89872 0.62912-0.09999-0.12123 0.42696
  -7   2  -355078.35 2744.27   1 0.16425-0.68749 0.85080-0.69976-0.49914 0.19412
  -7   2  -4 3772.48 1845.96   1 0.11489-0.63994 0.91932-0.76775-0.37634-0.03188
   2   5  -4 1814.33 1508.40   1 0.96191-0.56920-0.12366 0.50154 0.24375-0.65149
  -5   7   4 1924.10 1585.46   1 0.15810-0.28891 0.85545-0.32678-0.49315 0.89985
  -7   2  -530809.86 9773.98   1 0.10162-0.62667 0.91973-0.76816-0.37915-0.13113
   2   5  -521977.26 3314.12   1 0.97988-0.58717-0.01298 0.39086 0.19916-0.70883
  -5   7   517087.44 7682.56   1 0.05953-0.19034 0.91760-0.38893-0.39301 0.90138
  -7   2  -643384.97 8389.20   1 0.07305-0.59810 0.92004-0.76847-0.38494-0.22740
   2   5  -639364.91 3497.65   1 0.98328-0.59057 0.10585 0.27202 0.14813-0.75975
  -5   7   640542.05 7540.88   1-0.03690-0.09377 0.95682-0.42868-0.28831 0.89857
  -7   2  -7 8096.71 3338.65   1 0.02970-0.55476 0.91902-0.76745-0.39307-0.32133
  -5   7   7 9595.05 5677.81   1-0.12748-0.00319 0.97487-0.44672-0.18269 0.89466
  -6   7  -7  894.98 1789.03   1 0.61371-0.83214 0.76129-0.23162-0.20924-0.50386
  -6   7  -6 8762.53 2041.06   1 0.66412-0.88255 0.72477-0.19510-0.18341-0.42782
  -6   7  -5 4059.46 2190.61   1 0.70483-0.92304 0.69095-0.16183-0.16056-0.34899
  -1  -6  -426028.62 5693.56   1-0.84192 0.49219 0.41398-0.86829-0.34609-0.06172
  -7   1   428618.41 5922.98   1-0.64245 0.07378 0.64862-0.57286-0.40808 0.81632
  -6   7  -431301.67 4178.08   1 0.73658-0.95479 0.66138-0.13226-0.14143-0.26621
  -7   1   428038.77 6482.83   1-0.28962-0.27666 0.95683-0.88139 0.02394 0.38289
  -1  -6  -3 4663.93 2123.08   1-0.84074 0.49101 0.41588-0.87019-0.34668 0.04082
  -7   1   3 5270.75 2194.12   1-0.50051-0.06815 0.75388-0.67811-0.42560 0.73178
  -6   7  -3 3749.24 1612.23   1 0.75959-0.97780 0.63793-0.10880-0.12668-0.17904
  -7   1   3 6117.79 3557.79   1-0.25415-0.31213 0.96688-0.89143-0.02338 0.32851
  -1  -6  -227992.83 7027.61   1-0.85020 0.50047 0.40038-0.85469-0.34182 0.13791
  -7   1   229260.31 9128.30   1-0.37066-0.19800 0.82324-0.74747-0.42996 0.63408
  -6   7  -227491.59 3569.47   1 0.77363-0.99184 0.62268-0.09355-0.11727-0.08654
  -7   1   227634.73 5893.41   1-0.21958-0.34670 0.97319-0.89775-0.06831 0.27173
  -1  -6  -111071.51 3491.21   1-0.86796 0.51823 0.36944-0.82374-0.33189 0.22993
  -7   1   111830.59 4894.53   1-0.25991-0.30889 0.86592-0.79013-0.42734 0.52940
  -6   7  -110945.04 2579.72   1 0.77774-0.99595 0.61806-0.08893-0.11446 0.01254
  -7   1   111253.64 3460.16   1-0.18694-0.37934 0.97622-0.90077-0.10970 0.21141
  -1  -6   041950.73 4674.78   1-0.89127 0.54155 0.32434-0.77864-0.31691 0.31691
  -7   1   042059.82 5190.45   1-0.17073-0.39807 0.89103-0.81525-0.42059 0.42059
  -6   7   048123.37 4174.51   1 0.76973-0.98794 0.62699-0.09786-0.11992 0.11992
  -7   1   040502.22 2626.87   1-0.15804-0.40824 0.97664-0.90119-0.14554 0.14554
  -1  -6   112096.88 4246.80   1-0.91710 0.56737 0.26618-0.72049-0.29675 0.39871
  -7   1  -112156.40 5250.99   1-0.10392-0.46488 0.90465-0.82886-0.41328 0.31122
  -7   1  -111038.99 3871.69   1-0.13644-0.42984 0.97562-0.90017-0.17187 0.07016
  -7   1  -227801.74 5313.46   1-0.05850-0.51030 0.91144-0.83565-0.40724 0.20312
  -6   7   223540.23 2221.73   1 0.69506-0.91327 0.69947-0.17034-0.16619 0.37002
  -7   1  -223820.95 1685.84   1-0.13043-0.43585 0.97513-0.89968-0.17914-0.02428
  -7   1  -3 5091.36 2478.32   1-0.03285-0.53595 0.91440-0.83862-0.40345 0.09728
  -6   7   3 4438.78 1275.25   1 0.60036-0.81879 0.77008-0.24041-0.21569 0.52131
   1   6  -3 5513.99 2207.08   1 0.96374-0.61466-0.11546 0.56892 0.24055-0.54635
  -7   1  -427247.83 5086.22   1-0.02529-0.54351 0.91516-0.83937-0.40228-0.00594
   1   6  -426832.90 3457.57   1 0.97859-0.62951-0.02526 0.47872 0.20424-0.61198
  -6   7   425466.02 7482.77   1 0.12898-0.34700 0.87617-0.34751-0.46440 0.87110
  -7   1  -5 5161.24 2226.50   1-0.03438-0.53442 0.91425-0.83846-0.40368-0.10660
   1   6  -5 3701.20 2124.65   1 0.98399-0.63491 0.07284 0.38061 0.16264-0.67231
  -6   7   5 4116.64 1677.57   1 0.03953-0.25755 0.92749-0.39882-0.37174 0.88011
  -7   1  -6 9165.19 3314.40   1-0.05912-0.50968 0.91136-0.83557-0.40733-0.20501
   1   6  -6 7322.29 2090.74   1 0.97729-0.62821 0.17743 0.27602 0.11581-0.72743
  -6   7   6 6260.58 2192.45   1-0.04816-0.16964 0.96008-0.43193-0.27554 0.88580
  -7   1  -7  814.54  795.89   1-0.09912-0.46968 0.90546-0.82967-0.41268-0.30172
   1   6  -7 -208.18  945.75   1 0.95574-0.60666 0.28718 0.16627 0.06382-0.77737
  -6   7   7  996.05 1709.13   1-0.13111-0.08669 0.97519-0.44705-0.17832 0.89029
  -7   7  -6 1287.64 1121.52   1 0.58125-0.88705 0.78208-0.25241-0.22469-0.38654
  -7   7  -5  548.08 2222.21   1 0.61959-0.92539 0.75731-0.22764-0.20634-0.30301
   0  -7  -4125410.1 5098.96   1-0.92476 0.61875 0.24663-0.77666-0.28978-0.11803
  -7   0   4110861.1 4958.86   1-0.70534 0.09292 0.58886-0.58886-0.39462 0.80287
  -7   7  -4117247.9 6221.24   1 0.64842-0.95423 0.73674-0.20707-0.19171-0.21577
   0  -7  -3  -50.34 1000.91   1-0.91985 0.61384 0.25931-0.78934-0.29431-0.01154
  -7   0   3  410.47  801.49   1-0.59086-0.02155 0.69108-0.69108-0.41626 0.72245
  -7   7  -3 -485.93 1617.86   1 0.66764-0.97344 0.72201-0.19234-0.18151-0.12410
   0  -7  -2 2907.05 1211.33   1-0.92258 0.61657 0.25235-0.78237-0.29182 0.08791
  -7   0   2 3929.67 1605.77   1-0.48248-0.12993 0.76488-0.76488-0.42680 0.63092
  -7   7  -2 2379.96 1623.21   1 0.67651-0.98231 0.71492-0.18525-0.17668-0.02706
   0  -7  -1  903.54 1085.89   1-0.93125 0.62524 0.22901-0.75904-0.28340 0.18145
  -7   0   1  248.68 1087.93   1-0.38636-0.22605 0.81601-0.81601-0.42993 0.53199
  -7   7  -1 1633.40 2264.31   1 0.67343-0.97923 0.71740-0.18773-0.17837 0.07650
  -7   0   1  411.48  756.71   1-0.30575-0.30409 0.95100-0.95100 0.04590 0.05580
  -7   0   0226499.3 8429.14   1-0.30620-0.30620 0.84993-0.84993-0.42877 0.42877
  -7   7   0232590.1 6701.66   1 0.65539-0.96119 0.73150-0.20183-0.18806 0.18806
  -7   0  -1  652.79 1042.33   1-0.24374-0.36881 0.87108-0.87108-0.42638 0.32432
  -7   7   1 1308.79 2045.43   1 0.61700-0.92281 0.75907-0.22940-0.20762 0.30949
   0   7  -1  327.05 1603.99   1 0.95755-0.65210-0.14199 0.67103 0.25086-0.35280
  -7   0  -2 3583.29 1719.86   1-0.19929-0.41327 0.88387-0.88387-0.42313 0.21902
  -7   7   2 1897.87  935.13   1 0.54855-0.85436 0.80110-0.27143-0.23941 0.44315
   0   7  -2 2389.45 2235.59   1 0.97055-0.66511-0.08094 0.60998 0.22688-0.43075
  -7   0  -3  335.75  627.30   1-0.17248-0.44007 0.89062-0.89062-0.42076 0.11458
  -7   7   3  554.93  805.01   1 0.43146-0.73726 0.85552-0.32585-0.28620 0.59182
   0   7  -3  993.15 1458.20   1 0.98013-0.67469-0.01032 0.53936 0.19805-0.50386
  -7   7   3  395.95 1163.53   1 0.17864-0.48387 0.83957-0.31091-0.51302 0.81804
  -7   0  -4108819.3 6181.29   1-0.16254-0.45002 0.89294-0.89294-0.41980 0.01156
   0   7  -4117221.0 6652.24   1 0.98399-0.67854 0.06851 0.46052 0.16452-0.57226
  -7   7   4109838.417226.59   1 0.09670-0.40193 0.89681-0.36815-0.43170 0.83840
  -7   0  -5  929.67 1582.36   1-0.16862-0.44394 0.89153-0.89153-0.42039-0.08989
   0   7  -5 -139.58 1386.82   1 0.97991-0.67446 0.15424 0.37479 0.12642-0.63609
  -7   7   5   -3.86 1198.36   1 0.01543-0.32066 0.93821-0.40955-0.34570 0.85407
  -7   0  -6 3640.81 1730.76   1-0.19013-0.42242 0.88626-0.88626-0.42236-0.18998
   0   7  -6 2182.61 1865.80   1 0.96572-0.66028 0.24562 0.28341 0.08387-0.69548
  -7   7   6  753.10 1355.03   1-0.06444-0.24047 0.96429-0.43614-0.25688 0.86714
  -7  -1  -6 1698.25 1098.08   1-0.31549-0.34066 0.84637-0.92214-0.42907-0.18328
  -1   8  -6  966.21 1374.01   1 0.94916-0.68735 0.31037 0.29423 0.05243-0.66404
  -8   7   6  -69.52 1286.19   1-0.08482-0.30722 0.96870-0.44056-0.23325 0.84351
  -7  -1  -5  603.59  870.07   1-0.29627-0.35988 0.85362-0.92939-0.42841-0.08188
  -1   8  -5  839.47 2012.46   1 0.96871-0.70691 0.23093 0.37368 0.09085-0.60053
  -8   7   5 -272.69 1277.98   1-0.01202-0.38040 0.94885-0.42019-0.31547 0.82384
  -7  -1  -461420.39 5645.50   1-0.29177-0.36438 0.85526-0.93103-0.42823 0.01999
  -1   8  -461845.39 5150.06   1 0.97965-0.71785 0.15675 0.44785 0.12528-0.53302
  -8   7   461693.7214222.25   1 0.06177-0.45420 0.91643-0.38777-0.39537 0.80207
  -7  -1  -3 1906.28 1822.70   1-0.30219-0.35396 0.85143-0.92720-0.42863 0.12245
  -8   7   3 1029.01  918.93   1 0.27912-0.67230 0.89972-0.37005-0.33552 0.64114
  -1   8  -3 1491.54 2024.73   1 0.98380-0.72199 0.08901 0.51560 0.15557-0.46137
  -8   7   3 1994.40 1103.34   1 0.13622-0.52865 0.87121-0.34255-0.47162 0.77664
  -7  -1  -2 1243.11  893.06   1-0.32779-0.32836 0.84152-0.91729-0.42940 0.22528
  -8   7   2 1271.17 1070.72   1 0.40593-0.79911 0.86487-0.33520-0.29531 0.49905
  -1   8  -2 1582.13 1844.90   1 0.98295-0.72115 0.02894 0.57567 0.18153-0.38540
  -7  -1  -1 2186.89 1345.47   1-0.36867-0.28748 0.82414-0.89990-0.42996 0.32790
  -8   7   1 -119.80 1055.76   1 0.48624-0.87942 0.83254-0.30287-0.26539 0.36726
  -1   8  -1  538.22 1691.55   1 0.97894-0.71713-0.02209 0.62671 0.20294-0.30487
  -7  -1   0100573.615909.04   1-0.42450-0.23165 0.79717-0.87293-0.42931 0.42931
  -8   7   0101575.2 5445.69   1 0.53544-0.92861 0.80822-0.27855-0.24509 0.24509
  -1   8   0108768.0 6187.70   1 0.97360-0.71179-0.06259 0.66720 0.21950-0.21950
  -7  -1   1 1164.24 1610.15   1-0.49416-0.16199 0.75781-0.83358-0.42604 0.52811
  -8   7  -1 1002.45 1631.97   1 0.56247-0.95565 0.79323-0.26356-0.23324 0.13136
  -1   8   1   18.46 1208.71   1 0.96874-0.70694-0.09081 0.69542 0.23081-0.12888
  -7  -1   2 2586.78 1738.31   1-0.57547-0.08068 0.70275-0.77852-0.41828 0.62240
  -8   7  -2  768.96 1911.41   1 0.57277-0.96595 0.78719-0.25752-0.22858 0.02483
  -1   8   2  625.99 1152.62   1 0.96603-0.70422-0.10461 0.70923 0.23628-0.03241
  -7  -1   3 1192.16 1327.77   1-0.66486 0.00870 0.62843-0.70420-0.40376 0.70994
  -8   7  -3  972.24 1476.52   1 0.56963-0.96280 0.78905-0.25938-0.23001-0.07560
  -1   8   3 1252.64 1201.01   1 0.96674-0.70494-0.10109 0.70571 0.23489 0.07090
  -7  -1   465306.83 9007.11   1-0.75694 0.10120 0.53141-0.60713-0.38030 0.78812
  -8   7  -470096.01 5941.78   1 0.55500-0.94818 0.79749-0.26782-0.23657-0.17091
  -7  -1   5  755.63 1019.78   1-0.84528 0.18955 0.40851-0.48423-0.34438 0.85415
  -8   7  -5 1026.11 1851.80   1 0.52995-0.92313 0.81112-0.28145-0.24744-0.26192
  -8   7  -6 1067.06 1345.19   1 0.49489-0.88807 0.82853-0.29886-0.26193-0.34929
  -6  -2  -612278.60 4228.78   1-0.40147-0.21093 0.80876-0.96029-0.42978-0.18257
  -2   8  -617170.31 3341.55   1 0.92249-0.74792 0.38571 0.21900 0.01513-0.62660
  -8   6   614944.73 4885.57   1-0.12599-0.30961 0.97472-0.52203-0.18448 0.79474
  -6  -2  -5 6582.26 2642.56   1-0.38174-0.23067 0.81817-0.96970-0.42995-0.08034
  -2   8  -5 6164.11 2439.11   1 0.94868-0.77414 0.31199 0.29262 0.05163-0.56131
  -8   6   5 8242.89 3273.94   1-0.05799-0.37761 0.96269-0.50999-0.26430 0.77285
  -6  -2  -412604.72 5333.64   1-0.37735-0.23506 0.82020-0.97173-0.42997 0.02172
  -2   8  -411747.08 2659.64   1 0.96620-0.79167 0.24335 0.36125 0.08495-0.49269
  -8   6   413213.80 4068.66   1 0.01298-0.44902 0.93923-0.48609-0.34303 0.74972
  -6  -2  -317687.70 6985.71   1-0.38824-0.22417 0.81512-0.96666-0.42992 0.12374
  -8   6   317067.94 5856.80   1 0.13162-0.56917 0.91856-0.46385-0.37270 0.67888
  -2   8  -314678.30 3065.26   1 0.97687-0.80233 0.18066 0.42395 0.11433-0.42013
  -8   6   321825.50 7941.32   1 0.08518-0.52122 0.90359-0.45045-0.41983 0.72485
  -6  -2  -262093.72 8008.67   1-0.41433-0.19808 0.80237-0.95390-0.42956 0.22544
  -8   6   266413.54 4315.05   1 0.27686-0.71373 0.90018-0.44618-0.33616 0.53991
  -2   8  -263285.13 5207.07   1 0.98226-0.80772 0.12534 0.47927 0.13946-0.34333
  -8   6   264065.9214973.03   1 0.15811-0.59414 0.85544-0.40230-0.49317 0.69652
  -6  -2  -121720.85 8564.52   1-0.45524-0.15716 0.78061-0.93215-0.42823 0.32617
  -8   6   126094.97 3169.60   1 0.37250-0.80937 0.87588-0.42188-0.30670 0.40857
  -2   8  -125662.52 3555.03   1 0.98395-0.80942 0.07901 0.52560 0.15994-0.26188
  -6  -2   023535.00 5903.33   1-0.51001-0.10240 0.74790-0.89943-0.42488 0.42488
  -8   6   019196.60 2860.54   1 0.43381-0.87067 0.85462-0.40062-0.28534 0.28534
  -2   8   018875.98 3194.95   1 0.98355-0.80901 0.04357 0.56104 0.17528-0.17528
  -6  -2   127114.73 9277.14   1-0.57678-0.03563 0.70178-0.85331-0.41811 0.52017
  -8   6  -122137.04 3168.00   1 0.46992-0.90679 0.83982-0.38582-0.27177 0.16990
  -2   8   125988.64 3283.21   1 0.98255-0.80801 0.02130 0.58331 0.18477-0.08283
  -6  -2   267294.4616557.40   1-0.65261 0.04020 0.63961-0.79114-0.40618 0.61030
  -8   6  -266393.50 5416.09   1 0.48677-0.92364 0.83230-0.37829-0.26517 0.06143
  -2   8   264153.07 4626.84   1 0.98217-0.80763 0.01516 0.58945 0.18737 0.01650
  -6  -2   319933.74 6010.28   1-0.73313 0.12111 0.55887-0.71030-0.38752 0.69339
  -8   6  -317975.15 3309.69   1 0.48817-0.92503 0.83166-0.37765-0.26462-0.04099
  -2   8   318850.30 2743.64   1 0.98297-0.80844 0.02934 0.57527 0.18136 0.12444
  -6  -2   411421.84 4106.07   1-0.81331 0.20129 0.45757-0.60901-0.35937 0.76719
  -8   6  -4 8840.49 2800.53   1 0.47650-0.91336 0.83693-0.38293-0.26922-0.13826
  -6  -2   5 8655.10 3043.11   1-0.88645 0.27443 0.33415-0.48558-0.32021 0.82999
  -8   6  -510904.56 2745.86   1 0.45317-0.89004 0.84690-0.39290-0.27816-0.23119
  -8   6  -619085.40 3623.05   1 0.41885-0.85571 0.86024-0.40624-0.29074-0.32048
  -5  -3  -623478.13 9180.90   1-0.50220-0.06646 0.75283-0.98013-0.42548-0.18688
  -3   8  -629440.28 3918.03   1 0.88562-0.79834 0.46366 0.14105-0.02602-0.58544
  -8   5   631094.5412120.36   1-0.17168-0.30748 0.97670-0.59946-0.12872 0.73898
  -5  -3  -518656.39 7051.73   1-0.48161-0.08705 0.76540-0.99270-0.42685-0.08344
  -3   8  -521322.85 3586.18   1 0.91723-0.82995 0.39824 0.20647 0.00865-0.51821
  -8   5   524562.96 8584.00   1-0.10920-0.36996 0.97274-0.59550-0.20454 0.71309
  -5  -3  -4 2069.02 2018.43   1-0.47674-0.09192 0.76828-0.99558-0.42714 0.01889
  -3   8  -4 2019.49 1608.77   1 0.94061-0.85332 0.33713 0.26757 0.03982-0.44747
  -8   5   4 2038.76 2691.72   1-0.04392-0.43524 0.95888-0.58164-0.28036 0.68720
  -5  -3  -338593.3611684.09   1-0.48715-0.08151 0.76208-0.98938-0.42651 0.12032
  -8   5   332120.74 5283.75   1-0.02203-0.45926 0.91547-0.53654-0.40177 0.70795
  -3   8  -334841.96 3786.60   1 0.95725-0.86998 0.28146 0.32315 0.06661-0.37241
  -8   5   338035.96 8732.14   1 0.02427-0.50390 0.93443-0.55681-0.35530 0.66032
  -5  -3  -2102284.411469.55   1-0.51230-0.05636 0.74643-0.97373-0.42470 0.22058
  -8   5   297938.6911523.62   1 0.13204-0.61334 0.91854-0.53961-0.37261 0.57673
  -3   8  -2105679.0 6015.36   1 0.96822-0.88095 0.23345 0.37115 0.08965-0.29353
  -8   5   2103929.5 7104.44   1 0.09395-0.57359 0.89846-0.52084-0.42887 0.63222
  -5  -3  -172396.7214187.81   1-0.55125-0.01742 0.72028-0.94758-0.42108 0.31902
  -8   5   174358.82 5392.10   1 0.24051-0.72106 0.90679-0.52846-0.34622 0.44810
  -3   8  -179086.03 5059.87   1 0.97492-0.88765 0.19466 0.40995 0.10785-0.20979
  -8   5   180139.91 6441.56   1 0.16454-0.64418 0.85058-0.47296-0.49943 0.60110
  -5  -3   0 1886.12 1763.41   1-0.60238 0.03371 0.68206-0.90936-0.41463 0.41463
  -8   5   0 1910.46 1964.16   1 0.31319-0.79374 0.89216-0.51383-0.32550 0.32550
  -3   8   0 1463.36 1358.97   1 0.97850-0.89124 0.16737 0.43724 0.12043-0.12043
  -5  -3   174595.89 7114.08   1-0.66323 0.09456 0.62994-0.85724-0.40409 0.50615
  -8   5  -177808.11 5500.50   1 0.35879-0.83934 0.88000-0.50167-0.31120 0.20933
  -3   8   169261.41 4263.01   1 0.97988-0.89261 0.15446 0.45014 0.12632-0.02438
  -5  -3   299852.66 8827.84   1-0.73017 0.16187 0.56215-0.78930-0.38836 0.59227
  -8   5  -2103451.0 6000.51   1 0.38308-0.86363 0.87254-0.49421-0.30316 0.09941
  -3   8   299959.48 5083.76   1 0.97933-0.89206 0.15985 0.44476 0.12387 0.07999
  -5  -3   336490.9312490.75   1-0.79921 0.23091 0.47737-0.70453-0.36518 0.67105
  -8   5  -331124.99 4232.09   1 0.39006-0.87061 0.87027-0.49193-0.30079-0.00482
  -3   8   340894.06 3253.19   1 0.97569-0.88843 0.18930 0.41531 0.11034 0.19546
  -5  -3   4  887.85 1122.59   1-0.86504 0.29674 0.37470-0.60186-0.33360 0.74142
  -8   5  -4 1944.97 1929.79   1 0.38241-0.86296 0.87276-0.49442-0.30338-0.10410
  -5  -3   524753.58 3387.48   1-0.92196 0.35366 0.25393-0.48108-0.29239 0.80217
  -8   5  -524558.43 3545.51   1 0.36180-0.84235 0.87912-0.50078-0.31022-0.19913
  -3   8   520475.23 6296.42   1 0.11561-0.02841 0.88502-0.28083-0.45096 0.95933
  -8   5  -630496.72 3862.51   1 0.32913-0.80968 0.88818-0.50984-0.32061-0.29061
  -4   8  -628407.16 4367.81   1 0.83786-0.83786 0.54145 0.06326-0.06927-0.54219
  -8   4   624317.53 6889.35   1-0.22082-0.30190 0.97302-0.67123-0.06671 0.67697
  -4  -4  -5 1609.63 1199.59   1-0.59197 0.06704 0.69022-0.99329-0.41611-0.09418
  -4   8  -5  349.48 1630.57   1 0.87357-0.87357 0.48521 0.11950-0.03777-0.47178
  -8   4   5 1534.73 1278.96   1-0.16509-0.35762 0.97673-0.67493-0.13686 0.64541
  -4  -4  -4 2558.00 1643.14   1-0.58570 0.06077 0.69504-0.99811-0.41696 0.00872
  -4   8  -4 3033.56 1936.53   1 0.90123-0.90123 0.43321 0.17150-0.00970-0.39793
  -8   4   4 5034.97 2515.81   1-0.10680-0.41592 0.97241-0.67061-0.20739 0.61423
  -4  -4  -3  916.17 1177.12   1-0.59421 0.06928 0.68848-0.99155-0.41580 0.10962
  -8   4   3  292.30  536.94   1-0.16998-0.35506 0.89121-0.58807-0.42052 0.72670
  -4   8  -3  587.45 1866.45   1 0.92197-0.92197 0.38697 0.21774 0.01448-0.32022
  -8   4   3 1557.40 1953.54   1-0.04592-0.47680 0.95945-0.65766-0.27808 0.58321
  -4  -4  -280849.2511992.41   1-0.61646 0.09153 0.67068-0.97375-0.41249 0.20837
  -8   4   278531.52 6734.79   1-0.01675-0.50830 0.91595-0.61281-0.40093 0.60505
  -4   8  -284281.17 6156.22   1 0.93677-0.93677 0.34824 0.25646 0.03423-0.23806
  -8   4   287148.17 7138.26   1 0.01756-0.54080 0.93732-0.63522-0.34802 0.55137
  -4  -4  -1  621.98 1667.86   1-0.65097 0.12604 0.64108-0.94415-0.40649 0.30443
  -8   4   1  611.37 1092.21   1 0.09723-0.62228 0.91983-0.61669-0.38006 0.48212
  -4   8  -1  811.16 2807.95   1 0.94644-0.94644 0.31916 0.28555 0.04878-0.15069
  -8   4   1  794.37 1239.05   1 0.08271-0.60595 0.90500-0.60291-0.41727 0.51894
  -4  -4   011237.04 4327.49   1-0.69563 0.17070 0.59874-0.90180-0.39698 0.39698
  -8   4   012456.37 5649.50   1 0.17824-0.70329 0.91500-0.61186-0.36193 0.36193
  -4   8   0 8791.69 2041.97   1 0.95153-0.95153 0.30230 0.30230 0.05641-0.05641
  -8   4   014730.47 3994.27   1 0.14895-0.67219 0.86218-0.56009-0.48420 0.48420
  -4  -4   1  374.09 1386.78   1-0.74741 0.22283 0.54263-0.84550-0.38329 0.48525
  -8   4  -1  567.99 1566.57   1 0.23209-0.75714 0.90818-0.60504-0.34832 0.24626
  -4   8   1 2129.84 1192.01   1 0.95182-0.95182 0.30130 0.30330 0.05690 0.04502
  -4  -4   288345.7217121.32   1-0.80316 0.27857 0.47193-0.77480-0.36360 0.56751
  -8   4  -280046.07 5439.26   1 0.26411-0.78835 0.90266-0.59999-0.33976 0.13602
  -4   8   278445.15 4190.46   1 0.94598-0.94598 0.32072 0.28388 0.04730 0.15656
  -4  -4   3 1297.10 1540.05   1-0.85853 0.33394 0.38619-0.68906-0.33730 0.64317
  -8   4  -3 1180.43 1759.21   1 0.27706-0.80130 0.90014-0.59747-0.33611 0.03049
  -4   8   3  509.61  733.77   1 0.92981-0.92981 0.36719 0.23752 0.02463 0.28110
  -4  -4   4 3467.25 1851.97   1-0.90904 0.38445 0.28547-0.58834-0.30354 0.71136
  -8   4  -4 3264.53 2039.62   1 0.27409-0.79833 0.90073-0.59807-0.33695-0.07053
  -8   4  -5 1122.20 1818.82   1 0.25700-0.78124 0.90397-0.60130-0.34173-0.16762
   4   4  -5 -126.63 1422.48   1 0.95004-0.42643-0.17015 0.47246 0.26164-0.77131
  -4   8   5 1230.64  951.34   1 0.10864-0.10864 0.88946-0.28528-0.44389 0.95226
  -8   4  -626877.48 9247.30   1 0.22590-0.75095 0.90912-0.60598-0.34995-0.26239
   4   4  -622994.87 3018.52   1 0.97661-0.45300-0.04151 0.34382 0.21092-0.82253
  -4   8   619879.87 5294.31   1 0.00157-0.00157 0.94379-0.33961-0.33052 0.94056
  -5   8  -628909.82 4370.36   1 0.77963-0.86692 0.61592-0.01120-0.11315-0.49831
  -8   3   625791.60 7668.82   1-0.27212-0.29416 0.96226-0.73591 0.00042 0.60983
  -3  -5  -517933.99 6270.66   1-0.70538 0.22420 0.58881-0.96765-0.39461-0.11568
  -5   8  -523015.37 4072.17   1 0.81762-0.90490 0.56938 0.03533-0.08541-0.42414
  -8   3   524042.83 8080.19   1-0.22411-0.34217 0.97255-0.74621-0.06248 0.57104
  -3  -5  -4 2089.04 1300.58   1-0.69679 0.21560 0.59757-0.97641-0.39671-0.01152
  -8   3   4 1298.83  831.55   1-0.47563-0.09303 0.76894-0.54163-0.42720 0.83544
  -5   8  -4 1213.58 1054.63   1 0.84755-0.93484 0.52716 0.07754-0.06115-0.34649
  -8   3   4 3118.61 2039.02   1-0.17429-0.39199 0.97666-0.75031-0.12547 0.53231
  -3  -5  -334364.2210142.60   1-0.70188 0.22070 0.59241-0.97124-0.39548 0.08930
  -8   3   331880.92 9176.06   1-0.30274-0.26593 0.85123-0.62393-0.42865 0.73483
  -5   8  -333264.05 3801.05   1 0.87026-0.95754 0.49088 0.11383-0.04089-0.26484
  -8   3   342728.23 9245.77   1-0.12267-0.44361 0.97438-0.74803-0.18846 0.49359
  -3  -5  -295581.49 8652.70   1-0.71891 0.23804 0.57438-0.95297-0.39145 0.18754
  -8   3   295224.89 8096.97   1-0.15985-0.40894 0.89355-0.66619-0.41953 0.62365
  -5   8  -2105734.7 6274.97   1 0.88631-0.97359 0.46239 0.14232-0.02533-0.17848
  -8   3   2113342.0 8368.46   1-0.06929-0.49698 0.96542-0.73908-0.25128 0.45471
  -3  -5  -174247.8414388.46   1-0.74676 0.26589 0.54338-0.92197-0.38349 0.28153
  -8   3   178298.53 5349.84   1-0.04688-0.52191 0.91286-0.68550-0.40556 0.50762
  -5   8  -177728.39 5329.02   1 0.89591-0.98319 0.44395 0.16075-0.01542-0.08648
  -8   3   175366.89 5815.90   1-0.01435-0.55249 0.94968-0.72311-0.31288 0.41456
  -3  -5   0  763.05 1508.30   1-0.78266 0.30179 0.49942-0.87801-0.37149 0.37149
  -8   3   0 1632.70 1830.00   1 0.03762-0.60643 0.91934-0.69199-0.39164 0.39164
  -5   8   0  810.70 1285.64   1 0.89870-0.98598 0.43837 0.16634-0.01245 0.01245
  -8   3   0 2731.70 1638.79   1 0.04162-0.60846 0.92650-0.69993-0.37398 0.37398
  -3  -5   170930.6217463.71   1-0.82371 0.34284 0.44229-0.82088-0.35478 0.45674
  -8   3  -178471.60 6077.80   1 0.09687-0.66568 0.91984-0.69248-0.38013 0.27808
  -5   8   171933.86 4661.01   1 0.89322-0.98050 0.44924 0.15546-0.01826 0.12017
  -8   3  -175892.38 4797.51   1 0.09799-0.66484 0.89603-0.66946-0.43303 0.33135
  -3  -5   291606.46 5561.00   1-0.86659 0.38572 0.37192-0.75051-0.33269 0.53660
  -8   3  -2104277.2 8370.76   1 0.13417-0.70298 0.91842-0.69107-0.37214 0.16802
  -5   8   297028.53 4711.86   1 0.87574-0.96303 0.48144 0.12327-0.03570 0.23953
  -8   3  -2103685.6 5723.83   1 0.15341-0.72025 0.85892-0.63235-0.48857 0.28522
  -3  -5   334749.74 8317.29   1-0.90770 0.42683 0.28858-0.66717-0.30462 0.61049
  -8   3  -335769.56 4786.67   1 0.15246-0.72127 0.91723-0.68988-0.36800 0.06183
  -5   8   337302.56 2920.80   1 0.83748-0.92476 0.54201 0.06270-0.06959 0.37532
  -8   3  -4 2583.60 1428.79   1 0.15409-0.72289 0.91711-0.68976-0.36763-0.04059
  -8   3  -525725.57 8408.54   1 0.14074-0.70955 0.91803-0.69068-0.37067-0.13961
   3   5  -520203.70 3009.35   1 0.96970-0.48972-0.08565 0.46354 0.22876-0.73844
  -5   8   518292.62 7089.55   1 0.09506-0.18226 0.89780-0.29361-0.43001 0.93838
  -8   3  -627490.28 9157.36   1 0.11350-0.68231 0.91937-0.69202-0.37664-0.23570
   3   5  -624024.66 3552.74   1 0.98309-0.50311 0.03183 0.34604 0.18030-0.79191
  -5   8   621746.06 8534.20   1-0.00240-0.08480 0.94531-0.34113-0.32613 0.93618
  -6   8  -620906.91 3833.39   1 0.71223-0.88679 0.68433-0.07962-0.15622-0.45524
  -2  -6  -5 9064.81 3442.90   1-0.81081 0.37365 0.46116-0.91546-0.36043-0.14933
  -6   8  -5 7466.03 2331.65   1 0.75065-0.92521 0.64727-0.04255-0.13251-0.37704
  -8   2   510277.26 5496.22   1-0.28438-0.32546 0.95856-0.80766 0.01686 0.49168
  -2  -6  -411214.81 3836.34   1-0.79974 0.36258 0.47666-0.93096-0.36498-0.04283
  -8   2   4 9471.46 2757.24   1-0.56489-0.04752 0.71053-0.55900-0.41955 0.82780
  -6   8  -412479.05 3072.52   1 0.78078-0.95535 0.61460-0.00989-0.11235-0.29529
  -8   2   410409.52 4749.80   1-0.24399-0.36584 0.96908-0.81818-0.03670 0.44354
  -2  -6  -316591.51 6650.77   1-0.80062 0.36346 0.47544-0.92975-0.36462 0.05876
  -8   2   317252.67 5062.86   1-0.41815-0.19425 0.80043-0.64889-0.42947 0.73565
  -6   8  -317242.58 3177.45   1 0.80312-0.97769 0.58796 0.01675-0.09636-0.20937
  -8   2   319266.26 6532.60   1-0.20325-0.40659 0.97505-0.82416-0.08913 0.39426
  -2  -6  -257238.21 8279.95   1-0.81191 0.37475 0.45958-0.91389-0.35997 0.15606
  -8   2   251058.07 7528.47   1-0.28988-0.32253 0.85594-0.70441-0.42815 0.63227
  -6   8  -272476.09 5891.92   1 0.81775-0.99231 0.56921 0.03550-0.08531-0.11850
  -8   2   261380.71 4456.64   1-0.16254-0.44730 0.97671-0.82581-0.14001 0.34343
  -2  -6  -126289.93 8273.03   1-0.83168 0.39452 0.43015-0.88446-0.35109 0.24913
  -8   2   129166.62 8697.28   1-0.18414-0.42841 0.88777-0.73620-0.42183 0.52389
  -6   8  -123692.28 3413.62   1 0.82422-0.99878 0.56054 0.04417-0.08027-0.02164
  -8   2   123707.63 8040.26   1-0.12245-0.48739 0.97436-0.82346-0.18872 0.29043
  -2  -6   019279.58 6658.65   1-0.85762 0.42046 0.38776-0.84207-0.33780 0.33780
  -8   2   024496.79 7653.02   1-0.10106-0.51149 0.90513-0.75356-0.41293 0.41293
  -6   8   020956.71 2904.04   1 0.82120-0.99577 0.56461 0.04010-0.08263 0.08263
  -8   2   020826.23 4821.31   1-0.08394-0.52590 0.96853-0.81763-0.23428 0.23428
  -2  -6   124161.47 6366.92   1-0.88707 0.44992 0.33290-0.78720-0.31979 0.42175
  -8   2  -127176.02 8498.88   1-0.04006-0.57249 0.91363-0.76206-0.40454 0.30248
  -6   8   123677.15 2707.34   1 0.80576-0.98033 0.58465 0.02006-0.09439 0.19631
  -8   2  -121345.91 2210.21   1-0.04861-0.56123 0.96020-0.80930-0.27502 0.17331
  -2  -6   257300.85 4582.28   1-0.91714 0.47998 0.26609-0.72040-0.29672 0.50063
  -8   2  -260311.82 5173.64   1 0.00059-0.61316 0.91733-0.76576-0.39810 0.19399
  -6   8   263062.82 4353.70   1 0.77185-0.94642 0.62465-0.01994-0.11849 0.32231
  -8   2  -251410.48 2787.25   1-0.02025-0.59019 0.95171-0.80067-0.30630 0.10295
  -8   2  -318898.34 5846.65   1 0.02284-0.63541 0.91870-0.76713-0.39429 0.08811
  -6   8   319371.82 2016.75   1 0.70650-0.88107 0.68947-0.08476-0.15959 0.46532
  -8   2  -412134.86 5143.20   1 0.02843-0.64099 0.91896-0.76739-0.39330-0.01492
   2   6  -410249.05 3155.75   1 0.96701-0.53066-0.09978 0.55324 0.23437-0.64211
  -6   8   411249.64 4991.19   1 0.16616-0.34057 0.84934-0.24516-0.50099 0.90769
  -8   2  -510942.10 4185.36   1 0.01874-0.63131 0.91848-0.76691-0.39501-0.11527
   2   6  -5 7601.77 2389.41   1 0.98088-0.54453-0.00203 0.45549 0.19459-0.70427
  -6   8   5 7572.29 4414.67   1 0.07627-0.25069 0.90862-0.30444-0.41057 0.91894
  -8   2  -615724.73 7213.33   1-0.00528-0.60727 0.91690-0.76533-0.39908-0.21326
   2   6  -613321.44 2942.67   1 0.98336-0.54701 0.10387 0.34958 0.14901-0.76062
  -6   8   610498.81 6136.87   1-0.01284-0.16156 0.94915-0.34496-0.31456 0.92460
  -7   8  -6 1428.84 1905.36   1 0.63747-0.89959 0.74476-0.13942-0.19736-0.41387
  -7   8  -5  875.17 1286.68   1 0.67471-0.93683 0.71637-0.11104-0.17767-0.33169
  -1  -7  -453704.9812891.30   1-0.88541 0.49197 0.33624-0.86626-0.32091-0.08690
  -8   1   454081.34 8851.06   1-0.63849-0.01766 0.65208-0.57631-0.40879 0.81703
  -7   8  -463252.66 5330.06   1 0.70339-0.96524 0.69222-0.08751-0.16140-0.24624
  -8   1   461495.2115225.64   1-0.31325-0.34015 0.94800-0.87255 0.05621 0.35062
  -1  -7  -3  843.35 1309.25   1-0.88245 0.48901 0.34208-0.87210-0.32287 0.01700
  -8   1   3 1570.20 1202.96   1-0.51601-0.14014 0.74404-0.66828-0.42440 0.73058
  -7   8  -3 1799.03 2060.74   1 0.72343-0.98528 0.67400-0.06928-0.14951-0.15622
  -8   1   3  626.00  974.59   1-0.28398-0.36942 0.95869-0.88324 0.01632 0.28880
  -1  -7  -2 2050.76 1622.78   1-0.88773 0.49429 0.33157-0.86159-0.31935 0.11544
  -8   1   2  775.01  802.48   1-0.40468-0.25147 0.80718-0.73142-0.42973 0.63386
  -7   8  -2 2584.80 2950.27   1 0.73455-0.99640 0.66337-0.05865-0.14269-0.06112
  -8   1   2  283.83  624.82   1-0.25719-0.39621 0.96616-0.89071-0.01938 0.22280
  -1  -7  -1  488.33 1094.40   1-0.89958 0.50614 0.30673-0.83675-0.31090 0.20894
  -8   1   1 1284.98 1143.41   1-0.30908-0.34707 0.84884-0.77307-0.42887 0.53093
  -7   8  -1 1602.84 2233.06   1 0.73568-0.99753 0.66227-0.05755-0.14199 0.04008
  -8   1   1  160.35  435.50   1-0.23450-0.41890 0.97087-0.89542-0.04905 0.15077
  -1  -7   098594.8013484.24   1-0.91599 0.52255 0.26891-0.79893-0.29772 0.29772
  -8   1   0106727.314297.06   1-0.23151-0.42479 0.87480-0.79901-0.42557 0.42557
  -7   8   0104324.9 6186.48   1 0.72467-0.98652 0.67284-0.06812-0.14876 0.14876
  -8   1   084745.06 6515.09   1-0.21867-0.43473 0.97332-0.89787-0.06947 0.06947
  -1  -7   1 1554.94 2407.83   1-0.93470 0.54126 0.21916-0.74919-0.27981 0.38176
  -8   1  -1  689.92 1502.87   1-0.17219-0.48412 0.89069-0.81490-0.42073 0.31867
  -7   8   1  559.26 1492.89   1 0.69744-0.95929 0.69742-0.09270-0.16483 0.26674
  -8   1  -1  171.34  416.44   1-0.21498-0.43842 0.97379-0.89834-0.07420-0.02750
  -8   1  -2  318.32 1307.60   1-0.13086-0.52544 0.89968-0.82390-0.41646 0.21234
  -7   8   2  957.28 1255.36   1 0.64615-0.90827 0.73842-0.13308-0.19289 0.39663
   1   7  -2 2300.42 2589.67   1 0.95318-0.56047-0.15883 0.68787 0.25733-0.46120
  -8   1  -3  798.76  731.68   1-0.10659-0.54972 0.90419-0.82840-0.41361 0.10743
  -7   8   3  382.11  721.57   1 0.55651-0.81862 0.79664-0.19130-0.23590 0.54152
   1   7  -3 1192.84 1484.32   1 0.96926-0.57655-0.08804 0.61708 0.22971-0.53552
  -8   1  -460597.6812272.47   1-0.09829-0.55802 0.90560-0.82981-0.41258 0.00434
   1   7  -460048.68 4810.85   1 0.98032-0.58761-0.00830 0.53734 0.19721-0.60495
  -7   8   459219.45 8489.21   1 0.13575-0.39737 0.87154-0.26735-0.47115 0.87784
  -8   1  -5  532.67 1057.35   1-0.10503-0.55128 0.90446-0.82867-0.41342-0.09686
   1   7  -5 -105.42 1431.86   1 0.98395-0.59124 0.07934 0.44969 0.15980-0.66948
  -7   8   5  616.66  971.79   1 0.05327-0.31489 0.92079-0.31660-0.38639 0.89476
  -8   1  -6  764.87  813.36   1-0.12614-0.53017 0.90060-0.82482-0.41592-0.19642
   1   7  -6  599.71 1269.65   1 0.97774-0.58503 0.17383 0.35520 0.11747-0.72908
  -7   8   6  736.33  839.87   1-0.02843-0.23318 0.95441-0.35022-0.29713 0.90717
  -8   8  -5  407.93 1401.26   1 0.59238-0.94187 0.77518-0.16984-0.21948-0.28987
  -8   0   463065.27 8775.08   1-0.69996 0.00005 0.59436-0.59436-0.39595 0.80419
  -8   8  -467948.14 5458.48   1 0.61820-0.96769 0.75826-0.15292-0.20703-0.20045
  -8   0   3  944.72 1172.17   1-0.59855-0.10135 0.68508-0.68508-0.41519 0.72137
  -8   8  -3 1382.81 1983.02   1 0.63467-0.98416 0.74677-0.14143-0.19878-0.10682
  -8   0   2 6196.11 2707.65   1-0.50377-0.19613 0.75184-0.75184-0.42536 0.62948
  -8   8  -2 4651.43 2031.69   1 0.64107-0.99056 0.74215-0.13682-0.19552-0.00822
  -8   0   1 1688.53 1950.95   1-0.42001-0.27989 0.79948-0.79948-0.42943 0.53149
  -8   8  -1  967.97 1464.11   1 0.63588-0.98537 0.74590-0.14057-0.19817 0.09630
  -8   0   0117410.5 7772.41   1-0.34995-0.34995 0.83234-0.83234-0.42981 0.42981
  -8   8   0116643.0 5926.06   1 0.61643-0.96593 0.75945-0.15412-0.20790 0.20790
   0   8   0132732.4 6394.28   1 0.95583-0.60675-0.14877 0.75338 0.25347-0.25347
  -8   0  -1  894.76 1136.65   1-0.29492-0.40497 0.85412-0.85412-0.42836 0.32630
  -8   8   1 1612.55 1234.44   1 0.57814-0.92763 0.78397-0.17863-0.22612 0.32799
   0   8  -1 1231.97 1770.98   1 0.96575-0.61667-0.10598 0.71059 0.23682-0.33876
  -8   0  -2 3514.69 1319.06   1-0.25527-0.44480 0.86743-0.86743-0.42707 0.22296
  -8   8   2 5809.28 1693.62   1 0.51307-0.86256 0.81973-0.21440-0.25452 0.45826
   0   8  -2 2433.92 1592.64   1 0.97506-0.62598-0.05282 0.65744 0.21554-0.41941
  -8   0  -3 1249.48 1207.56   1-0.23088-0.46919 0.87499-0.87499-0.42553 0.11936
   0   8  -3 1059.76 2139.73   1 0.98178-0.63271 0.00954 0.59507 0.18973-0.49554
  -8   8   3  675.77 1069.24   1 0.17738-0.52621 0.84058-0.23639-0.51181 0.81683
  -8   0  -465328.81 6229.82   1-0.22131-0.47875 0.87779-0.87779-0.42485 0.01662
   0   8  -476316.28 6215.05   1 0.98394-0.63487 0.08004 0.52457 0.15949-0.56724
  -8   8   459308.1610950.74   1 0.10242-0.45125 0.89333-0.28915-0.43755 0.84425
  -8   0  -5 1372.22  911.66   1-0.22608-0.47399 0.87640-0.87640-0.42519-0.08509
   0   8  -5  471.99 1464.59   1 0.97957-0.63049 0.15762 0.44699 0.12488-0.63456
  -8   8   5  485.50  972.39   1 0.02675-0.37558 0.93333-0.32915-0.35799 0.86636
  -8  -1  -5 1800.61 1241.97   1-0.34110-0.40254 0.83607-0.91184-0.42967-0.08062
  -1   9  -5 1337.61 2048.44   1 0.96844-0.66300 0.23233 0.44786 0.09019-0.59987
  -9   8   5 1499.91 1442.38   1-0.00273-0.43330 0.94544-0.34125-0.32577 0.83414
  -8  -1  -413113.36 5301.82   1-0.33724-0.40640 0.83767-0.91344-0.42960 0.02136
  -1   9  -4 9638.15 3057.56   1 0.97885-0.67340 0.16435 0.51583 0.12181-0.52955
  -9   8   412179.63 4090.15   1 0.06657-0.50261 0.91390-0.30971-0.40043 0.80712
  -8  -1  -3 1887.41 1844.30   1-0.34671-0.39693 0.83372-0.90948-0.42976 0.12358
  -1   9  -3 3863.61 2380.85   1 0.98339-0.67795 0.10299 0.57719 0.14940-0.45521
  -9   8   3 3407.96 1643.31   1 0.13537-0.57141 0.87180-0.26761-0.47077 0.77580
  -8  -1  -212665.24 5191.57   1-0.36960-0.37404 0.82372-0.89949-0.42996 0.22584
  -9   8   216214.70 2569.94   1 0.38248-0.81935 0.87273-0.26740-0.30336 0.50710
  -1   9  -211190.76 2433.19   1 0.98371-0.67827 0.04929 0.63090 0.17283-0.37670
  -8  -1  -1 3816.38 1885.40   1-0.40589-0.33775 0.80659-0.88236-0.42972 0.32765
  -9   8   1 2539.21 1504.22   1 0.45705-0.89392 0.84530-0.23996-0.27670 0.37857
  -1   9  -1 2522.03 1482.00   1 0.98140-0.67596 0.00437 0.67581 0.19191-0.29384
  -8  -1   030165.6911421.31   1-0.45521-0.28842 0.78063-0.85640-0.42823 0.42823
  -9   8   028933.46 3530.35   1 0.50412-0.94099 0.82412-0.21879-0.25819 0.25819
  -1   9   026832.00 3630.15   1 0.97799-0.67255-0.03049 0.71068 0.20640-0.20640
  -8  -1   1 2821.84 1589.53   1-0.51669-0.22695 0.74361-0.81937-0.42435 0.52641
  -9   8  -1 2560.93 1828.37   1 0.53103-0.96789 0.81055-0.20521-0.24698 0.14511
  -1   9   1 3208.02 1651.56   1 0.97491-0.66947-0.05383 0.73403 0.21595-0.11401
  -8  -1   219984.96 7330.87   1-0.58862-0.15502 0.69280-0.76857-0.41657 0.62069
  -9   8  -210613.04 2533.87   1 0.54234-0.97921 0.80450-0.19917-0.24212 0.03837
  -1   9   213368.09 2812.55   1 0.97341-0.66796-0.06382 0.74401 0.21999-0.01612
  -8  -1   3 2799.46 2005.73   1-0.66835-0.07529 0.62518-0.70094-0.40304 0.70922
  -9   8  -3 3437.79 2980.12   1 0.54092-0.97778 0.80528-0.19994-0.24273-0.06287
  -1   9   3 3047.38 1616.47   1 0.97431-0.66887-0.05793 0.73812 0.21761 0.08819
  -8  -1   410861.89 4305.13   1-0.75171 0.00855 0.53760-0.61332-0.38196 0.78978
  -9   8  -413282.32 3005.56   1 0.52849-0.96536 0.81188-0.20654-0.24806-0.15942
  -9   8  -5  820.09 1477.05   1 0.50603-0.94289 0.82320-0.21786-0.25741-0.25194
  -7  -2  -5 1128.68 1228.11   1-0.41303-0.28687 0.80302-0.95456-0.42958-0.08071
  -2   9  -5 2149.90 2122.00   1 0.95135-0.73318 0.30293 0.37726 0.05610-0.56578
  -9   7   5 3005.08 1769.64   1-0.04283-0.43633 0.95857-0.43043-0.28160 0.79015
  -7  -2  -4 5831.75 3307.86   1-0.40908-0.29081 0.80500-0.95653-0.42966 0.02142
  -2   9  -4 5276.32 1872.17   1 0.96706-0.74889 0.23921 0.44097 0.08692-0.49466
  -9   7   4 6159.60 3495.27   1 0.02460-0.50424 0.93428-0.40562-0.35567 0.76236
  -7  -2  -3 8876.82 3876.68   1-0.41869-0.28121 0.80015-0.95169-0.42946 0.12328
  -2   9  -3 6983.27 2703.67   1 0.97673-0.75856 0.18172 0.49847 0.11384-0.41965
  -9   7   3 7148.33 4713.69   1 0.09198-0.57161 0.89963-0.37097-0.42684 0.73186
  -7  -2  -221588.52 8346.70   1-0.44169-0.25821 0.78807-0.93960-0.42877 0.22465
  -9   7   227101.18 3543.09   1 0.27452-0.75507 0.90065-0.37098-0.33683 0.54057
  -2   9  -224470.90 3570.81   1 0.98183-0.76366 0.13166 0.54852 0.13662-0.34049
  -9   7   228402.65 7215.27   1 0.15874-0.63837 0.85497-0.32630-0.49378 0.69713
  -7  -2  -1 8315.29 3594.27   1-0.47773-0.22217 0.76770-0.91923-0.42708 0.32502
  -9   7   1 8147.71 1800.00   1 0.36055-0.84110 0.87949-0.34982-0.31063 0.41250
  -2   9  -1 5986.00 2349.01   1 0.98377-0.76560 0.09040 0.58979 0.15495-0.25689
  -7  -2   0 8146.87 3838.60   1-0.52602-0.17387 0.73749-0.88902-0.42354 0.42354
  -9   7   0 8882.45 2698.08   1 0.41681-0.89736 0.86099-0.33132-0.29147 0.29147
  -2   9   0 8834.17 2773.79   1 0.98391-0.76574 0.05949 0.62069 0.16843-0.16843
  -7  -2   1 8495.49 3327.42   1-0.58517-0.11472 0.69544-0.84698-0.41703 0.51909
  -9   7  -1 7330.94 2148.47   1 0.45075-0.93130 0.84790-0.31823-0.27907 0.17720
  -2   9   1 7330.68 2052.19   1 0.98346-0.76528 0.04083 0.63935 0.17645-0.07452
  -7  -2   226379.51 8781.05   1-0.65297-0.04693 0.63929-0.79082-0.40611 0.61023
  -9   7  -223945.68 3457.85   1 0.46724-0.94779 0.84098-0.31131-0.27281 0.06906
  -2   9   224189.12 3106.17   1 0.98331-0.76513 0.03684 0.64335 0.17816 0.02570
  -7  -2   3 9207.11 4007.29   1-0.72602 0.02657 0.56670-0.71814-0.38952 0.69539
  -9   7  -3 5321.71 2065.05   1 0.46947-0.95002 0.84002-0.31035-0.27195-0.03366
  -2   9   3 7765.74 1814.96   1 0.98375-0.76558 0.05089 0.62929 0.17213 0.13366
  -7  -2   4 8144.77 3952.33   1-0.80057 0.10112 0.47551-0.62695-0.36464 0.77246
  -9   7  -4 5799.09 2191.99   1 0.45948-0.94003 0.84428-0.31461-0.27577-0.13171
  -7  -2   5 1342.92 1389.61   1-0.87112 0.17167 0.36364-0.51507-0.32999 0.83977
  -9   7  -5 1397.18 1937.78   1 0.43848-0.91903 0.85280-0.32313-0.28363-0.22572
  -6  -3  -5 -207.01 1191.25   1-0.49665-0.15950 0.75628-0.98358-0.42587-0.08442
  -3   9  -5  624.78 1408.65   1 0.92507-0.79414 0.37934 0.30096 0.01841-0.52797
  -9   6   5  851.62 1345.45   1-0.08827-0.43445 0.96936-0.51666-0.22921 0.73776
  -6  -3  -4 9633.65 3945.19   1-0.49221-0.16394 0.75900-0.98630-0.42618 0.01793
  -3   9  -4 5675.02 2225.67   1 0.94573-0.81480 0.32143 0.35887 0.04765-0.45530
  -9   6   4 7941.16 4980.53   1-0.02465-0.49858 0.95318-0.50004-0.30137 0.70807
  -6  -3  -3  162.22 1274.08   1-0.50129-0.15486 0.75339-0.98069-0.42554 0.11936
  -9   6   3  482.28  577.64   1 0.01598-0.54103 0.91833-0.46362-0.39549 0.70166
  -3   9  -3  153.30 1389.85   1 0.96033-0.82943 0.26923 0.41096 0.07254-0.37834
  -9   6   3  656.88  986.24   1 0.03965-0.56289 0.92743-0.47429-0.37187 0.67689
  -6  -3  -224559.25 9124.32   1-0.52343-0.13272 0.73920-0.96650-0.42377 0.21965
  -9   6   223949.18 6714.93   1 0.15218-0.67723 0.91725-0.46254-0.36807 0.57218
  -3   9  -222741.55 3169.07   1 0.96990-0.83899 0.22470 0.45549 0.09380-0.29767
  -9   6   226688.79 7389.23   1 0.10440-0.62764 0.89211-0.43897-0.43958 0.64293
  -6  -3  -1  400.09 1136.44   1-0.55788-0.09827 0.71558-0.94288-0.42035 0.31829
  -9   6   1  596.70 1310.25   1 0.24867-0.77290 0.90543-0.45143-0.34402 0.44589
  -3   9  -1  756.83 1732.28   1 0.97572-0.84482 0.18910 0.49109 0.11043-0.21237
  -9   6   1 1557.05 1768.13   1 0.16849-0.69173 0.84755-0.39441-0.50325 0.60492
  -6  -3   018178.07 5851.70   1-0.60343-0.05272 0.68122-0.90852-0.41448 0.41448
  -9   6   013783.62 2722.10   1 0.31380-0.83804 0.89201-0.43801-0.32531 0.32531
  -3   9   016953.50 3336.79   1 0.97885-0.84795 0.16431 0.51588 0.12183-0.12183
  -6  -3   1 1117.13 1328.51   1-0.65821 0.00205 0.63454-0.86185-0.40509 0.50715
  -9   6  -1  253.08 1281.81   1 0.35513-0.87936 0.88107-0.42707-0.31239 0.21051
  -3   9   1  380.67 1287.88   1 0.98006-0.84916 0.15266 0.52753 0.12714-0.02520
  -6  -3   224104.22 7426.81   1-0.71939 0.06366 0.57387-0.80102-0.39132 0.59523
  -9   6  -218458.06 2730.93   1 0.37745-0.90169 0.87433-0.42033-0.30505 0.10130
  -3   9   222921.46 2988.38   1 0.97961-0.84870 0.15723 0.52295 0.12506 0.07880
  -6  -3   3  893.83 1400.30   1-0.78400 0.12827 0.49768-0.72484-0.37100 0.67686
  -9   6  -3  -23.56 1298.12   1 0.38410-0.90834 0.87221-0.41821-0.30281-0.00280
  -3   9   3  448.63  985.35   1 0.97664-0.84573 0.18244 0.49774 0.11351 0.19229
  -6  -3   4 7720.79 5178.48   1-0.84763 0.19190 0.40465-0.63181-0.34317 0.75099
  -9   6  -4 9919.56 3008.18   1 0.37731-0.90155 0.87438-0.42038-0.30509-0.10239
  -6  -3   5  268.25  897.56   1-0.90539 0.24966 0.29384-0.52099-0.30645 0.81622
  -9   6  -5  833.00 1339.70   1 0.35849-0.88273 0.88009-0.42609-0.31130-0.19806
  -4   9  -6  954.95 1300.00   1 0.85648-0.81283 0.51340 0.16690-0.05340-0.55806
  -9   5   6 1080.90 1608.05   1-0.19496-0.37132 0.97573-0.59849-0.09961 0.70987
  -5  -4  -5 1047.25 1190.88   1-0.58934-0.02306 0.69225-0.99532-0.41647-0.09382
  -4   9  -5 2125.28 2030.29   1 0.88858-0.84494 0.45812 0.22217-0.02303-0.48652
  -9   5   5  904.54 1526.66   1-0.13884-0.42743 0.97579-0.59854-0.16897 0.67752
  -5  -4  -433107.7410127.73   1-0.58381-0.02859 0.69648-0.99955-0.41721 0.00897
  -4   9  -433711.54 4355.88   1 0.91323-0.86958 0.40742 0.27288 0.00387-0.41151
  -9   5   439068.2814822.47   1-0.08095-0.48533 0.96794-0.59069-0.23777 0.64461
  -5  -4  -3 2592.50 2069.64   1-0.59143-0.02097 0.69064-0.99370-0.41619 0.11000
  -9   5   3 2675.65 1576.28   1-0.11482-0.45398 0.90272-0.52380-0.41460 0.72078
  -4   9  -3 2311.69 2043.02   1 0.93154-0.88790 0.36261 0.31769 0.02696-0.33269
  -9   5   3 2582.74 2058.72   1-0.02125-0.54558 0.95205-0.57443-0.30518 0.61020
  -5  -4  -2 5846.12 2230.43   1-0.61141-0.00100 0.67481-0.97788-0.41328 0.20916
  -9   5   2 7500.16 3730.78   1 0.02332-0.59213 0.91872-0.53979-0.39421 0.59832
  -4   9  -2 4493.61 2100.87   1 0.94453-0.90089 0.32521 0.35509 0.04578-0.24960
  -9   5   2 5945.74 2494.10   1 0.03912-0.60596 0.92768-0.55006-0.37130 0.57465
  -5  -4  -1  776.21  995.09   1-0.64261 0.03020 0.64848-0.95155-0.40805 0.30599
  -9   5   1  935.89 1140.98   1 0.12523-0.69404 0.91888-0.53996-0.37411 0.47617
  -4   9  -1 1856.11 1824.45   1 0.95309-0.90945 0.29685 0.38334 0.05909-0.16103
  -9   5   1 1278.84 1168.57   1 0.09984-0.66668 0.89491-0.51730-0.43491 0.53659
  -5  -4   051074.46 8329.29   1-0.68345 0.07103 0.61078-0.91384-0.39979 0.39979
  -9   5   059513.10 8078.08   1 0.19753-0.76633 0.91289-0.53397-0.35720 0.35720
  -4   9   057864.37 4654.22   1 0.95761-0.91398 0.28006 0.40012 0.06729-0.06729
  -9   5   068056.8715019.83   1 0.15981-0.72666 0.85416-0.47654-0.49483 0.49483
  -5  -4   1 1262.43 1264.18   1-0.73152 0.11951 0.56065-0.86352-0.38798 0.48993
  -9   5  -1 2763.21 2521.87   1 0.24617-0.81409 0.90585-0.52752-0.34470 0.24282
  -4   9   1 1718.77 1685.93   1 0.95830-0.91467 0.27737 0.40281 0.06859 0.03333
  -5  -4   2 5215.60 3045.45   1-0.78446 0.17244 0.49708-0.79995-0.37083 0.57474
  -9   5  -2 6801.83 3229.19   1 0.27434-0.84227 0.90068-0.52235-0.33688 0.13314
  -4   9   2 4812.32 1490.24   1 0.95431-0.91067 0.29247 0.38771 0.06124 0.14263
  -5  -4   3 1213.15 1473.18   1-0.83863 0.22662 0.41924-0.72211-0.34773 0.65359
  -9   5  -3 1814.90 1512.80   1 0.28577-0.85369 0.89835-0.52001-0.33361 0.02799
  -4   9   3 1263.13 1423.49   1 0.94287-0.89922 0.33034 0.34996 0.04322 0.26251
  -5  -4   427379.8015215.84   1-0.89015 0.27814 0.32663-0.62950-0.31768 0.72550
  -9   5  -438193.58 4719.65   1 0.28271-0.85064 0.89899-0.52065-0.33449-0.07299
  -5  -4   5 1917.77 2313.98   1-0.93472 0.32270 0.21909-0.52196-0.27978 0.78956
  -9   5  -5 -157.83 1319.09   1 0.26669-0.83461 0.90217-0.52384-0.33904-0.17031
  -4   9   5 1063.99 1234.44   1 0.13320-0.08959 0.87330-0.19359-0.46861 0.97698
  -9   5  -6 1524.78 1605.97   1 0.23857-0.80650 0.90710-0.52877-0.34674-0.26448
   5   4  -6 2053.28 1866.48   1 0.96763-0.35675-0.09662 0.39893 0.23312-0.84473
  -5   9  -6 1878.20 2137.48   1 0.80650-0.85014 0.58373 0.09657-0.09385-0.51761
  -9   4   6 2447.07 1336.15   1-0.24313-0.36671 0.96925-0.66745-0.03782 0.64809
  -4  -5  -5 1100.49 1024.98   1-0.68632 0.11765 0.60797-0.98681-0.39914-0.11115
  -5   9  -5  502.28 1345.21   1 0.84124-0.88488 0.53655 0.14375-0.06648-0.44307
  -9   4   5 2517.75 1807.43   1-0.19341-0.41643 0.97584-0.67404-0.10156 0.61011
  -4  -5  -431254.6912350.29   1-0.67906 0.11039 0.61502-0.99385-0.40076-0.00747
  -5   9  -432843.58 4185.06   1 0.86847-0.91211 0.49389 0.18640-0.04255-0.36509
  -9   4   438918.7110328.39   1-0.14226-0.46758 0.97600-0.67421-0.16482 0.57166
  -4  -5  -3  739.99 1071.05   1-0.68419 0.11551 0.61006-0.98890-0.39963 0.09344
  -9   4   3 1643.94  926.84   1-0.23896-0.37359 0.87255-0.56941-0.42607 0.73225
  -5   9  -3 3520.66 2406.40   1 0.88909-0.93273 0.45716 0.22313-0.02251-0.28321
  -9   4   3 1545.13 2168.69   1-0.08984-0.52000 0.96965-0.66785-0.22737 0.53250
  -4  -5  -2 3359.10 1635.05   1-0.70060 0.13193 0.59371-0.97255-0.39579 0.19167
  -9   4   2 7477.50 2564.97   1-0.10552-0.50703 0.90437-0.60123-0.41348 0.61759
  -5   9  -2 4777.05 2279.75   1 0.90375-0.94740 0.42798 0.25232-0.00693-0.19688
  -9   4   2 6214.35 2271.79   1-0.03643-0.57341 0.95668-0.65488-0.28884 0.49226
  -4  -5  -1 1500.75 1279.95   1-0.72663 0.15832 0.56604-0.94463-0.38935 0.28740
  -9   4   1  534.78 1196.47   1-0.00234-0.61022 0.91712-0.61398-0.39859 0.50065
  -5   9  -1 2186.37 2270.77   1 0.91285-0.95650 0.40826 0.27204 0.00343-0.10534
  -9   4   1 2199.59 1378.72   1 0.01748-0.62792 0.93735-0.63526-0.34793 0.44960
  -4  -5   072145.0011453.02   1-0.76101 0.19270 0.52652-0.90511-0.37898 0.37898
  -9   4   076285.3211951.71   1 0.07401-0.68657 0.92004-0.61690-0.38475 0.38475
  -5   9   062803.92 4636.71   1 0.91633-0.95997 0.40033 0.27997 0.00756-0.00756
  -9   4   061414.2712595.46   1 0.07109-0.68153 0.91147-0.60938-0.40516 0.40516
  -4  -5   1 2181.62 1810.63   1-0.80108 0.23278 0.47480-0.85339-0.36444 0.46639
  -9   4  -1 1192.48 1556.80   1 0.12715-0.73971 0.91879-0.61565-0.37369 0.27163
  -5   9   1  998.56 1196.15   1 0.91333-0.95698 0.40717 0.27312 0.00399 0.09791
  -9   4  -1 1259.79 1026.40   1 0.12342-0.73387 0.87991-0.57781-0.45882 0.35715
  -4  -5   2 4603.96 1940.26   1-0.84408 0.27577 0.41048-0.78907-0.34500 0.54891
  -9   4  -2 7117.78 3852.59   1 0.16033-0.77289 0.91662-0.61348-0.36618 0.16206
  -5   9   2 4058.01 1156.19   1 0.90146-0.94510 0.43275 0.24755-0.00946 0.21328
  -9   4  -2 4473.88 2149.62   1 0.17294-0.78339 0.84409-0.54199-0.50754 0.30419
  -4  -5   3 1650.89 2239.49   1-0.88684 0.31854 0.33336-0.71195-0.31995 0.62581
  -9   4  -3  256.42 1089.36   1 0.17624-0.78880 0.91520-0.61206-0.36241 0.05624
  -5   9   3  712.61  846.28   1 0.87499-0.91864 0.48275 0.19755-0.03642 0.34215
  -4  -5   429913.48 3523.94   1-0.92594 0.35764 0.24351-0.62210-0.28865 0.69647
  -9   4  -434130.73 5965.46   1 0.17696-0.78952 0.91512-0.61199-0.36224-0.04598
  -9   4  -5  645.13  983.28   1 0.16396-0.77652 0.91632-0.61318-0.36533-0.14495
   4   5  -5  924.43 1446.94   1 0.95773-0.39048-0.14126 0.51915 0.25058-0.76026
  -5   9   5 1204.12 1304.89   1 0.12170-0.16530 0.88104-0.20133-0.45710 0.96547
  -9   4  -6 2152.73 1543.63   1 0.13815-0.75071 0.91819-0.61505-0.37125-0.24109
   4   5  -6 1623.13 1608.67   1 0.97837-0.41113-0.02716 0.40504 0.20503-0.81664
  -5   9   6 1078.70 1150.37   1 0.02357-0.06718 0.93473-0.25502-0.35455 0.96459
  -3  -6  -5  231.83  986.08   1-0.78014 0.25555 0.50268-0.95698-0.37240-0.13736
  -6   9  -5  187.34 1419.04   1 0.78342-0.91435 0.61157 0.06873-0.11051-0.39904
  -9   3   5 3102.12 2620.89   1-0.25051-0.40289 0.96770-0.74135-0.02816 0.53672
  -3  -6  -4 8306.65 3880.29   1-0.77093 0.24634 0.51434-0.96864-0.37565-0.03216
  -6   9  -4 8979.00 2734.43   1 0.81165-0.94257 0.57716 0.10313-0.08998-0.31766
  -9   3   4 9478.13 3640.66   1-0.20726-0.44614 0.97466-0.74832-0.08404 0.49088
  -3  -6  -3 1352.60  945.79   1-0.77287 0.24828 0.51191-0.96621-0.37498 0.06911
  -9   3   3    2.65  660.32   1-0.35132-0.30483 0.83175-0.60445-0.42982 0.73600
  -6   9  -3  908.45 1417.12   1 0.83277-0.96370 0.54871 0.13159-0.07343-0.23229
  -9   3   3 1009.44 1300.82   1-0.16359-0.48981 0.97672-0.75037-0.13872 0.44385
  -3  -6  -224491.56 9522.87   1-0.78472 0.26014 0.49674-0.95104-0.37073 0.16682
  -9   3   223597.38 8419.51   1-0.22817-0.42813 0.87579-0.64843-0.42534 0.62946
  -6   9  -220375.86 2970.80   1 0.84709-0.97801 0.52786 0.15243-0.06154-0.14227
  -9   3   223984.25 5753.62   1-0.11986-0.53354 0.97408-0.74773-0.19183 0.39525
  -3  -6  -1 1007.01 1185.81   1-0.80494 0.28036 0.46944-0.92375-0.36287 0.26092
  -9   3   1  -40.70 1410.92   1-0.12835-0.52795 0.90017-0.67282-0.41617 0.51823
  -6   9  -1  309.20 1498.55   1 0.85446-0.98539 0.51656 0.16374-0.05517-0.04673
  -9   3   1  601.64  852.01   1-0.07662-0.57678 0.96704-0.74069-0.24280 0.34451
  -3  -6   015900.02 5906.97   1-0.83162 0.30703 0.43025-0.88455-0.35112 0.35112
  -9   3   012536.75 8898.80   1-0.05150-0.60481 0.91231-0.68496-0.40623 0.40623
  -6   9   013455.82 2566.47   1 0.85410-0.98503 0.51712 0.16318-0.05549 0.05549
  -9   3   014920.85 4571.72   1-0.03494-0.61910 0.95644-0.72987-0.28980 0.28980
  -3  -6   1 1697.51 1688.54   1-0.86249 0.33790 0.37925-0.83356-0.33507 0.43702
  -9   3  -1 1795.04 1239.92   1 0.00420-0.66051 0.91759-0.69023-0.39750 0.29544
  -6   9   1   88.09 1067.39   1 0.84404-0.97496 0.53242 0.14787-0.06413 0.16604
  -9   3  -1  496.50  534.99   1 0.00424-0.65829 0.94275-0.71618-0.33345 0.23178
  -3  -6   218786.09 5995.83   1-0.89498 0.37039 0.31659-0.77089-0.31427 0.51818
  -9   3  -226657.20 8201.00   1 0.04085-0.69716 0.91945-0.69210-0.39106 0.18694
  -6   9   221896.70 2760.15   1 0.82007-0.95099 0.56613 0.11417-0.08351 0.28734
  -9   3  -216565.89 5174.56   1 0.03887-0.69293 0.92780-0.70123-0.37104 0.16769
  -3  -6   3  505.83 1362.05   1-0.92631 0.40172 0.24253-0.69683-0.28830 0.59416
  -9   3  -3  710.66  791.81   1 0.06044-0.71675 0.91993-0.69257-0.38738 0.08121
  -9   3  -410237.55 4156.77   1 0.06464-0.72096 0.91998-0.69263-0.38658-0.02165
   3   6  -4 5756.84 2001.04   1 0.95349-0.42988-0.15766 0.61112 0.25688-0.66462
   3   6  -5  207.58 1520.91   1 0.97365-0.45004-0.06225 0.51571 0.21936-0.72904
  -6   9   5  994.87  739.51   1 0.10484-0.23565 0.89184-0.21213-0.44003 0.94840
  -7   9  -5 2908.62 2592.95   1 0.71635-0.93456 0.68057-0.00026-0.15377-0.35578
  -9   2   5 3917.42 1957.60   1-0.30847-0.38849 0.94993-0.79903 0.04963 0.45891
  -2  -7  -4 4476.80 2241.73   1-0.85298 0.37211 0.39570-0.92573-0.34034-0.06747
  -7   9  -4 7763.87 2956.35   1 0.74403-0.96224 0.65399 0.02631-0.13674-0.27090
  -9   2   4 6798.49 2468.42   1-0.27378-0.42318 0.96178-0.81088 0.00264 0.40419
  -2  -7  -3 7861.15 3039.32   1-0.85159 0.37072 0.39805-0.92807-0.34108 0.03521
  -9   2   3 6413.75 3555.72   1-0.45124-0.24865 0.78284-0.63131-0.42840 0.73458
  -7   9  -3 5857.15 2610.86   1 0.76397-0.98218 0.63326 0.04704-0.12378-0.18194
  -9   2   3 6693.02 2958.50   1-0.23998-0.45698 0.96986-0.81897-0.04193 0.34706
  -2  -7  -221797.12 7093.53   1-0.85848 0.37761 0.38627-0.91630-0.33733 0.13342
  -9   2   225508.8910668.64   1-0.34034-0.35956 0.83639-0.68485-0.42966 0.63378
  -7   9  -226476.72 4159.65   1 0.77606-0.99427 0.61996 0.06034-0.11561-0.08820
  -9   2   221928.24 6447.79   1-0.20781-0.48915 0.97461-0.82371-0.08333 0.28675
  -2  -7  -1 5502.31 1797.40   1-0.87217 0.39130 0.36169-0.89171-0.32936 0.22740
  -9   2   1 8060.57 3655.67   1-0.24775-0.45231 0.86982-0.71825-0.42663 0.52869
  -7   9  -1 6872.83 1980.80   1 0.77965-0.99786 0.61590 0.06440-0.11314 0.01123
  -9   2   1 6535.04 2270.09   1-0.17837-0.51859 0.97656-0.82566-0.12039 0.22210
  -2  -7   0 8079.19 2898.18   1-0.89089 0.41002 0.32512-0.85514-0.31717 0.31717
  -9   2   010628.81 3470.70   1-0.17367-0.52639 0.89033-0.73876-0.42087 0.42087
  -7   9   0 9574.65 2853.73   1 0.77320-0.99141 0.62315 0.05715-0.11757 0.11757
  -9   2   0 8122.08 3005.04   1-0.15339-0.54357 0.97652-0.82562-0.15124 0.15124
  -2  -7   1 6627.52 3355.64   1-0.91257 0.43170 0.27716-0.80718-0.30063 0.40258
  -9   2  -1 9221.39 3064.21   1-0.11806-0.58200 0.90213-0.75056-0.41499 0.31293
  -7   9   1 7930.99 2461.12   1 0.75372-0.97193 0.64409 0.03621-0.13052 0.23243
  -9   2  -1 6002.40 2526.93   1-0.13583-0.56113 0.97557-0.82467-0.17262 0.07091
  -2  -7   225401.03 3726.57   1-0.93497 0.45410 0.21836-0.74838-0.27951 0.48342
  -9   2  -225315.25 4486.80   1-0.07990-0.62016 0.90848-0.75691-0.41019 0.20608
  -7   9   226064.01 3298.80   1 0.71546-0.93367 0.68139-0.00109-0.15430 0.35812
  -9   2  -3 9237.17 3271.34   1-0.05797-0.64209 0.91151-0.75994-0.40716 0.10099
   2   7  -3 8397.22 2942.75   1 0.95560-0.47562-0.14963 0.67867 0.25381-0.55961
  -9   2  -4 6687.11 3347.50   1-0.05108-0.64898 0.91236-0.76079-0.40617-0.00205
   2   7  -4 5426.30 2440.11   1 0.97226-0.49228-0.07094 0.59998 0.22287-0.63061
  -7   9   4 6712.33 3754.32   1 0.16604-0.38405 0.84944-0.16973-0.50087 0.90757
  -9   2  -5 2436.42 1386.53   1-0.05826-0.64180 0.91147-0.75990-0.40720-0.10308
   2   7  -5  917.90 1493.21   1 0.98226-0.50228 0.01654 0.51249 0.18678-0.69646
  -7   9   5 2676.57 1315.85   1 0.08359-0.30161 0.90450-0.22479-0.41818 0.92655
  -8   9  -5 2739.71 2418.86   1 0.64162-0.94743 0.74175-0.06074-0.19523-0.31412
  -1  -8  -4 9047.57 4173.62   1-0.91803 0.48088 0.26387-0.86961-0.29593-0.11188
  -9   1   411473.24 3941.62   1-0.64564-0.09800 0.64582-0.57005-0.40749 0.81573
  -8   9  -412776.35 3006.40   1 0.66748-0.97328 0.72214-0.04113-0.18160-0.22588
  -1  -8  -3 3184.52 1793.84   1-0.91428 0.47713 0.27306-0.87880-0.29918-0.00667
  -9   1   3 4123.00 2099.74   1-0.53833-0.20531 0.72922-0.65346-0.42240 0.72858
  -8   9  -3 3690.85 2534.17   1 0.68486-0.99067 0.70806-0.02706-0.17205-0.13356
  -9   1   3 2095.92 1473.77   1-0.31585-0.42467 0.94692-0.87147 0.05980 0.24532
  -1  -8  -212678.67 4780.49   1-0.91688 0.47972 0.26672-0.87247-0.29694 0.09303
  -9   1   213650.05 6999.55   1-0.44107-0.30257 0.78840-0.71264-0.42880 0.63292
  -8   9  -212961.39 3002.88   1 0.69362-0.99911 0.70070-0.02040-0.16702-0.03680
  -9   1   212533.97 5615.20   1-0.29587-0.44465 0.95467-0.87922 0.03242 0.17100
  -1  -8  -1 1376.14  898.27   1-0.92466 0.48750 0.24691-0.85265-0.28987 0.18792
  -9   1   1 4517.24 2482.90   1-0.35720-0.38644 0.82921-0.75345-0.42989 0.53195
  -8   9  -1 1477.49 1052.20   1 0.69209-0.99758 0.70201-0.02170-0.16788 0.06597
  -9   1   1 3877.58 1890.29   1-0.28154-0.45898 0.95945-0.88400 0.01304 0.08866
  -1  -8   028485.86 4459.20   1-0.93613 0.49897 0.21498-0.82072-0.27827 0.27827
  -9   1   032895.3411702.68   1-0.28842-0.45522 0.85647-0.78070-0.42809 0.42809
  -8   9   024232.75 3450.82   1 0.67807-0.98388 0.71365-0.03264-0.17582 0.17582
  -9   1   025696.12 6152.23   1-0.27618-0.46434 0.96108-0.88563 0.00585-0.00585
  -9   1  -1 4179.00 2564.66   1-0.23533-0.50849 0.87365-0.79787-0.42583 0.32377
  -8   9   1 2225.81 1196.14   1 0.64852-0.95432 0.73667-0.05566-0.19166 0.29353
   1   8  -1 1528.03 1435.57   1 0.94937-0.51302-0.17253 0.77715 0.26253-0.36447
  -9   1  -214155.82 4724.30   1-0.19760-0.54622 0.88432-0.80853-0.42299 0.21888
  -8   9   215685.40 2671.23   1 0.59648-0.90228 0.77257-0.09157-0.21754 0.42129
   1   8  -216837.23 3787.26   1 0.96292-0.52657-0.11919 0.72381 0.24201-0.44588
  -9   1  -3 2502.66 1398.73   1-0.17481-0.56900 0.89006-0.81427-0.42098 0.11480
   1   8  -3 2014.52 1766.83   1 0.97453-0.53819-0.05645 0.66106 0.21701-0.52282
  -9   1  -411304.40 5414.80   1-0.16630-0.57751 0.89207-0.81629-0.42017 0.01193
   1   8  -410673.55 2776.55   1 0.98215-0.54580 0.01487 0.58973 0.18749-0.59523
  -8   9   413572.25 4894.08   1 0.13495-0.44018 0.87209-0.19238-0.47035 0.87705
  -9   1  -5 2051.62 1578.44   1-0.17145-0.57237 0.89086-0.81508-0.42066-0.08962
   1   8  -5  379.51 1389.42   1 0.98368-0.54734 0.09397 0.51064 0.15338-0.66306
  -8   9   5 2062.57 1136.07   1 0.05863-0.36386 0.91806-0.23835-0.39206 0.90043
  -9   0   4 3489.22 2837.42   1-0.70427-0.08312 0.58996-0.58996-0.39489 0.80313
  -9   9  -4 2744.42 1666.45   1 0.58467-0.97785 0.77998-0.09898-0.22309-0.18439
  -9   0   3 2049.35 2040.00   1-0.61379-0.17360 0.67287-0.67287-0.41291 0.71909
  -9   9  -3 2833.90 1992.58   1 0.59875-0.99193 0.77112-0.09012-0.21646-0.08914
   0   9   3 2158.40 1477.48   1 0.95718-0.56447-0.14346 0.82366 0.25143 0.05436
  -9   0   215871.51 6487.42   1-0.52986-0.25752 0.73494-0.73494-0.42320 0.62732
  -9   9  -211840.83 2793.05   1 0.60293-0.99611 0.76842-0.08741-0.21446 0.01072
   0   9   210083.23 2661.41   1 0.95705-0.56434-0.14396 0.82415 0.25162-0.04775
  -9   9  -1 2160.62 1563.22   1 0.59580-0.98897 0.77301-0.09201-0.21787 0.11600
   0   9   1 1684.87 1944.18   1 0.96038-0.56767-0.13029 0.81048 0.24634-0.14440
  -9   0   0 6391.73 2996.89   1-0.39369-0.39369 0.81253-0.81253-0.42988 0.42988
  -9   9   0 5896.61 2374.40   1 0.57490-0.96808 0.78592-0.10492-0.22761 0.22761
   0   9   0 4003.87 1851.11   1 0.96609-0.57338-0.10431 0.78450 0.23616-0.23616
  -9   0  -1  222.55 1249.21   1-0.34460-0.44278 0.83460-0.83460-0.42973 0.32767
  -9   9   1  626.34 1222.66   1 0.53620-0.92938 0.80781-0.12681-0.24477 0.34664
   0   9  -1  259.76 1337.11   1 0.97284-0.58013-0.06738 0.74757 0.22143-0.32337
  -9   0  -214599.01 4372.07   1-0.30897-0.47841 0.84888-0.84888-0.42887 0.22474
  -9   9   214705.52 2985.88   1 0.47295-0.86613 0.83850-0.15749-0.27060 0.47434
   0   9  -214336.82 3804.36   1 0.97909-0.58638-0.02062 0.70081 0.20233-0.40620
  -9   0  -3 2585.64 1514.81   1-0.28678-0.50060 0.85705-0.85705-0.42802 0.12184
   0   9  -3 2419.17 1986.91   1 0.98323-0.59052 0.03499 0.64520 0.17895-0.48476
  -9   9   3 4003.75 1840.17   1 0.17009-0.56252 0.84631-0.16660-0.50479 0.80981
  -9   0  -4 4299.71 2348.60   1-0.27782-0.50957 0.86020-0.86020-0.42761 0.01937
   0   9  -4 4769.00 2001.48   1 0.98355-0.59084 0.09855 0.58163 0.15136-0.55910
  -9   9   4 5458.71 2418.26   1 0.10108-0.49351 0.89415-0.21444-0.43618 0.84288
  -9  -1  -3 2077.98 1774.00   1-0.39122-0.43991 0.81371-0.88947-0.42990 0.12372
  -1  10  -3 -340.53 1312.42   1 0.98238-0.63330 0.12340 0.63236 0.14032-0.44613
 -10   9   3 1476.56 1682.71   1 0.12856-0.60820 0.87646-0.19675-0.46398 0.76900
  -9  -1  -216830.43 8064.25   1-0.41183-0.41930 0.80363-0.87939-0.42961 0.22549
 -10   9   221046.12 3054.79   1 0.35120-0.83175 0.88219-0.20119-0.31365 0.51740
  -1  10  -220296.43 3905.02   1 0.98398-0.63490 0.07512 0.68065 0.16164-0.36551
  -9  -1  -1 3020.21 1977.04   1-0.44435-0.38677 0.78662-0.86239-0.42867 0.32661
 -10   9   1  865.58 1094.05   1 0.42230-0.90285 0.85897-0.17797-0.28951 0.39138
  -1  10  -1 2329.73 1942.95   1 0.98324-0.63417 0.03534 0.72042 0.17880-0.28073
  -9  -1   0    8.32  934.76   1-0.48842-0.34271 0.76131-0.83708-0.42643 0.42643
  -1  10   0  653.47 1488.28   1 0.98146-0.63238 0.00518 0.75058 0.19157-0.19157
  -9  -1   1  403.28 1713.25   1-0.54326-0.28787 0.72584-0.80161-0.42191 0.52397
 -10   9  -1  298.43 1301.52   1 0.49556-0.97611 0.82822-0.14721-0.26166 0.15979
  -1  10   1 2465.89 2081.86   1 0.97977-0.63069-0.01408 0.76985 0.19962-0.09768
  -9  -1   223623.14 9094.19   1-0.60753-0.22360 0.67794-0.75371-0.41387 0.61799
 -10   9  -220632.73 3895.08   1 0.50801-0.98856 0.82223-0.14123-0.25660 0.05286
  -1  10   219997.70 3641.48   1 0.97907-0.63000-0.02082 0.77659 0.20241 0.00145
  -9  -1   3  -51.59 1345.41   1-0.67911-0.15202 0.61497-0.69074-0.40075 0.70693
 -10   9  -3  349.69 1422.34   1 0.50822-0.98877 0.82213-0.14113-0.25652-0.04909
  -1  10   3 1225.83 1623.28   1 0.97990-0.63082-0.01277 0.76854 0.19907 0.10672
  -8  -2  -4 2390.04 1605.38   1-0.44332-0.34406 0.78718-0.93872-0.42871 0.02047
  -2  10  -4 2107.02 2438.86   1 0.96603-0.70422 0.24419 0.51157 0.08455-0.49229
 -10   8   4  664.34 1294.91   1 0.02854-0.55178 0.93254-0.32835-0.35992 0.76662
  -8  -2  -3 5531.21 2700.75   1-0.45182-0.33556 0.78252-0.93405-0.42837 0.12219
  -2  10  -3 6112.87 2136.71   1 0.97539-0.71358 0.19145 0.56431 0.10934-0.41515
 -10   8   3 5457.80 2442.83   1 0.09138-0.61462 0.89998-0.29579-0.42623 0.73125
  -8  -2  -224978.7012153.04   1-0.47229-0.31509 0.77089-0.92242-0.42738 0.22326
 -10   8   230870.82 3445.73   1 0.25953-0.78377 0.90351-0.29817-0.34103 0.54478
  -2  10  -225297.95 3345.34   1 0.98067-0.71886 0.14611 0.60965 0.13011-0.33398
 -10   8   230706.9711743.34   1 0.15276-0.67600 0.85940-0.25521-0.48794 0.69128
  -8  -2  -111745.60 5650.64   1-0.50438-0.28301 0.75146-0.90299-0.42532 0.32325
 -10   8   112925.23 2795.41   1 0.33929-0.86352 0.88549-0.28016-0.31744 0.41931
  -2  10  -113563.12 3310.70   1 0.98313-0.72132 0.10931 0.64645 0.14660-0.24854
  -8  -2   0  970.68  787.87   1-0.54741-0.23997 0.72297-0.87450-0.42148 0.42148
 -10   8   0 1065.72 1482.93   1 0.39239-0.91663 0.86949-0.26416-0.29999 0.29999
  -8  -2   116779.91 6443.94   1-0.60026-0.18712 0.68374-0.83527-0.41494 0.51700
 -10   8  -113479.20 2702.30   1 0.42517-0.94941 0.85790-0.25257-0.28847 0.18660
  -2  10   115372.02 3071.74   1 0.98398-0.72217 0.06696 0.68880 0.16519-0.06326
  -8  -2   226601.46 9918.25   1-0.66119-0.12620 0.63182-0.78335-0.40450 0.60862
 -10   8  -227537.41 3819.97   1 0.44179-0.96602 0.85150-0.24616-0.28241 0.07866
  -2  10   228545.63 3902.90   1 0.98397-0.72216 0.06508 0.69068 0.16600 0.03786
  -8  -2   3 6791.54 3261.65   1-0.72747-0.05940 0.56512-0.71656-0.38912 0.69498
 -10   8  -3 4549.07 2084.32   1 0.44500-0.96924 0.85022-0.24488-0.28122-0.02439
  -2  10   3 7411.54 2355.62   1 0.98395-0.72214 0.07964 0.67613 0.15967 0.14613
  -8  -2   4  393.10  925.15   1-0.79622 0.00934 0.48145-0.63288-0.36636 0.77418
 -10   8  -4 1138.96 1365.67   1 0.43660-0.96084 0.85354-0.24820-0.28432-0.12316
  -7  -3  -4 2904.32 1710.72   1-0.51344-0.23020 0.74570-0.97300-0.42461 0.01637
  -3  10  -4 2408.76 1757.02   1 0.94732-0.77275 0.31632 0.43957 0.05019-0.45784
 -10   7   4 3666.75 2699.51   1-0.01448-0.55236 0.94972-0.42106-0.31274 0.71944
  -7  -3  -315444.84 4886.29   1-0.52139-0.22225 0.74054-0.96784-0.42395 0.11777
  -3  10  -314435.02 3265.67   1 0.96071-0.78617 0.26769 0.48807 0.07328-0.37909
 -10   7   314870.75 5022.05   1 0.04617-0.61302 0.92430-0.39564-0.37884 0.68386
  -7  -3  -229511.2111714.67   1-0.54103-0.20261 0.72738-0.95468-0.42213 0.21801
 -10   7   224309.78 8141.68   1 0.15501-0.72382 0.91704-0.38655-0.36741 0.57153
  -3  10  -225873.02 4112.50   1 0.96953-0.79499 0.22668 0.52908 0.09286-0.29673
 -10   7   229808.18 9089.76   1 0.10620-0.67304 0.89099-0.36233-0.44141 0.64476
  -7  -3  -117491.49 5971.25   1-0.57174-0.17190 0.70552-0.93282-0.41874 0.31668
 -10   7   122347.15 4435.47   1 0.24323-0.81115 0.90635-0.37668-0.34549 0.44736
  -3  10  -117385.31 3428.97   1 0.97497-0.80043 0.19432 0.56144 0.10801-0.20995
 -10   7   122419.81 9239.25   1 0.16459-0.73144 0.85054-0.32188-0.49947 0.60115
  -7  -3   0 4810.25 2140.85   1-0.61254-0.13110 0.67389-0.90119-0.41310 0.41310
 -10   7   0 4720.78 2039.64   1 0.30328-0.87121 0.89449-0.36482-0.32847 0.32847
  -3  10   0 2788.63 1482.00   1 0.97794-0.80340 0.17219 0.58357 0.11822-0.11822
  -7  -3   118642.52 7739.55   1-0.66196-0.08168 0.63111-0.85841-0.40435 0.50641
 -10   7  -123792.25 3872.11   1 0.34189-0.90981 0.88479-0.35512-0.31662 0.21475
  -3  10   117852.60 3009.71   1 0.97908-0.80454 0.16224 0.59352 0.12278-0.02084
  -7  -3   228767.7911626.85   1-0.71772-0.02544 0.57566-0.80281-0.39177 0.59568
 -10   7  -227579.90 3759.91   1 0.36316-0.93108 0.87872-0.34905-0.30978 0.10603
  -3  10   229162.59 3577.08   1 0.97855-0.80401 0.16701 0.58875 0.12060 0.08327
  -7  -3   319559.06 8036.15   1-0.77755 0.03438 0.50599-0.73314-0.37333 0.67920
 -10   7  -315965.15 3599.37   1 0.36993-0.93786 0.87667-0.34700-0.30755 0.00193
  -3  10   316018.16 2592.73   1 0.97558-0.80104 0.19010 0.56566 0.10996 0.19583
  -7  -3   4 3707.03 2025.62   1-0.83779 0.09463 0.42058-0.64773-0.34814 0.75596
 -10   7  -4 2243.04 2102.73   1 0.36414-0.93207 0.87842-0.34875-0.30945-0.09803
  -6  -4  -5  753.12 1057.22   1-0.59611-0.10379 0.68700-0.99007-0.41553-0.09476
  -4  10  -5  882.32 1412.14   1 0.89710-0.80981 0.44159 0.31429-0.01416-0.49539
 -10   6   5 1764.22 2210.05   1-0.12083-0.48901 0.97418-0.52149-0.19066 0.69922
  -6  -4  -421587.95 7586.70   1-0.59103-0.10887 0.69095-0.99402-0.41624 0.00800
  -4  10  -421475.22 3367.95   1 0.91951-0.83222 0.39289 0.36300 0.01142-0.41907
 -10   6   427559.77 7282.57   1-0.06433-0.54551 0.96426-0.51156-0.25701 0.66386
  -6  -4  -3 1746.30 1379.80   1-0.59777-0.10212 0.68570-0.98876-0.41530 0.10912
  -4  10  -3 2075.23 2587.18   1 0.93609-0.84880 0.35018 0.40571 0.03326-0.33899
 -10   6   3 3163.23 2339.97   1-0.00702-0.60342 0.94704-0.49390-0.32102 0.62604
  -6  -4  -2  860.99 1792.70   1-0.61568-0.08421 0.67132-0.97439-0.41261 0.20849
 -10   6   2 1155.08 1096.45   1 0.04337-0.65593 0.91953-0.46483-0.39059 0.59471
  -4  10  -2  159.04 1384.38   1 0.94790-0.86063 0.31455 0.44121 0.05037-0.25424
 -10   6   2 1989.53 1466.46   1 0.04993-0.66038 0.92246-0.46932-0.38284 0.58619
  -6  -4  -1 1418.52 1619.85   1-0.64386-0.05603 0.64738-0.95045-0.40782 0.30576
 -10   6   1 2794.38 1565.22   1 0.13619-0.74875 0.91831-0.46360-0.37169 0.47375
  -4  10  -1 2793.44 2112.60   1 0.95552-0.86825 0.28801 0.46775 0.06341-0.16535
 -10   6   1 3911.52 1741.27   1 0.10607-0.71652 0.89107-0.43793-0.44128 0.54295
  -6  -4   050063.8015582.94   1-0.68105-0.01885 0.61310-0.91617-0.40032 0.40032
 -10   6   045130.41 5639.49   1 0.20218-0.81474 0.91233-0.45762-0.35603 0.35603
  -4  10   046714.32 4258.49   1 0.95963-0.87236 0.27211 0.48365 0.07114-0.07114
 -10   6   050543.7312523.04   1 0.16034-0.77079 0.85376-0.40062-0.49535 0.49534
  -6  -4   1 2914.38 2295.52   1-0.72528 0.02583 0.56751-0.87038-0.38973 0.49168
 -10   6  -1 3402.55 2169.49   1 0.24691-0.85852 0.90573-0.45172-0.34449 0.24262
  -4  10   1 2845.53 2218.08   1 0.96036-0.87309 0.26911 0.48665 0.07259 0.02933
  -6  -4   2 1731.47 1499.07   1-0.77477 0.07532 0.50951-0.81238-0.37431 0.57822
 -10   6  -2 1439.89 2120.08   1 0.27291-0.88452 0.90097-0.44697-0.33729 0.13354
  -4  10   2 2259.69 1936.84   1 0.95711-0.86984 0.28200 0.47376 0.06634 0.13752
  -6  -4   3 4110.94 2093.22   1-0.82648 0.12703 0.43812-0.74099-0.35352 0.65938
 -10   6  -3 2817.72 2531.26   1 0.28355-0.89516 0.89881-0.44481-0.33425 0.02863
  -6  -4   425032.40 8849.97   1-0.87708 0.17763 0.35247-0.65534-0.32632 0.73414
 -10   6  -423857.08 3868.69   1 0.28079-0.89240 0.89938-0.44538-0.33504-0.07244
  -6  -4   5 1064.21 1911.81   1-0.92274 0.22329 0.25193-0.55480-0.29168 0.80145
 -10   6  -5 1060.58 1399.55   1 0.26592-0.87753 0.90232-0.44831-0.33925-0.17010
  -5  -5  -5  138.71  442.40   1-0.67922 0.02305 0.61487-0.99371-0.40073-0.10957
  -5  10  -5 1189.62 1965.42   1 0.85634-0.85634 0.51361 0.24228-0.05352-0.45603
 -10   5   5  257.59 1154.27   1-0.17071-0.48269 0.97671-0.59947-0.12991 0.63846
  -5  -5  -449861.8814166.74   1-0.67279 0.01663 0.62100-0.99984-0.40211-0.00612
  -5  10  -447873.86 4878.47   1 0.88132-0.88132 0.47153 0.28436-0.03029-0.37735
 -10   5   463742.7312232.28   1-0.11956-0.53384 0.97404-0.59680-0.19218 0.59903
  -5  -5  -3  680.92 1703.37   1-0.67761 0.02145 0.61642-0.99525-0.40108 0.09490
 -10   5   3  264.77  505.28   1-0.19528-0.46103 0.88492-0.50600-0.42280 0.72897
  -5  10  -3 1996.93 2436.52   1 0.90017-0.90017 0.43538 0.32051-0.01086-0.29487
 -10   5   3  486.07  894.62   1-0.06781-0.58559 0.96508-0.58783-0.25300 0.55813
  -5  -5  -2 5234.64 2287.91   1-0.69280 0.03664 0.60157-0.98040-0.39765 0.19353
 -10   5   2 5922.94 1935.63   1-0.07125-0.58505 0.90973-0.53081-0.40902 0.61314
  -5  10  -2 6050.96 2342.34   1 0.91360-0.91360 0.40659 0.34930 0.00430-0.20812
 -10   5   2 6420.34 4242.99   1-0.01582-0.63823 0.95019-0.57257-0.31125 0.51460
  -5  -5  -1  763.00 1028.21   1-0.71696 0.06122 0.57647-0.95505-0.39197 0.29002
 -10   5   1  856.52 1004.97   1 0.02366-0.67998 0.91874-0.53981-0.39415 0.49620
  -5  10  -1  790.40 1995.78   1 0.92205-0.92205 0.38678 0.36911 0.01458-0.11649
 -10   5   1 1353.38  988.41   1 0.03551-0.68956 0.92937-0.55175-0.36743 0.46910
  -5  -5   0116044.9 7319.93   1-0.74922 0.09349 0.54052-0.91911-0.38273 0.38273
 -10   5   0123998.415376.66   1 0.09356-0.74987 0.91990-0.54097-0.38082 0.38082
  -5  10   0120146.8 6547.86   1 0.92562-0.92562 0.37794 0.37794 0.01912-0.01912
 -10   5   0117590.5 6692.76   1 0.08553-0.73959 0.90339-0.52577-0.42019 0.42019
  -5  -5   1 1203.14 1777.47   1-0.78736 0.13163 0.49328-0.87187-0.36975 0.47171
 -10   5  -1  872.06 1487.07   1 0.14209-0.79840 0.91795-0.53902-0.37037 0.26831
  -5  10   1  134.32 1191.30   1 0.92377-0.92377 0.38255 0.37333 0.01676 0.08515
 -10   5  -1  653.06 1086.50   1 0.13312-0.78718 0.87335-0.49573-0.46853 0.36686
  -5  -5   2 7334.73 3793.14   1-0.82908 0.17334 0.43416-0.81274-0.35231 0.55622
 -10   5  -2 4017.75 2873.65   1 0.17232-0.82864 0.91557-0.53665-0.36335 0.15923
  -5  10   2 5503.08 1892.43   1 0.91479-0.91479 0.40388 0.35201 0.00571 0.19810
 -10   5  -2 5313.58 2502.28   1 0.17687-0.83092 0.84099-0.46337-0.51132 0.30797
  -5  -5   3  573.53 1346.94   1-0.87165 0.21592 0.36266-0.74125-0.32967 0.63554
 -10   5  -3  656.30 1164.49   1 0.18669-0.84301 0.91412-0.53520-0.35988 0.05370
  -5  -5   454367.82 9903.84   1-0.91202 0.25628 0.27849-0.65708-0.30109 0.70891
 -10   5  -454352.4415944.51   1 0.18704-0.84335 0.91409-0.53516-0.35979-0.04843
 -10   5  -5 1838.02 1565.73   1 0.17464-0.83095 0.91535-0.53643-0.36280-0.14748
  -5  10   5  -65.50 1439.29   1 0.13991-0.13991 0.86864-0.11340-0.47527 0.98364
  -4  -6  -5  186.31  763.57   1-0.76168 0.14966 0.52571-0.98001-0.37876-0.13100
  -6  10  -5 1220.49 1522.90   1 0.80604-0.89332 0.58431 0.17158-0.09419-0.41536
 -10   4   5 1729.11 2202.45   1-0.22396-0.47300 0.97258-0.67078-0.06268 0.57123
  -4  -6  -422367.54 8656.04   1-0.75371 0.14170 0.53524-0.98955-0.38133-0.02648
  -6  10  -422005.75 4225.53   1 0.83239-0.91967 0.54925 0.20664-0.07374-0.33389
 -10   4   423475.60 7893.61   1-0.17931-0.51765 0.97653-0.67474-0.11923 0.52607
  -4  -6  -3 2804.03 2561.54   1-0.75608 0.14406 0.53243-0.98674-0.38058 0.07471
 -10   4   3 3849.29 1897.24   1-0.30118-0.39871 0.85181-0.54874-0.42859 0.73478
  -6  10  -3 1801.53 1783.84   1 0.85219-0.93947 0.52010 0.23579-0.05716-0.24857
 -10   4   3 3769.20 1982.90   1-0.13450-0.56246 0.97547-0.67367-0.17423 0.47936
  -4  -6  -2 1022.21 1631.82   1-0.76778 0.15576 0.51825-0.97255-0.37673 0.17282
 -10   4   2  711.26 1481.20   1-0.18397-0.51609 0.88781-0.58467-0.42181 0.62593
  -6  10  -2 1094.73 1378.49   1 0.86582-0.95311 0.49831 0.25758-0.04499-0.15882
 -10   4   2 1262.42 1627.13   1-0.08995-0.60701 0.96967-0.66787-0.22724 0.43066
  -4  -6  -1 1757.05 1793.14   1-0.78753 0.17551 0.49306-0.94736-0.36969 0.26773
 -10   4   1 3120.85 2212.28   1-0.09041-0.60965 0.90687-0.60373-0.41157 0.51363
  -6  10  -1 1885.99 1475.07   1 0.87336-0.96064 0.48558 0.27031-0.03797-0.06393
 -10   4   1 3591.98 1595.73   1-0.04627-0.65069 0.95955-0.65775-0.27769 0.37940
  -4  -6   047084.5014653.34   1-0.81378 0.20176 0.45689-0.91120-0.35917 0.35917
 -10   4   048145.3415484.97   1-0.01914-0.68093 0.91573-0.61259-0.40131 0.40131
  -6  10   041553.52 4140.39   1 0.87431-0.96159 0.48394 0.27195-0.03707 0.03707
 -10   4   049658.1610336.69   1-0.00454-0.69310 0.94612-0.64403-0.32376 0.32376
  -4  -6   1 4278.43 2390.11   1-0.84461 0.23259 0.40962-0.86392-0.34472 0.44668
 -10   4  -1 3310.87 2060.32   1 0.03212-0.73219 0.91912-0.61598-0.39264 0.29058
  -6  10   1 1616.71 1152.24   1 0.86728-0.95457 0.49588 0.26000-0.04365 0.14556
 -10   4  -1 2588.10 1464.44   1 0.03438-0.73204 0.92989-0.62779-0.36621 0.26454
  -4  -6   2 2719.27 2016.69   1-0.87779 0.26578 0.35110-0.80541-0.32587 0.52978
 -10   4  -2 1324.91 1267.94   1 0.06560-0.76567 0.91999-0.61685-0.38639 0.18227
  -6  10   2  789.61  992.94   1 0.84923-0.93651 0.52463 0.23126-0.05971 0.26354
  -4  -6   3 3569.08 2066.52   1-0.91083 0.29881 0.28129-0.73560-0.30207 0.60794
 -10   4  -3 3357.42 1890.42   1 0.08323-0.78330 0.92002-0.61688-0.38291 0.07674
 -10   4  -424790.30 8109.98   1 0.08657-0.78664 0.91999-0.61685-0.38224-0.02598
 -10   4  -5 -221.46 1316.17   1 0.07679-0.77686 0.92004-0.61690-0.38420-0.12608
   4   6  -5  231.89 1469.66   1 0.96524-0.35436-0.10842 0.56189 0.23778-0.74746
  -6  10   5  936.83  999.53   1 0.12551-0.21272 0.87851-0.12327-0.46093 0.96930
  -3  -7  -4 2557.29 1405.48   1-0.82939 0.26108 0.43368-0.96370-0.35217-0.05564
  -7  10  -4 1728.45 1253.32   1 0.77319-0.94775 0.62317 0.13272-0.11758-0.29006
 -10   3   4 3979.35 2263.35   1-0.24193-0.49859 0.96949-0.74314-0.03940 0.44624
  -3  -7  -316561.33 5538.65   1-0.82900 0.26070 0.43427-0.96429-0.35235 0.04648
 -10   3   312569.82 5021.45   1-0.39898-0.34465 0.80997-0.58267-0.42982 0.73600
  -7  10  -314455.83 3286.83   1 0.79254-0.96710 0.60087 0.15502-0.10406-0.20167
 -10   3   314927.54 6768.44   1-0.20537-0.53515 0.97485-0.74851-0.08644 0.39158
  -3  -7  -224100.36 7347.65   1-0.83668 0.26838 0.42234-0.95237-0.34868 0.14477
 -10   3   229234.0112475.51   1-0.29055-0.45309 0.85570-0.62840-0.42818 0.63230
  -7  10  -222505.65 3478.88   1 0.80484-0.97941 0.58581 0.17008-0.09508-0.10873
 -10   3   224619.65 7225.10   1-0.17013-0.57039 0.97672-0.75037-0.13063 0.33405
  -3  -7  -118430.89 6268.28   1-0.85115 0.28285 0.39879-0.92881-0.34131 0.23936
 -10   3   121431.30 7744.57   1-0.20178-0.54203 0.88321-0.65585-0.42334 0.52540
  -7  10  -118686.09 3742.20   1 0.80972-0.98428 0.57964 0.17625-0.09143-0.01047
 -10   3   118924.53 6518.77   1-0.13711-0.60341 0.97567-0.74932-0.17106 0.27277
  -3  -7   0 4009.26 2049.51   1-0.87088 0.30258 0.36409-0.89411-0.33014 0.33014
 -10   3   0 5345.79 2847.66   1-0.13171-0.61210 0.89951-0.67216-0.41655 0.41655
  -7  10   0 3032.98 2023.58   1 0.80608-0.98064 0.58426 0.17163-0.09416 0.09416
 -10   3   0 3816.97 2045.39   1-0.10759-0.63293 0.97252-0.74617-0.20644 0.20644
  -3  -7   118025.48 5919.78   1-0.89405 0.32575 0.31855-0.84857-0.31494 0.41689
 -10   3  -125005.67 9304.62   1-0.07968-0.66413 0.90852-0.68116-0.41016 0.30810
  -7  10   120314.28 3210.33   1 0.79166-0.96623 0.60191 0.15397-0.10468 0.20660
  -3  -7   227256.50 4233.08   1-0.91862 0.35032 0.26240-0.79243-0.29541 0.49932
 -10   3  -232949.8111686.08   1-0.04436-0.69946 0.91315-0.68580-0.40518 0.20107
  -7  10   226618.90 3356.91   1 0.76207-0.93664 0.63529 0.12059-0.12505 0.32887
 -10   3  -317891.78 8093.27   1-0.02438-0.71943 0.91525-0.68789-0.40214 0.09597
 -10   3  -4 4155.97 2331.13   1-0.01856-0.72526 0.91579-0.68843-0.40122-0.00700
   3   7  -4 2992.93 2361.68   1 0.96278-0.39553-0.11983 0.64887 0.24226-0.65000
  -2  -8  -4  654.02  835.19   1-0.89387 0.36928 0.31893-0.92467-0.31507-0.09274
  -8  10  -4 1403.19 2102.48   1 0.70494-0.96679 0.69086 0.06503-0.16050-0.24714
 -10   2   4 1001.89 1141.83   1-0.30546-0.47863 0.95111-0.80021 0.04550 0.36133
  -2  -8  -3 4212.46 2422.12   1-0.89115 0.36657 0.32458-0.93032-0.31699 0.01112
 -10   2   3 6426.27 3261.38   1-0.48698-0.30041 0.76218-0.61065-0.42652 0.73270
  -8  10  -3 6594.75 2888.23   1 0.72261-0.98446 0.67477 0.08112-0.15001-0.15572
 -10   2   3 7658.43 4356.89   1-0.27790-0.50618 0.96057-0.80967 0.00815 0.29697
  -2  -8  -222486.10 8492.40   1-0.89500 0.37042 0.31654-0.92228-0.31426 0.11035
 -10   2   227196.69 8823.55   1-0.38942-0.39797 0.81456-0.66303-0.42991 0.63403
  -8  10  -228421.18 4403.75   1 0.73227-0.99412 0.66559 0.09030-0.14411-0.05971
 -10   2   227345.92 9333.20   1-0.25322-0.53086 0.96709-0.81619-0.02461 0.22803
  -2  -8  -114132.11 5024.89   1-0.90431 0.37972 0.29627-0.90202-0.30729 0.20534
 -10   2   115336.77 4082.74   1-0.30695-0.48043 0.84964-0.69811-0.42880 0.53086
  -8  10  -114727.75 3695.26   1 0.73311-0.99496 0.66477 0.09112-0.14358 0.04167
 -10   2   110673.83 4697.61   1-0.23289-0.55119 0.97115-0.82025-0.05114 0.15285
  -2  -8   0  116.83  749.96   1-0.91769 0.39310 0.26472-0.87046-0.29623 0.29623
 -10   2   0  279.71 1034.27   1-0.24054-0.54703 0.87207-0.72050-0.42617 0.42617
  -8  10   0  851.56 1912.99   1 0.72351-0.98536 0.67393 0.08196-0.14947 0.14947
 -10   2   0  709.65  764.39   1-0.21926-0.56482 0.97324-0.82234-0.06871 0.06871
  -2  -8   113325.31 3247.93   1-0.93353 0.40894 0.22255-0.82829-0.28105 0.38300
 -10   2  -115365.93 5102.46   1-0.18967-0.59790 0.88637-0.73480-0.42232 0.32026
  -8  10   115906.26 2837.29   1 0.70045-0.96230 0.69480 0.06109-0.16310 0.26501
 -10   2  -226929.2910690.44   1-0.15403-0.63354 0.89485-0.74328-0.41894 0.21483
  -8  10   225585.51 3006.24   1 0.65814-0.92026 0.72940 0.02727-0.18660 0.39034
   2   8  -229209.26 4731.04   1 0.94984-0.42623-0.17086 0.77548 0.26190-0.46577
 -10   2  -3 5611.90 2531.98   1-0.13283-0.65474 0.89929-0.74772-0.41668 0.11050
   2   8  -3 5974.72 2728.03   1 0.96511-0.44150-0.10904 0.71366 0.23803-0.54383
 -10   2  -4  620.74 1076.64   1-0.12528-0.66229 0.90077-0.74920-0.41582 0.00759
   2   8  -4  841.81 1630.02   1 0.97703-0.45342-0.03826 0.64288 0.20959-0.61733
  -8  10   4  979.69  984.26   1 0.15975-0.42137 0.85421-0.09897-0.49477 0.90146
  -1  -9  -3  957.37 1070.73   1-0.93879 0.45792 0.20700-0.88846-0.27533-0.03052
 -10   1   3 2029.83 2052.24   1-0.56521-0.26592 0.71030-0.63453-0.41952 0.72570
  -9  10  -3 1173.41 1989.35   1 0.64411-0.99360 0.73993 0.01673-0.19395-0.11166
  -1  -9  -221121.11 3697.30   1-0.93968 0.45881 0.20427-0.88573-0.27433 0.07042
 -10   1   221334.86 7498.41   1-0.47904-0.35209 0.76693-0.69116-0.42700 0.63112
  -9  10  -221621.23 4167.52   1 0.65019-0.99969 0.73541 0.02125-0.19078-0.01295
 -10   1   1 1365.58 1813.66   1-0.40446-0.42667 0.80729-0.73153-0.42974 0.53180
  -9  10  -1 2168.35 2179.14   1 0.64619-0.99568 0.73840 0.01827-0.19287 0.09100
 -10   1   0 1321.37 1630.58   1-0.34287-0.48826 0.83533-0.75957-0.42970 0.42970
  -9  10   0  179.87 1327.20   1 0.63005-0.97954 0.75005 0.00661-0.20112 0.20112
   1   9   0  838.56 1313.45   1 0.95219-0.47221-0.16246 0.84266 0.25871-0.25871
 -10   1  -1 2735.79 2218.35   1-0.29482-0.53631 0.85416-0.77839-0.42835 0.32629
  -9  10   1 1711.67 1838.26   1 0.59829-0.94778 0.77141-0.01474-0.21668 0.31855
   1   9  -1 2959.59 2323.87   1 0.96163-0.48165-0.12489 0.80508 0.24423-0.34617
 -10   1  -216715.01 7672.20   1-0.26032-0.57101 0.86578-0.79000-0.42736 0.22324
   1   9  -219190.07 3985.39   1 0.97112-0.49114-0.07766 0.75786 0.22557-0.42944
 -10   1  -3 1240.62 1861.37   1-0.23903-0.59229 0.87253-0.79674-0.42608 0.11990
   1   9  -3  243.24 1592.99   1 0.97900-0.49902-0.02151 0.70170 0.20270-0.50850
 -10   0   222771.21 9287.43   1-0.55929-0.31559 0.71457-0.71457-0.42020 0.62432
 -10  10  -219952.27 3769.21   1 0.56201-0.99888 0.79349-0.03682-0.23344 0.02970
   0  10   224882.96 4159.95   1 0.96885-0.53251-0.09022 0.84599 0.23058-0.02671
 -10   0   1 8523.58 4316.75   1-0.49310-0.38177 0.75846-0.75846-0.42612 0.52818
 -10  10  -1 9627.10 3298.46   1 0.55301-0.98987 0.79861-0.04194-0.23745 0.13558
   0  10   1 6430.93 2001.11   1 0.97067-0.53432-0.08026 0.83603 0.22660-0.12467
 -10   0   0 2046.60 1691.34   1-0.43744-0.43744 0.79035-0.79035-0.42892 0.42892
 -10  10   0  380.54 1208.69   1 0.53059-0.96745 0.81078-0.05411-0.24717 0.24717
   0  10   0  799.23 1973.79   1 0.97421-0.53786-0.05861 0.81438 0.21789-0.21789
 -10   0  -110737.13 4128.98   1-0.39324-0.48163 0.81274-0.81274-0.42988 0.32782
 -10  10   1 8777.31 2529.83   1 0.49109-0.92796 0.83030-0.07363-0.26345 0.36533
   0  10  -1 9361.93 3005.23   1 0.97844-0.54210-0.02656 0.78233 0.20478-0.30672
 -10   0  -219439.59 9274.42   1-0.36094-0.51393 0.82757-0.82757-0.42992 0.22579
   0  10  -218466.20 4328.87   1 0.98215-0.54580 0.01487 0.74089 0.18749-0.39136
 -10  -1   0 4809.28 3165.10   1-0.52340-0.39521 0.73922-0.81499-0.42378 0.42378
 -11  10   0 4890.58 2415.55   1 0.42835-0.95259 0.85671-0.10003-0.28733 0.28733
  -1  11   0 2555.47 1677.31   1 0.98356-0.59085 0.04381 0.78753 0.17518-0.17518
  -9  -2  -2 8162.46 3856.75   1-0.50522-0.36965 0.75093-0.90246-0.42525 0.22113
  -2  11  -2 9533.29 3110.97   1 0.97857-0.67312 0.16684 0.66450 0.12067-0.32454
 -11   9   2 8177.25 3698.13   1 0.14162-0.70846 0.86743-0.18772-0.47697 0.68031
  -9  -2  -1 1140.77 1776.55   1-0.53400-0.34087 0.73216-0.88369-0.42281 0.32075
 -11   9   1  728.40 1658.92   1 0.31061-0.87854 0.89278-0.21177-0.32627 0.42815
  -2  11  -1 1308.30 1537.05   1 0.98166-0.67622 0.13399 0.69735 0.13558-0.23751
  -9  -2   0 5368.81 2207.82   1-0.57264-0.30223 0.70485-0.85638-0.41863 0.41863
 -11   9   0 4782.49 2345.67   1 0.36187-0.92980 0.87910-0.19809-0.31020 0.31020
  -2  11   0 3518.53 2059.17   1 0.98307-0.67763 0.11059 0.72075 0.14603-0.14603
  -9  -2   1  862.02 1631.17   1-0.62019-0.25468 0.66760-0.81913-0.41189 0.51395
 -11   9  -1 1576.45 2431.22   1 0.39420-0.96212 0.86889-0.18789-0.29937 0.19750
  -2  11   1  603.51 1309.92   1 0.98356-0.67812 0.09808 0.73326 0.15157-0.04964
  -9  -2   2 7606.84 4903.37   1-0.67523-0.19964 0.61869-0.77022-0.40159 0.60571
 -11   9  -2 6976.86 2572.74   1 0.41127-0.97920 0.86298-0.18198-0.29343 0.08968
  -2  11   2 6383.05 2122.09   1 0.98356-0.67812 0.09826 0.73308 0.15149 0.05237
  -8  -3  -3 1244.44 1730.69   1-0.54574-0.28538 0.72412-0.95142-0.42165 0.11547
  -3  11  -3 1378.01 1737.42   1 0.95901-0.74083 0.27459 0.55674 0.06994-0.37575
 -11   8   3  817.58 1036.94   1 0.04564-0.65609 0.92456-0.32037-0.37827 0.68329
  -8  -3  -2 9854.58 5619.38   1-0.56326-0.26786 0.71171-0.93901-0.41974 0.21562
 -11   8   211236.42 7400.88   1 0.14483-0.75739 0.91777-0.31149-0.36975 0.57386
  -3  11  -211648.28 2585.97   1 0.96752-0.74935 0.23696 0.59437 0.08799-0.29186
 -11   8   217318.05 6577.97   1 0.10134-0.71179 0.89399-0.28981-0.43645 0.63980
  -8  -3  -1 1770.57 1623.19   1-0.59080-0.24032 0.69112-0.91842-0.41627 0.31421
 -11   8   1 2742.86 1544.78   1 0.22660-0.83916 0.90901-0.30273-0.34976 0.45182
  -3  11  -1 1227.27 1485.95   1 0.97288-0.75470 0.20771 0.62363 0.10177-0.20371
 -11   8   1 1861.76 1875.47   1 0.15480-0.76525 0.85789-0.25371-0.48994 0.59161
  -8  -3   0 2868.84 2100.82   1-0.62754-0.20359 0.66145-0.88875-0.41068 0.41068
 -11   8   0 3801.37 2158.75   1 0.28411-0.89572 0.89870-0.29336-0.33409 0.33409
  -3  11   0 2186.09 1773.17   1 0.97585-0.75768 0.18820 0.64314 0.11085-0.11085
  -8  -3   1 2284.02 1498.45   1-0.67227-0.15886 0.62149-0.84879-0.40222 0.50428
 -11   8  -1 2381.43 2136.11   1 0.32106-0.93267 0.89023-0.28489-0.32310 0.22123
  -3  11   1 3000.09 2110.30   1 0.97694-0.75877 0.18011 0.65122 0.11458-0.01264
  -8  -3   215300.32 7472.41   1-0.72307-0.10751 0.56991-0.79706-0.39033 0.59424
 -11   8  -215183.13 2945.79   1 0.34188-0.95349 0.88479-0.27945-0.31662 0.11288
  -3  11   211114.69 2315.33   1 0.97621-0.75803 0.18563 0.64571 0.11203 0.09183
  -8  -3   3 2249.47 1333.18   1-0.77821-0.05237 0.50514-0.73229-0.37310 0.67896
 -11   8  -3 2254.65 1977.68   1 0.34908-0.96069 0.88279-0.27746-0.31433 0.00871
  -7  -4  -3  791.96 1255.52   1-0.61074-0.17664 0.67535-0.97841-0.41338 0.10720
  -4  11  -3 1643.17 1942.95   1 0.93705-0.80613 0.34744 0.48403 0.03464-0.34037
 -11   7   3 1170.06  936.08   1-0.00097-0.65307 0.94477-0.41611-0.32770 0.63272
  -7  -4  -2 7605.43 4179.60   1-0.62681-0.16057 0.66207-0.96513-0.41081 0.20668
 -11   7   2 9706.36 3067.08   1 0.04784-0.70416 0.91966-0.38917-0.38976 0.59388
  -4  11  -2 8308.21 2486.53   1 0.94803-0.81713 0.31410 0.51724 0.05059-0.25446
 -11   7   2 9151.74 5958.36   1 0.05245-0.70650 0.92120-0.39254-0.38551 0.58886
  -7  -4  -1 2155.72 1407.47   1-0.65228-0.13511 0.63991-0.94298-0.40624 0.30418
 -11   7   1  858.41 1588.81   1 0.13399-0.79031 0.91843-0.38794-0.37218 0.47424
  -4  11  -1  946.77 2032.09   1 0.95511-0.82421 0.28952 0.54182 0.06268-0.16461
 -11   7   1 1383.95 1319.51   1 0.10426-0.75831 0.89220-0.36353-0.43943 0.54110
  -7  -4   0 6068.91 3401.36   1-0.68611-0.10128 0.60818-0.91125-0.39919 0.39919
 -11   7   0 4413.53 2150.38   1 0.19552-0.85184 0.91313-0.38264-0.35770 0.35770
  -4  11   0 4227.40 2184.18   1 0.95891-0.82800 0.27499 0.55635 0.06975-0.06975
 -11   7   0 5154.04 2153.80   1 0.15351-0.80756 0.85885-0.33018-0.48868 0.48868
  -7  -4   1  851.84 1063.64   1-0.72664-0.06023 0.56602-0.86889-0.38935 0.49130
 -11   7  -1 1582.04 1874.44   1 0.23694-0.89325 0.90742-0.37693-0.34703 0.24497
  -4  11   1  661.79 1247.73   1 0.95955-0.82864 0.27243 0.55891 0.07099 0.03094
  -7  -4   211712.57 3964.92   1-0.77254-0.01433 0.51232-0.81519-0.37509 0.57900
 -11   7  -2 6606.29 2395.53   1 0.26230-0.91759 0.90300-0.37333-0.34027 0.13652
  -4  11   2 7367.43 2456.89   1 0.95649-0.82558 0.28438 0.54696 0.06519 0.13867
  -7  -4   3  780.92 1098.36   1-0.82120 0.03432 0.44603-0.74890-0.35592 0.66178
 -11   7  -3 1976.55 1688.08   1 0.27265-0.92794 0.90102-0.37135-0.33736 0.03174
  -6  -5  -3 -131.64 1177.40   1-0.67948-0.06416 0.61462-0.99345-0.40067 0.09449
  -5  11  -3   97.17 1476.81   1 0.90573-0.86209 0.42381 0.40766-0.00473-0.30100
 -11   6   3  200.02 1267.85   1-0.05483-0.64213 0.96187-0.50918-0.26792 0.57305
  -6  -5  -2 2309.05 1613.62   1-0.69338-0.05026 0.60099-0.97983-0.39752 0.19339
 -11   6   2 2828.59 1571.07   1-0.05359-0.64647 0.91205-0.45735-0.40654 0.61065
  -5  11  -2 1081.57 2055.47   1 0.91816-0.87452 0.39607 0.43541 0.00977-0.21360
 -11   6   2 1200.48 1095.53   1-0.00513-0.69251 0.94634-0.49320-0.32311 0.52646
  -6  -5  -1 1226.36  993.65   1-0.71559-0.02757 0.57792-0.95651-0.39233 0.29038
 -11   6   1  237.32 1065.85   1 0.03474-0.73481 0.91923-0.46452-0.39217 0.49423
  -5  11  -1  928.26 1932.25   1 0.92602-0.88238 0.37693 0.45454 0.01964-0.12155
 -11   6   1  451.62  821.26   1 0.04316-0.74081 0.92576-0.47262-0.37562 0.47730
  -6  -5   022371.24 8026.89   1-0.74554 0.00238 0.54479-0.92338-0.38386 0.38386
 -11   6   022198.28 9630.98   1 0.09970-0.79977 0.91978-0.46507-0.37955 0.37955
  -5  11   021978.49 8256.85   1 0.92947-0.88582 0.36810 0.46338 0.02416-0.02416
 -11   6   021424.79 7377.16   1 0.08934-0.78700 0.90118-0.44804-0.42413 0.42413
  -6  -5   1  172.77 1432.65   1-0.78133 0.03817 0.50114-0.87973-0.37197 0.47393
 -11   6  -1 1012.68  914.18   1 0.14486-0.84493 0.91777-0.46306-0.36974 0.26768
  -5  11   1 1436.14 1921.39   1 0.92809-0.88444 0.37168 0.45980 0.02233 0.07957
 -11   6  -1  395.82  500.32   1 0.13237-0.83002 0.87387-0.42073-0.46778 0.36611
  -6  -5   2 4052.66 2812.30   1-0.82102 0.07785 0.44629-0.82488-0.35599 0.55990
 -11   6  -2 1141.18 2107.01   1 0.17306-0.87313 0.91550-0.46079-0.36317 0.15906
  -5  11   2  840.45 1095.24   1 0.92053-0.87689 0.39044 0.44104 0.01269 0.19112
 -11   6  -2 1680.38 1062.17   1 0.17100-0.86865 0.84560-0.39246-0.50567 0.30232
  -6  -5   3  655.47 1138.28   1-0.86229 0.11912 0.37960-0.75819-0.33518 0.64105
 -11   6  -3  561.40 1255.63   1 0.18651-0.88658 0.91414-0.45943-0.35992 0.05375
  -5  -6  -3 1132.61 1118.29   1-0.74838 0.04893 0.54151-0.99581-0.38300 0.07713
  -6  11  -3  376.84 1467.09   1 0.86401-0.90766 0.50129 0.33019-0.04665-0.25908
 -11   5   3  844.91  925.68   1-0.11482-0.62570 0.97348-0.59623-0.19785 0.50298
 -11   5   2 1991.52 1160.86   1-0.15578-0.58803 0.89446-0.51553-0.41912 0.62324
  -6  11  -2 2299.50 2016.22   1 0.87690-0.92054 0.47941 0.35207-0.03459-0.16922
 -11   5   2  576.71 1256.21   1-0.07084-0.66969 0.96577-0.58853-0.24950 0.45292
  -5  -6  -1  545.95 1104.06   1-0.77832 0.07887 0.50500-0.95931-0.37306 0.27110
 -11   5   1 1001.61 2417.97   1-0.06779-0.67602 0.91021-0.53128-0.40855 0.51060
  -6  11  -1  491.30 1262.98   1 0.88426-0.92790 0.46618 0.36529-0.02739-0.07451
 -11   5   1  144.51 1072.13   1-0.02836-0.71289 0.95438-0.57677-0.29721 0.39889
  -5  -6   023980.45 8343.75   1-0.80349 0.10404 0.47147-0.92577-0.36346 0.36346
 -11   5   027791.8510178.39   1-0.00117-0.74264 0.91720-0.53828-0.39840 0.39840
  -6  11   025201.35 4114.97   1 0.88578-0.92942 0.46338 0.36810-0.02587 0.02587
 -11   5   019592.43 7605.26   1 0.01188-0.75314 0.93968-0.56206-0.34183 0.34183
  -5  -6   1  549.52 1747.51   1-0.83340 0.13395 0.42748-0.88178-0.35027 0.45222
 -11   5  -1 1397.76 1348.26   1 0.04656-0.79039 0.91963-0.54070-0.39000 0.28794
  -6  11   1  790.67 1553.82   1 0.88042-0.92406 0.47316 0.35832-0.03118 0.13309
 -11   5  -1  374.45 1051.63   1 0.04877-0.79003 0.92303-0.54541-0.38161 0.27993
  -5  -6   2 3743.94 2448.28   1-0.86614 0.16669 0.37272-0.82703-0.33296 0.53686
 -11   5  -2 2311.18 2060.44   1 0.07764-0.82147 0.92004-0.54112-0.38403 0.17991
  -6  11   2 1033.26 1324.97   1 0.86580-0.90944 0.49834 0.33313-0.04501 0.24884
  -5  -6   3 1200.04  972.50   1-0.89949 0.20004 0.30693-0.76124-0.31097 0.61683
 -11   5  -3  572.99  967.04   1 0.09390-0.83772 0.91989-0.54097-0.38075 0.07457
  -4  -7  -3  831.60 1168.19   1-0.81449 0.15875 0.45587-0.98589-0.35886 0.05300
  -7  11  -3  511.60 1516.17   1 0.81176-0.94268 0.57702 0.25446-0.08989-0.21583
 -11   4   3  518.90 1069.98   1-0.17979-0.60429 0.97652-0.67472-0.11862 0.42376
  -4  -7  -2 9249.58 4489.53   1-0.82237 0.16664 0.44428-0.97431-0.35539 0.15148
 -11   4   2 8628.42 4002.60   1-0.25540-0.53216 0.86738-0.56424-0.42708 0.63120
  -7  11  -210193.71 3116.81   1 0.82387-0.95480 0.56101 0.27047-0.08054-0.12327
 -11   4   210353.95 3931.47   1-0.14326-0.64082 0.97606-0.67427-0.16360 0.36702
  -4  -7  -1 1774.31 1233.87   1-0.83690 0.18116 0.42200-0.95202-0.34858 0.24662
 -11   4   1 1435.58 1280.97   1-0.17023-0.61734 0.89115-0.58801-0.42054 0.52260
  -7  11  -1 1098.35 1809.85   1 0.82932-0.96025 0.55354 0.27794-0.07621-0.02569
 -11   4   1  923.54 1415.68   1-0.10890-0.67518 0.97270-0.67091-0.20489 0.30660
  -4  -7   0 4188.35 2272.10   1-0.85673 0.20100 0.38929-0.91932-0.33829 0.33829
 -11   4   0 6365.73 2567.86   1-0.10392-0.68365 0.90465-0.60151-0.41328 0.41328
  -7  11   0 3286.78 1957.27   1 0.82731-0.95824 0.55632 0.27516-0.07782 0.07782
 -11   4   0 3208.29 1892.56   1-0.07781-0.70627 0.96729-0.66549-0.24142 0.24142
  -4  -7   1 2870.79 1541.80   1-0.88030 0.22457 0.34627-0.87629-0.32426 0.42622
 -11   4  -1 1611.35 1729.21   1-0.05505-0.73252 0.91187-0.60873-0.40674 0.30469
  -7  11   1  658.15 1545.55   1 0.81608-0.94700 0.57141 0.26007-0.08660 0.18851
  -4  -7   210829.19 6102.31   1-0.90578 0.25004 0.29296-0.82299-0.30615 0.51006
 -11   4  -210175.94 4276.98   1-0.02208-0.76549 0.91546-0.61232-0.40178 0.19766
  -7  11   211092.27 2613.17   1 0.79214-0.92307 0.60134 0.23014-0.10434 0.30816
  -4  -7   3  622.92 1450.59   1-0.93110 0.27537 0.22941-0.75944-0.28355 0.58941
 -11   4  -3 -345.86 1458.00   1-0.00363-0.78393 0.91702-0.61388-0.39880 0.09263
  -3  -8  -3 1868.49 1841.06   1-0.87352 0.26150 0.35919-0.96493-0.32854 0.02267
 -11   3   3 2613.65 1916.22   1-0.44607-0.38506 0.78569-0.55839-0.42861 0.73479
  -8  11  -3 2165.13 2239.51   1 0.74961-0.96782 0.64833 0.18315-0.13318-0.17255
 -11   3   3 2391.28 2185.15   1-0.24787-0.57977 0.96827-0.74192-0.03162 0.33676
  -3  -8  -210527.69 5634.29   1-0.87812 0.26610 0.35048-0.95622-0.32566 0.12175
 -11   3   210539.49 4023.80   1-0.34960-0.48153 0.83249-0.60519-0.42980 0.63392
  -8  11  -213012.95 3266.26   1 0.75979-0.97800 0.63772 0.19375-0.12655-0.07726
 -11   3   212612.86 6307.17   1-0.22023-0.60741 0.97311-0.74676-0.06747 0.27089
  -3  -8  -1 2178.88 1559.86   1-0.88825 0.27623 0.33052-0.93626-0.31899 0.21704
 -11   3   1 1361.92 1659.14   1-0.26961-0.56171 0.86269-0.63533-0.42786 0.52992
  -8  11  -1 1927.94 1643.67   1 0.76208-0.98029 0.63529 0.19619-0.12504 0.02313
 -11   3   1 1309.84  826.28   1-0.19624-0.63140 0.97564-0.74929-0.09799 0.19970
  -3  -8   0 2626.79 1494.21   1-0.90266 0.29064 0.29996-0.90570-0.30857 0.30857
 -11   3   0 2823.72 2201.89   1-0.20548-0.62584 0.88221-0.65485-0.42364 0.42364
  -8  11   0 1973.48 1562.46   1 0.75519-0.97340 0.64256 0.18892-0.12956 0.12956
  -3  -8   1 2777.97 2063.82   1-0.91988 0.30786 0.25924-0.86499-0.29429 0.39624
 -11   3  -1 2282.81 1611.66   1-0.15700-0.67432 0.89419-0.66683-0.41924 0.31719
  -8  11   1 1442.22 1647.33   1 0.73669-0.95490 0.66128 0.17020-0.14136 0.24327
  -3  -8   211672.56 3447.58   1-0.93823 0.32622 0.20869-0.81443-0.27596 0.47987
 -11   3  -214503.54 5500.29   1-0.12332-0.70800 0.90114-0.67379-0.41560 0.21148
 -11   3  -3 1759.46 1510.67   1-0.10352-0.72781 0.90472-0.67736-0.41323 0.10706
   3   8  -3 2270.22 2470.33   1 0.95574-0.34485-0.14912 0.75373 0.25361-0.55941
  -2  -9  -2 8279.63 2972.43   1-0.92379 0.35549 0.24918-0.93063-0.29069 0.08678
 -11   2   2 5770.91 4714.52   1-0.43756-0.43731 0.79029-0.63875-0.42892 0.63304
  -9  11  -2 5123.65 2497.41   1 0.68581-0.99162 0.70727 0.12506-0.17152-0.03222
 -11   2   2 4850.95 3327.58   1-0.29876-0.57245 0.95363-0.80273 0.03635 0.16707
  -2  -9  -1  311.97 1210.89   1-0.92990 0.36160 0.23277-0.91423-0.28477 0.18281
 -11   2   1  484.06  903.72   1-0.36352-0.51135 0.82643-0.67490-0.42993 0.53199
  -9  11  -1 1134.87 2299.33   1 0.68401-0.98981 0.70877 0.12356-0.17253 0.07065
  -2  -9   0 4954.57 2396.71   1-0.93925 0.37095 0.20559-0.88705-0.27481 0.27481
 -11   2   0 3783.33 1907.90   1-0.30315-0.57172 0.85108-0.69954-0.42867 0.42867
  -9  11   0 4566.51 2151.17   1 0.67141-0.97721 0.71902 0.11331-0.17947 0.17947
 -11   2  -1  692.61  995.96   1-0.25663-0.61845 0.86699-0.71542-0.42715 0.32510
  -9  11   1  299.53 1459.61   1 0.64503-0.95084 0.73925 0.09308-0.19347 0.29534
   2   9  -1  937.70 1660.83   1 0.95034-0.38309-0.16912 0.84931 0.26124-0.36318
 -11   2  -2 9231.72 4115.39   1-0.22340-0.65168 0.87718-0.72561-0.42500 0.22089
   2   9  -2 6424.18 3220.52   1 0.96221-0.39496-0.12235 0.80254 0.24324-0.44711
 -11   1   0 4596.49 3030.12   1-0.39549-0.52313 0.81166-0.73590-0.42986 0.42986
 -10  11   0 3915.79 2252.98   1 0.57984-0.97302 0.78294 0.04939-0.22533 0.22533
   1  10   0 2813.86 1797.71   1 0.96505-0.44144-0.10933 0.86511 0.23814-0.23814
  -7  -5  -1 4653.90 2743.64   1-0.72075-0.10984 0.57241-0.95100-0.39096 0.28900
 -12   7   1 2794.80 1801.70   1 0.03364-0.77746 0.91919-0.38869-0.39237 0.49442
  -5  12  -1 1153.69 1406.01   1 0.92617-0.83889 0.37657 0.53050 0.01983-0.12174
 -12   7   1 3022.62 2381.65   1 0.04279-0.78404 0.92594-0.39728-0.37522 0.47690
  -7  -5   0 1478.09 1730.02   1-0.74839-0.08220 0.54149-0.92008-0.38299 0.38299
 -12   7   0 2191.09 1683.78   1 0.09496-0.83879 0.91987-0.38938-0.38053 0.38053
  -5  12   0 1904.64 1562.88   1 0.92939-0.84210 0.36830 0.53877 0.02406-0.02406
 -12   7   0  521.94 1114.53   1 0.08526-0.82651 0.90355-0.37488-0.41990 0.41990
  -7  -5   1 4521.24 2665.96   1-0.78169-0.04890 0.50068-0.87927-0.37184 0.47380
 -12   7  -1 4004.73 3544.69   1 0.13773-0.88156 0.91822-0.38772-0.37134 0.26929
  -5  12   1 3025.01 1826.11   1 0.92810-0.84082 0.37164 0.53543 0.02235 0.07955
 -12   7  -1 2833.78 1714.25   1 0.12412-0.86538 0.87944-0.35078-0.45953 0.35786
  -6  -6  -1 2835.64 1581.15   1-0.77601-0.01086 0.50795-0.96225-0.37388 0.27192
 -12   6   1 1094.91 1173.16   1-0.05818-0.72939 0.91148-0.45677-0.40719 0.50925
  -6  12  -1  720.31 1302.04   1 0.88931-0.88931 0.45675 0.45031-0.02229-0.07961
 -12   6   1  595.05  917.00   1-0.02008-0.76477 0.95166-0.49852-0.30649 0.40816
  -6  -6   0 1498.01 1638.65   1-0.79976 0.01288 0.47662-0.93093-0.36496 0.36496
 -12   6   0 1493.71 1161.45   1 0.00473-0.79231 0.91762-0.46291-0.39741 0.39741
  -6  12   0  291.99 1238.17   1 0.89099-0.89099 0.45353 0.45353-0.02056 0.02056
 -12   6   0 1621.65 1424.73   1 0.01785-0.80271 0.93720-0.48406-0.34833 0.34833
  -6  -6   1  826.48 1393.40   1-0.82826 0.04138 0.43540-0.88970-0.35269 0.45465
 -12   6  -1  699.53 1174.31   1 0.04979-0.83737 0.91971-0.46501-0.38940 0.28734
  -6  12   1 1359.04 1645.49   1 0.88647-0.88647 0.46209 0.44498-0.02517 0.12708
  -5  -7  -1 4181.92 2637.51   1-0.82898 0.08582 0.43430-0.96432-0.35236 0.25040
 -12   5   1 3898.93 2504.92   1-0.15156-0.67976 0.89538-0.51646-0.41869 0.52075
  -7  12  -1 3303.28 1971.51   1 0.84100-0.92829 0.53689 0.37017-0.06667-0.03523
 -12   5   1 4442.70 2012.88   1-0.09162-0.73603 0.96997-0.59272-0.22529 0.32700
  -5  -7   0 2420.15 1466.91   1-0.84834 0.10518 0.40347-0.93350-0.34279 0.34279
 -12   5   0 1458.56 2132.41   1-0.08853-0.74280 0.90717-0.52825-0.41133 0.41133
  -7  12   0  146.43 1212.25   1 0.83987-0.92715 0.53855 0.36852-0.06761 0.06761
  -5  -7   1 3710.69 2751.08   1-0.87157 0.12841 0.36281-0.89283-0.32972 0.43168
 -12   5  -1 3759.25 2422.94   1-0.04225-0.78907 0.91339-0.53447-0.40487 0.30281
  -7  12   1 3360.94 1681.27   1 0.83055-0.91783 0.55183 0.35524-0.07523 0.17714
;
_shelx_hkl_checksum   57297
